# Supplementary material for: Identification of a novel intermittent hypoxia-related prognostic lncRNA signature and the ceRNA of lncRNA GSEC/miR-873-3p/EGLN3 regulatory axis in lung adenocarcinoma
Source: PeerJ journal article supplement (doi:10.7717/peerj.16242), 2023-10-10
Supplement: codefiles.zip [file codefiles.zip]

## Sheet: TargetScanHuman_8.0
Target gene	Representative transcript	Gene name	3P-seq tags + 5	Total sites	8mer sites	7mer-m8 sites	7mer-A1 sites	6mer sites	Representative miRNA	Predicted occupancy (low miRNA)	Predicted occupancy (high miRNA)	Predicted occupancy (transfected miRNA)	Cumulative weighted context++ score	Total context++ score	Aggregate PCT
AL590235.1	ENST00000593823.1	Uncharacterized protein	97	13	0	13	0	0	hsa-miR-873-3p	0.3603	2.1779	7.198	-2.18	-2.37	N/A
FAM25G	ENST00000457620.1	family with sequence similarity 25, member G	5	1	1	0	0	0	hsa-miR-873-3p	0.0096	0.067	0.3468	-0.76	-0.76	N/A
FAM25B	ENST00000452267.1	family with sequence similarity 25, member B	5	1	1	0	0	0	hsa-miR-873-3p	0.0096	0.067	0.3468	-0.76	-0.76	N/A
FAM25A	ENST00000343959.4	family with sequence similarity 25, member A	5	1	1	0	0	0	hsa-miR-873-3p	0.0097	0.0674	0.348	-0.76	-0.76	N/A
CD40LG	ENST00000370629.2	CD40 ligand	5	4	0	4	0	0	hsa-miR-873-3p	0.0418	0.2886	1.4449	-0.71	-0.71	N/A
FUOM	ENST00000278025.4	fucose mutarotase	1270	1	1	0	0	0	hsa-miR-873-3p	0.0138	0.0937	0.4371	-0.67	-0.68	N/A
NUDT4	ENST00000337179.5	nudix (nucleoside diphosphate linked moiety X)-type motif 4	41	2	2	0	0	0	hsa-miR-873-3p	0.0235	0.1642	0.9012	-0.62	-0.62	N/A
GART	ENST00000361093.5	phosphoribosylglycinamide formyltransferase, phosphoribosylglycinamide synthetase, phosphoribosylaminoimidazole synthetase	2813	1	1	0	0	0	hsa-miR-873-3p	0.0179	0.123	0.6243	-0.59	-0.59	N/A
CA13	ENST00000321764.3	carbonic anhydrase XIII	42	3	1	1	1	1	hsa-miR-873-3p	0.0339	0.2336	1.2005	-0.58	-0.58	N/A
CD5L	ENST00000368174.4	CD5 molecule-like	5	1	1	0	0	0	hsa-miR-873-3p	0.0133	0.0904	0.4236	-0.57	-0.57	N/A
S100A16	ENST00000368704.1	S100 calcium binding protein A16	88	1	1	0	0	0	hsa-miR-873-3p	0.0151	0.1029	0.4856	-0.52	-0.52	N/A
NFX1	ENST00000379540.3	nuclear transcription factor, X-box binding 1	215	2	1	0	1	0	hsa-miR-873-3p	0.0181	0.1244	0.6182	-0.5	-0.53	N/A
PP13439	ENST00000331659.2		289	2	1	1	0	1	hsa-miR-873-3p	0.041	0.2697	1.1377	-0.5	-0.51	N/A
RELL2	ENST00000297164.3	RELT-like 2	44	2	1	1	0	0	hsa-miR-873-3p	0.027	0.1837	0.8536	-0.5	-0.5	N/A
CDK2AP1	ENST00000261692.2	cyclin-dependent kinase 2 associated protein 1	1047	1	1	0	0	0	hsa-miR-873-3p	0.0123	0.0842	0.4045	-0.49	-0.49	N/A
AL590452.1	ENST00000596396.1	Uncharacterized protein	5	1	1	0	0	2	hsa-miR-873-3p	0.0182	0.1304	0.7849	-0.49	-0.49	N/A
RELL1	ENST00000314117.4	RELT-like 1	10	1	1	0	0	0	hsa-miR-873-3p	0.0318	0.1951	0.6413	-0.49	-0.49	N/A
M6PR	ENST00000000412.3	mannose-6-phosphate receptor (cation dependent)	46	1	1	0	0	0	hsa-miR-873-3p	0.0125	0.0857	0.4092	-0.48	-0.48	N/A
TMEM97	ENST00000226230.6	transmembrane protein 97	10226	2	1	1	0	0	hsa-miR-873-3p	0.0277	0.1881	0.8676	-0.48	-0.48	N/A
GNG3	ENST00000294117.5	guanine nucleotide binding protein (G protein), gamma 3	10	1	1	0	0	0	hsa-miR-873-3p	0.0096	0.0671	0.3471	-0.47	-0.47	N/A
RHBDD2	ENST00000318622.4	rhomboid domain containing 2	1222	1	1	0	0	1	hsa-miR-873-3p	0.016	0.1102	0.5484	-0.47	-0.48	N/A
FMO2	ENST00000441535.1	flavin containing monooxygenase 2 (non-functional)	5	3	1	2	0	1	hsa-miR-873-3p	0.034	0.2374	1.2702	-0.47	-0.47	N/A
RMND1	ENST00000336451.3	required for meiotic nuclear division 1 homolog (S. cerevisiae)	11	1	1	0	0	0	hsa-miR-873-3p	0.007	0.0492	0.2768	-0.47	-0.47	N/A
PRSS1	ENST00000311737.7	protease, serine, 1 (trypsin 1)	5	1	0	1	0	0	hsa-miR-873-3p	0.0101	0.0703	0.3586	-0.47	-0.47	N/A
ZNF396	ENST00000589332.1	zinc finger protein 396	5	2	1	1	0	0	hsa-miR-873-3p	0.0172	0.1203	0.6406	-0.47	-0.47	N/A
LZTFL1	ENST00000539217.1	leucine zipper transcription factor-like 1	593	2	1	1	0	0	hsa-miR-873-3p	0.022	0.1518	0.7647	-0.47	-0.48	N/A
FETUB	ENST00000539949.1	fetuin B	13	1	1	0	0	0	hsa-miR-873-3p	0.0133	0.0917	0.4636	-0.46	-0.46	N/A
VKORC1L1	ENST00000360768.3	vitamin K epoxide reductase complex, subunit 1-like 1	2291	1	1	0	0	0	hsa-miR-873-3p	0.0238	0.155	0.6217	-0.46	-0.46	N/A
C16orf54	ENST00000329410.3	chromosome 16 open reading frame 54	5	2	1	1	0	0	hsa-miR-873-3p	0.0345	0.2336	1.0951	-0.45	-0.45	N/A
COQ5	ENST00000288532.6	coenzyme Q5 homolog, methyltransferase (S. cerevisiae)	295	1	1	0	0	0	hsa-miR-873-3p	0.0188	0.1246	0.5245	-0.45	-0.45	N/A
IL17D	ENST00000304920.3	interleukin 17D	130	1	1	0	0	0	hsa-miR-873-3p	0.0229	0.1497	0.605	-0.45	-0.45	N/A
EFEMP1	ENST00000394555.2	EGF containing fibulin-like extracellular matrix protein 1	992	1	1	0	0	0	hsa-miR-873-3p	0.0137	0.0943	0.4676	-0.45	-0.45	N/A
C10orf111	ENST00000378207.3	chromosome 10 open reading frame 111	5	1	1	0	0	0	hsa-miR-873-3p	0.0112	0.0772	0.3821	-0.45	-0.45	N/A
VGLL2	ENST00000352536.3	vestigial like 2 (Drosophila)	5	2	1	0	1	1	hsa-miR-873-3p	0.016	0.1111	0.5716	-0.44	-0.48	N/A
SRL	ENST00000399609.3	sarcalumenin	5	3	1	2	0	2	hsa-miR-873-3p	0.0311	0.2171	1.1626	-0.44	-0.44	N/A
MTFR1L	ENST00000474295.1	mitochondrial fission regulator 1-like	3051	1	1	0	0	0	hsa-miR-873-3p	0.028	0.1784	0.6691	-0.44	-0.44	N/A
PSMC3	ENST00000602866.1	proteasome (prosome, macropain) 26S subunit, ATPase, 3	241	1	1	0	0	0	hsa-miR-873-3p	0.0047	0.0336	0.2046	-0.43	-0.43	N/A
KRT23	ENST00000209718.3	keratin 23 (histone deacetylase inducible)	5	1	1	0	0	0	hsa-miR-873-3p	0.0124	0.0852	0.4242	-0.43	-0.43	N/A
RP11-113D6.10	ENST00000527059.1	Putative mitochondrial carrier protein LOC494141	5	1	1	0	0	1	hsa-miR-873-3p	0.0176	0.1186	0.5475	-0.43	-0.43	N/A
AC016559.1	ENST00000594347.1	Uncharacterized protein	15	4	0	3	1	3	hsa-miR-873-3p	0.035	0.2432	1.3068	-0.43	-0.43	N/A
CC2D2A	ENST00000511544.1	coiled-coil and C2 domain containing 2A	76	1	1	0	0	0	hsa-miR-873-3p	0.014	0.0951	0.4456	-0.42	-0.42	N/A
INTS4	ENST00000534064.1	integrator complex subunit 4	43	1	1	0	0	0	hsa-miR-873-3p	0.014	0.0973	0.5054	-0.41	-0.41	N/A
SWT1	ENST00000367500.4	SWT1 RNA endoribonuclease homolog (S. cerevisiae)	104	1	1	0	0	0	hsa-miR-873-3p	0.0192	0.1318	0.6563	-0.41	-0.41	N/A
PPP5D1	ENST00000414155.1	PPP5 tetratricopeptide repeat domain containing 1	5	1	1	0	0	0	hsa-miR-873-3p	0.0071	0.0504	0.2816	-0.41	-0.41	N/A
ZNF684	ENST00000372699.3	zinc finger protein 684	219	1	1	0	0	1	hsa-miR-873-3p	0.0124	0.0869	0.4735	-0.41	-0.41	N/A
HSPB7	ENST00000411503.1	heat shock 27kDa protein family, member 7 (cardiovascular)	5	1	1	0	0	1	hsa-miR-873-3p	0.0107	0.0756	0.4368	-0.41	-0.41	N/A
FAM83D	ENST00000217429.4	family with sequence similarity 83, member D	600	3	1	2	0	0	hsa-miR-873-3p	0.0056	0.0406	0.2698	-0.41	-0.56	N/A
FAM206A	ENST00000322940.6	family with sequence similarity 206, member A	266	1	1	0	0	0	hsa-miR-873-3p	0.0203	0.1339	0.5658	-0.41	-0.41	N/A
ZNF587	ENST00000339656.5	zinc finger protein 587	52	5	1	1	3	2	hsa-miR-873-3p	0.034	0.2271	1.0906	-0.4	-0.52	N/A
LRRC41	ENST00000343304.6	leucine rich repeat containing 41	1532	1	1	0	0	0	hsa-miR-873-3p	0.0145	0.0981	0.4456	-0.4	-0.4	N/A
APOL3	ENST00000397293.2	apolipoprotein L, 3	5	1	1	0	0	0	hsa-miR-873-3p	0.0177	0.1177	0.4965	-0.4	-0.4	N/A
RAD54B	ENST00000297592.5	RAD54 homolog B (S. cerevisiae)	36	2	0	1	1	0	hsa-miR-873-3p	0.0227	0.154	0.7387	-0.4	-0.42	N/A
FAM19A2	ENST00000416284.3	family with sequence similarity 19 (chemokine (C-C motif)-like), member A2	26	1	1	0	0	0	hsa-miR-873-3p	0.0159	0.1085	0.5143	-0.4	-0.4	N/A
TRMT1L	ENST00000367504.3	tRNA methyltransferase 1 homolog (S. cerevisiae)-like	410	2	1	0	1	0	hsa-miR-873-3p	0.0238	0.157	0.6826	-0.39	-0.43	N/A
INA	ENST00000369849.4	internexin neuronal intermediate filament protein, alpha	46	1	1	0	0	0	hsa-miR-873-3p	0.0094	0.0661	0.3705	-0.39	-0.39	N/A
FGFBP3	ENST00000311575.5	fibroblast growth factor binding protein 3	148	3	1	1	1	0	hsa-miR-873-3p	0.0196	0.1377	0.7451	-0.39	-0.45	N/A
BAG5	ENST00000299204.4	BCL2-associated athanogene 5	267	2	1	1	0	1	hsa-miR-873-3p	0.0169	0.1154	0.5493	-0.39	-0.56	N/A
ATXN2	ENST00000550104.1	ataxin 2	7	2	1	1	0	0	hsa-miR-873-3p	0.0358	0.2318	0.9389	-0.38	-0.38	N/A
TMPRSS5	ENST00000536856.1	transmembrane protease, serine 5	8	1	1	0	0	0	hsa-miR-873-3p	0.0094	0.0655	0.3413	-0.38	-0.38	N/A
KRTAP10-11	ENST00000334670.8	keratin associated protein 10-11	5	1	1	0	0	0	hsa-miR-873-3p	0.0167	0.1117	0.4868	-0.38	-0.38	N/A
CALB1	ENST00000265431.3	calbindin 1, 28kDa	5	1	1	0	0	1	hsa-miR-873-3p	0.0201	0.1364	0.6475	-0.38	-0.38	N/A
SNX21	ENST00000462307.1	sorting nexin family member 21	343	4	1	2	1	0	hsa-miR-873-3p	0.0342	0.2316	1.1249	-0.38	-0.46	N/A
B3GALT4	ENST00000451237.1	UDP-Gal:betaGlcNAc beta 1,3-galactosyltransferase, polypeptide 4	13	1	1	0	0	0	hsa-miR-873-3p	0.0076	0.0534	0.294	-0.38	-0.38	N/A
ZNF225	ENST00000592780.1	zinc finger protein 225	100	3	1	0	2	0	hsa-miR-873-3p	0.0143	0.1018	0.6177	-0.38	-0.45	N/A
WNT3	ENST00000225512.5	wingless-type MMTV integration site family, member 3	46	3	1	1	1	1	hsa-miR-873-3p	0.0312	0.2126	1.0243	-0.38	-0.39	N/A
UBAP1	ENST00000545103.1	ubiquitin associated protein 1	357	3	0	2	1	0	hsa-miR-873-3p	0.0224	0.1526	0.7412	-0.37	-0.38	N/A
MTRNR2L3	ENST00000543500.1	MT-RNR2-like 3	5	1	0	1	0	0	hsa-miR-873-3p	0.007	0.0492	0.2765	-0.37	-0.37	N/A
COX6B2	ENST00000590900.1	cytochrome c oxidase subunit VIb polypeptide 2 (testis)	5	1	1	0	0	0	hsa-miR-873-3p	0.0173	0.1148	0.4894	-0.37	-0.37	N/A
WWOX	ENST00000539474.2	WW domain containing oxidoreductase	48	1	1	0	0	0	hsa-miR-873-3p	0.0148	0.0987	0.4238	-0.37	-0.43	N/A
PGM3	ENST00000513973.1	phosphoglucomutase 3	707	1	1	0	0	0	hsa-miR-873-3p	0.0155	0.1062	0.5263	-0.37	-0.38	N/A
LIN7C	ENST00000278193.2	lin-7 homolog C (C. elegans)	1701	2	1	0	1	0	hsa-miR-873-3p	0.0335	0.2115	0.8043	-0.37	-0.37	N/A
ZDHHC23	ENST00000330212.3	zinc finger, DHHC-type containing 23	10	2	1	1	0	1	hsa-miR-873-3p	0.0175	0.1239	0.7019	-0.36	-0.42	N/A
MPC2	ENST00000367846.4	mitochondrial pyruvate carrier 2	1594	1	0	1	0	0	hsa-miR-873-3p	0.016	0.1064	0.4562	-0.36	-0.39	N/A
EFCC1	ENST00000436022.2	EF-hand and coiled-coil domain containing 1	5	1	1	0	0	1	hsa-miR-873-3p	0.0081	0.0579	0.3457	-0.36	-0.36	N/A
EEFSEC	ENST00000483457.1	eukaryotic elongation factor, selenocysteine-tRNA-specific	625	3	1	2	0	0	hsa-miR-873-3p	0.0229	0.1592	0.8322	-0.36	-0.36	N/A
STYK1	ENST00000075503.3	serine/threonine/tyrosine kinase 1	13	1	1	0	0	0	hsa-miR-873-3p	0.0135	0.0943	0.5087	-0.36	-0.36	N/A
PDHA2	ENST00000295266.4	pyruvate dehydrogenase (lipoamide) alpha 2	5	1	0	1	0	0	hsa-miR-873-3p	0.0106	0.0735	0.3695	-0.36	-0.36	N/A
CRISP1	ENST00000335847.4	cysteine-rich secretory protein 1	5	2	1	1	0	0	hsa-miR-873-3p	0.0125	0.0865	0.447	-0.35	-0.49	N/A
TMEM233	ENST00000426426.1	transmembrane protein 233	5	2	0	0	2	1	hsa-miR-873-3p	0.0063	0.0457	0.2957	-0.35	-0.37	N/A
FGF11	ENST00000293829.4	fibroblast growth factor 11	10	3	1	1	1	0	hsa-miR-873-3p	0.0334	0.218	0.8863	-0.35	-0.46	N/A
NRAS	ENST00000369535.4	neuroblastoma RAS viral (v-ras) oncogene homolog	551	1	1	0	0	0	hsa-miR-873-3p	0.0095	0.0676	0.3877	-0.35	-0.35	N/A
SYTL4	ENST00000372989.1	synaptotagmin-like 4	84	1	1	0	0	1	hsa-miR-873-3p	0.0122	0.0855	0.4607	-0.35	-0.35	N/A
PLOD3	ENST00000223127.3	procollagen-lysine, 2-oxoglutarate 5-dioxygenase 3	904	1	1	0	0	0	hsa-miR-873-3p	0.0048	0.0343	0.214	-0.35	-0.35	N/A
CDIP1	ENST00000564828.1	cell death-inducing p53 target 1	1857	1	1	0	0	0	hsa-miR-873-3p	0.0085	0.0605	0.3449	-0.35	-0.35	N/A
PRSS3	ENST00000342836.4	protease, serine, 3	107	1	0	1	0	0	hsa-miR-873-3p	0.0077	0.0542	0.2976	-0.34	-0.34	N/A
MRPL45	ENST00000312513.5	mitochondrial ribosomal protein L45	49	1	1	0	0	1	hsa-miR-873-3p	0.0123	0.0863	0.4777	-0.34	-0.34	N/A
RAB30	ENST00000533486.1	RAB30, member RAS oncogene family	274	3	0	1	2	0	hsa-miR-873-3p	0.0219	0.1538	0.8658	-0.34	-0.34	N/A
PODN	ENST00000371500.3	podocan	5	2	1	1	0	0	hsa-miR-873-3p	0.0278	0.1884	0.8637	-0.34	-0.34	N/A
TFRC	ENST00000540528.1	transferrin receptor	296	1	0	1	0	3	hsa-miR-873-3p	0.0196	0.1356	0.7007	-0.34	-0.36	N/A
EIF4EBP2	ENST00000373218.4	eukaryotic translation initiation factor 4E binding protein 2	690	4	1	1	2	0	hsa-miR-873-3p	0.0297	0.2025	0.9995	-0.33	-0.42	N/A
REG1B	ENST00000305089.3	regenerating islet-derived 1 beta	5	1	0	1	0	0	hsa-miR-873-3p	0.0106	0.0735	0.3696	-0.33	-0.33	N/A
KRT71	ENST00000267119.5	keratin 71	5	1	1	0	0	0	hsa-miR-873-3p	0.0151	0.1017	0.4556	-0.33	-0.33	N/A
GLIPR2	ENST00000396613.3	GLI pathogenesis-related 2	218	2	1	1	0	0	hsa-miR-873-3p	0.0116	0.0807	0.4255	-0.33	-0.68	N/A
ZFX	ENST00000539115.1	zinc finger protein, X-linked	583	1	1	0	0	0	hsa-miR-873-3p	0.0241	0.1551	0.5935	-0.33	-0.33	N/A
RNASE2	ENST00000304625.2	ribonuclease, RNase A family, 2 (liver, eosinophil-derived neurotoxin)	5	1	0	1	0	0	hsa-miR-873-3p	0.024	0.1539	0.5734	-0.32	-0.32	N/A
CHST14	ENST00000306243.5	carbohydrate (N-acetylgalactosamine 4-0) sulfotransferase 14	1143	1	1	0	0	1	hsa-miR-873-3p	0.0084	0.059	0.3166	-0.32	-0.33	N/A
EXOSC6	ENST00000435634.1	exosome component 6	42	2	1	0	1	0	hsa-miR-873-3p	0.009	0.0627	0.331	-0.32	-0.33	N/A
IFIT3	ENST00000371818.4	interferon-induced protein with tetratricopeptide repeats 3	5	1	1	0	0	0	hsa-miR-873-3p	0.0133	0.0913	0.4559	-0.32	-0.32	N/A
YWHAQ	ENST00000381844.4	tyrosine 3-monooxygenase/tryptophan 5-monooxygenase activation protein, theta polypeptide	473	1	1	0	0	0	hsa-miR-873-3p	0.0155	0.1039	0.4521	-0.32	-0.34	N/A
REG3A	ENST00000409839.3	regenerating islet-derived 3 alpha	5	1	0	1	0	0	hsa-miR-873-3p	0.0074	0.0526	0.2994	-0.32	-0.32	N/A
ZNF335	ENST00000322927.2	zinc finger protein 335	935	1	1	0	0	0	hsa-miR-873-3p	0.0067	0.0473	0.2701	-0.32	-0.32	N/A
AGAP10	ENST00000452145.2	ArfGAP with GTPase domain, ankyrin repeat and PH domain 10	5	2	0	1	1	0	hsa-miR-873-3p	0.0138	0.0972	0.5335	-0.32	-0.32	N/A
FAM107A	ENST00000464064.1	family with sequence similarity 107, member A	12	2	1	1	0	0	hsa-miR-873-3p	0.0277	0.184	0.8067	-0.32	-0.35	N/A
STK38	ENST00000229812.7	serine/threonine kinase 38	156	1	1	0	0	2	hsa-miR-873-3p	0.027	0.1819	0.8548	-0.32	-0.32	N/A
MPV17L2	ENST00000599612.2	MPV17 mitochondrial membrane protein-like 2	18	1	1	0	0	0	hsa-miR-873-3p	0.0154	0.1037	0.4608	-0.32	-0.32	N/A
KLF14	ENST00000310992.4	Kruppel-like factor 14	8	1	1	0	0	0	hsa-miR-873-3p	0.0074	0.0533	0.3285	-0.31	-0.31	N/A
DEFB121	ENST00000376314.2	defensin, beta 121	5	1	0	0	1	0	hsa-miR-873-3p	0.0018	0.0134	0.0919	-0.31	-0.31	N/A
ZDBF2	ENST00000374423.3	zinc finger, DBF-type containing 2	102	2	0	1	1	1	hsa-miR-873-3p	0.0229	0.1601	0.8875	-0.31	-0.31	N/A
OR51B5	ENST00000300773.2	olfactory receptor, family 51, subfamily B, member 5	5	1	0	0	1	0	hsa-miR-873-3p	0.0031	0.0221	0.1431	-0.31	-0.31	N/A
LYRM2	ENST00000520318.1	LYR motif containing 2	305	2	0	1	1	3	hsa-miR-873-3p	0.02	0.1439	0.9099	-0.31	-0.35	N/A
RNASE3	ENST00000304639.3	ribonuclease, RNase A family, 3	5	1	0	1	0	0	hsa-miR-873-3p	0.0226	0.1462	0.5653	-0.31	-0.31	N/A
UBE2G2	ENST00000345496.2	ubiquitin-conjugating enzyme E2G 2	681	3	1	1	1	0	hsa-miR-873-3p	0.0121	0.0866	0.5163	-0.31	-0.32	N/A
LSM11	ENST00000286307.5	LSM11, U7 small nuclear RNA associated	1458	2	0	1	1	0	hsa-miR-873-3p	0.0156	0.1109	0.6541	-0.31	-0.33	N/A
CRK	ENST00000398970.5	v-crk avian sarcoma virus CT10 oncogene homolog	1841	2	1	1	0	0	hsa-miR-873-3p	0.022	0.1513	0.7642	-0.31	-0.31	N/A
FAM25E	ENST00000411791.3	family with sequence similarity 25, member E	5	1	0	0	1	0	hsa-miR-873-3p	0.0037	0.0269	0.1703	-0.31	-0.31	N/A
AGAP9	ENST00000453919.1	ArfGAP with GTPase domain, ankyrin repeat and PH domain 9	5	3	0	1	2	1	hsa-miR-873-3p	0.014	0.0985	0.5444	-0.31	-0.32	N/A
EMC2	ENST00000220853.3	ER membrane protein complex subunit 2	756	2	0	2	0	0	hsa-miR-873-3p	0.0143	0.0973	0.4562	-0.31	-0.33	N/A
CHIA	ENST00000430615.1	chitinase, acidic	5	1	0	1	0	0	hsa-miR-873-3p	0.0062	0.0438	0.2546	-0.31	-0.31	N/A
FKTN	ENST00000223528.2	fukutin	153	3	1	0	2	1	hsa-miR-873-3p	0.0235	0.1687	1.0459	-0.31	-0.31	N/A
SPIN2A	ENST00000374908.1	spindlin family, member 2A	5	1	1	0	0	0	hsa-miR-873-3p	0.0146	0.1002	0.4926	-0.31	-0.31	N/A
HRH4	ENST00000256906.4	histamine receptor H4	5	2	0	0	2	0	hsa-miR-873-3p	0.0116	0.0843	0.5613	-0.31	-0.31	N/A
TSTD1	ENST00000318289.10	thiosulfate sulfurtransferase (rhodanese)-like domain containing 1	177	1	0	1	0	0	hsa-miR-873-3p	0.0063	0.0448	0.2574	-0.3	-0.3	N/A
AC016722.1	ENST00000409518.1	Uncharacterized protein	5	1	0	1	0	0	hsa-miR-873-3p	0.0102	0.0704	0.3589	-0.3	-0.3	N/A
CTXN2	ENST00000417307.2	cortexin 2	5	1	1	0	0	0	hsa-miR-873-3p	0.015	0.101	0.4536	-0.3	-0.3	N/A
C1orf64	ENST00000329454.2	chromosome 1 open reading frame 64	5	2	1	0	1	0	hsa-miR-873-3p	0.0163	0.1134	0.5935	-0.3	-0.3	N/A
ACBD7	ENST00000356189.5	acyl-CoA binding domain containing 7	34	2	1	0	1	0	hsa-miR-873-3p	0.0124	0.0869	0.4749	-0.3	-0.35	N/A
NME1-NME2	ENST00000512737.1	NME1-NME2 readthrough	191	1	0	1	0	1	hsa-miR-873-3p	0.0146	0.0988	0.449	-0.3	-0.3	N/A
GOSR2	ENST00000576910.2	golgi SNAP receptor complex member 2	1099	3	1	1	1	0	hsa-miR-873-3p	0.0158	0.1078	0.5378	-0.3	-0.52	N/A
ANAPC13	ENST00000510994.1	anaphase promoting complex subunit 13	443	1	0	1	0	0	hsa-miR-873-3p	0.0109	0.0754	0.376	-0.3	-0.3	N/A
AGAP7	ENST00000374095.5	ArfGAP with GTPase domain, ankyrin repeat and PH domain 7	5	2	0	1	1	0	hsa-miR-873-3p	0.0123	0.087	0.4949	-0.3	-0.3	N/A
AGAP8	ENST00000602930.1	ArfGAP with GTPase domain, ankyrin repeat and PH domain 8	5	2	0	1	1	0	hsa-miR-873-3p	0.013	0.0919	0.5161	-0.3	-0.3	N/A
TPD52L3	ENST00000344545.5	tumor protein D52-like 3	5	1	1	0	0	0	hsa-miR-873-3p	0.0189	0.127	0.5833	-0.3	-0.3	N/A
GPR39	ENST00000329321.3	G protein-coupled receptor 39	151	1	1	0	0	1	hsa-miR-873-3p	0.0127	0.0883	0.4597	-0.3	-0.32	N/A
UGT2A3	ENST00000251566.4	UDP glucuronosyltransferase 2 family, polypeptide A3	5	1	1	0	0	0	hsa-miR-873-3p	0.0084	0.0586	0.3175	-0.29	-0.29	N/A
SAE1	ENST00000392776.3	SUMO1 activating enzyme subunit 1	87	1	0	1	0	0	hsa-miR-873-3p	0.0162	0.1083	0.4681	-0.29	-0.31	N/A
TXNRD1	ENST00000378070.4	thioredoxin reductase 1	1255	3	1	2	0	0	hsa-miR-873-3p	0.0373	0.2545	1.2026	-0.29	-0.3	N/A
FRMD8	ENST00000317568.5	FERM domain containing 8	1094	2	1	1	0	0	hsa-miR-873-3p	0.0289	0.1986	1.0076	-0.29	-0.29	N/A
ERCC8	ENST00000426742.2	excision repair cross-complementing rodent repair deficiency, complementation group 8	219	1	1	0	0	0	hsa-miR-873-3p	0.0103	0.0728	0.4108	-0.29	-0.31	N/A
AGAP6	ENST00000374056.4	ArfGAP with GTPase domain, ankyrin repeat and PH domain 6	5	2	0	1	1	0	hsa-miR-873-3p	0.0124	0.0879	0.4996	-0.29	-0.29	N/A
KNTC1	ENST00000537348.1	kinetochore associated 1	437	2	1	0	1	1	hsa-miR-873-3p	0.0174	0.1197	0.61	-0.29	-0.31	N/A
DCTN3	ENST00000447983.2	dynactin 3 (p22)	1816	3	1	2	0	1	hsa-miR-873-3p	0.031	0.2155	1.1262	-0.29	-0.29	N/A
CDCA4	ENST00000336219.3	cell division cycle associated 4	194	1	1	0	0	0	hsa-miR-873-3p	0.0111	0.0753	0.3507	-0.29	-0.36	N/A
DKK2	ENST00000285311.3	dickkopf WNT signaling pathway inhibitor 2	5	1	1	0	0	0	hsa-miR-873-3p	0.0128	0.0886	0.4544	-0.29	-0.29	N/A
AGAP4	ENST00000448048.2	ArfGAP with GTPase domain, ankyrin repeat and PH domain 4	5	2	0	1	1	0	hsa-miR-873-3p	0.0137	0.0963	0.5303	-0.29	-0.29	N/A
TMEM170B	ENST00000379426.1	transmembrane protein 170B	489	3	1	0	2	1	hsa-miR-873-3p	0.0245	0.1735	1.0067	-0.29	-0.47	N/A
SLC35D2	ENST00000253270.7	solute carrier family 35 (UDP-GlcNAc/UDP-glucose transporter), member D2	223	2	1	0	1	0	hsa-miR-873-3p	0.0027	0.0195	0.1282	-0.29	-0.3	N/A
LRRN2	ENST00000367175.1	leucine rich repeat neuronal 2	12	1	1	0	0	0	hsa-miR-873-3p	0.0171	0.1143	0.5056	-0.29	-0.29	N/A
CRP	ENST00000255030.5	C-reactive protein, pentraxin-related	5	2	1	0	1	2	hsa-miR-873-3p	0.0135	0.0933	0.4732	-0.29	-0.33	N/A
USP22	ENST00000261497.4	ubiquitin specific peptidase 22	2152	2	0	1	1	2	hsa-miR-873-3p	0.021	0.1516	0.9742	-0.29	-0.29	N/A
ZPBP2	ENST00000377940.3	zona pellucida binding protein 2	5	1	1	0	0	0	hsa-miR-873-3p	0.0084	0.059	0.3167	-0.28	-0.28	N/A
TAPT1	ENST00000405303.2	transmembrane anterior posterior transformation 1	105	1	1	0	0	0	hsa-miR-873-3p	0.009	0.0628	0.3384	-0.28	-0.28	N/A
CNFN	ENST00000222032.5	cornifelin	40	1	0	1	0	0	hsa-miR-873-3p	0.0087	0.0612	0.3321	-0.28	-0.28	N/A
P4HA3	ENST00000331597.4	prolyl 4-hydroxylase, alpha polypeptide III	5	1	1	0	0	0	hsa-miR-873-3p	0.0253	0.1625	0.6178	-0.28	-0.28	N/A
METTL23	ENST00000588783.1	methyltransferase like 23	33	1	0	1	0	0	hsa-miR-873-3p	0.0127	0.0866	0.4121	-0.28	-0.28	N/A
RNF223	ENST00000453464.2	ring finger protein 223	5	1	1	0	0	0	hsa-miR-873-3p	0.0201	0.1325	0.5521	-0.28	-0.28	N/A
EMB	ENST00000303221.5	embigin	17	3	0	2	1	2	hsa-miR-873-3p	0.0337	0.2269	1.0815	-0.28	-0.3	N/A
DBNDD2	ENST00000372722.3	dysbindin (dystrobrevin binding protein 1) domain containing 2	730	1	0	1	0	0	hsa-miR-873-3p	0.0093	0.0648	0.3387	-0.28	-0.28	N/A
KIAA1244	ENST00000251691.4	KIAA1244	169	4	0	3	1	1	hsa-miR-873-3p	0.0449	0.3177	1.8165	-0.28	-0.3	N/A
SLC30A4	ENST00000261867.4	solute carrier family 30 (zinc transporter), member 4	19	3	0	2	1	1	hsa-miR-873-3p	0.0302	0.2063	1.0056	-0.28	-0.33	N/A
C7orf65	ENST00000408988.2	chromosome 7 open reading frame 65	5	1	1	0	0	0	hsa-miR-873-3p	0.015	0.1035	0.5199	-0.28	-0.28	N/A
AGAP5	ENST00000374094.4	ArfGAP with GTPase domain, ankyrin repeat and PH domain 5	5	2	0	1	1	0	hsa-miR-873-3p	0.0138	0.0969	0.5333	-0.28	-0.28	N/A
C10orf113	ENST00000529198.1	chromosome 10 open reading frame 113	5	1	0	1	0	0	hsa-miR-873-3p	0.0067	0.0478	0.2704	-0.28	-0.28	N/A
LINC00632	ENST00000370535.3	long intergenic non-protein coding RNA 632	5	1	1	0	0	0	hsa-miR-873-3p	0.0066	0.0469	0.2666	-0.28	-0.28	N/A
ZBED3	ENST00000255198.2	zinc finger, BED-type containing 3	399	4	0	4	0	1	hsa-miR-873-3p	0.0442	0.3082	1.6221	-0.28	-0.43	N/A
VAPB	ENST00000395802.3	VAMP (vesicle-associated membrane protein)-associated protein B and C	391	2	0	2	0	1	hsa-miR-873-3p	0.0401	0.2609	1.0403	-0.28	-0.32	N/A
SNIP1	ENST00000296215.6	Smad nuclear interacting protein 1	355	1	1	0	0	1	hsa-miR-873-3p	0.0276	0.1774	0.6972	-0.28	-0.28	N/A
CCR4	ENST00000330953.5	chemokine (C-C motif) receptor 4	5	2	0	1	1	0	hsa-miR-873-3p	0.0246	0.1619	0.6949	-0.27	-0.27	N/A
ADIPOQ	ENST00000412955.2	adiponectin, C1Q and collagen domain containing	5	3	1	1	1	0	hsa-miR-873-3p	0.0219	0.1519	0.7766	-0.27	-0.27	N/A
BRPF3	ENST00000534400.1	bromodomain and PHD finger containing, 3	7032	1	0	0	1	2	hsa-miR-873-3p	0.0138	0.1004	0.6621	-0.27	-0.27	N/A
SLITRK5	ENST00000325089.6	SLIT and NTRK-like family, member 5	429	1	1	0	0	1	hsa-miR-873-3p	0.0163	0.1138	0.6116	-0.27	-0.28	N/A
TRPV1	ENST00000399759.3	transient receptor potential cation channel, subfamily V, member 1	10	3	0	3	0	0	hsa-miR-873-3p	0.0367	0.2493	1.1749	-0.27	-0.27	N/A
PPM1M	ENST00000296487.4	protein phosphatase, Mg2+/Mn2+ dependent, 1M	5	1	1	0	0	0	hsa-miR-873-3p	0.0143	0.0975	0.4573	-0.27	-0.27	N/A
SHPK	ENST00000572705.1	transient receptor potential cation channel subfamily V member 1	10	3	0	3	0	0	hsa-miR-873-3p	0.0367	0.2493	1.1749	-0.27	-0.27	N/A
FAM26E	ENST00000368599.3	family with sequence similarity 26, member E	32	4	0	3	1	2	hsa-miR-873-3p	0.0184	0.1299	0.7454	-0.27	-0.35	N/A
DPAGT1	ENST00000409993.2	dolichyl-phosphate (UDP-N-acetylglucosamine) N-acetylglucosaminephosphotransferase 1 (GlcNAc-1-P transferase)	936	1	0	1	0	0	hsa-miR-873-3p	0.0124	0.0848	0.4065	-0.27	-0.27	N/A
DHRS1	ENST00000288111.7	dehydrogenase/reductase (SDR family) member 1	82	1	0	0	1	0	hsa-miR-873-3p	0.005	0.0364	0.2338	-0.27	-0.27	N/A
GHR	ENST00000230882.4	growth hormone receptor	102	2	1	1	0	1	hsa-miR-873-3p	0.0299	0.1911	0.7498	-0.27	-0.29	N/A
ZNF419	ENST00000415379.2	zinc finger protein 419	42	1	1	0	0	1	hsa-miR-873-3p	0.0115	0.0803	0.4233	-0.27	-0.27	N/A
GSTA4	ENST00000541324.1	glutathione S-transferase alpha 4	1890	1	0	1	0	0	hsa-miR-873-3p	0.0125	0.0853	0.408	-0.27	-0.27	N/A
SAMD5	ENST00000367474.1	sterile alpha motif domain containing 5	28	1	1	0	0	1	hsa-miR-873-3p	0.0222	0.149	0.6834	-0.26	-0.26	N/A
ELF3	ENST00000367284.5	E74-like factor 3 (ets domain transcription factor, epithelial-specific )	231	2	1	0	1	0	hsa-miR-873-3p	0.0137	0.0931	0.4345	-0.26	-0.35	N/A
EARS2	ENST00000449606.1	glutamyl-tRNA synthetase 2, mitochondrial	394	1	1	0	0	0	hsa-miR-873-3p	0.0173	0.1155	0.505	-0.26	-0.27	N/A
COPS5	ENST00000517736.1	COP9 signalosome subunit 5	129	1	0	1	0	0	hsa-miR-873-3p	0.0176	0.1213	0.611	-0.26	-0.26	N/A
SYNJ2BP	ENST00000256366.4	synaptojanin 2 binding protein	329	2	1	1	0	0	hsa-miR-873-3p	0.0184	0.1264	0.6261	-0.26	-0.34	N/A
GLRX5	ENST00000331334.4	glutaredoxin 5	6308	2	0	1	1	0	hsa-miR-873-3p	0.0102	0.0708	0.361	-0.26	-0.45	N/A
SAMD15	ENST00000216471.4	sterile alpha motif domain containing 15	5	2	1	0	1	0	hsa-miR-873-3p	0.0091	0.0649	0.3792	-0.26	-0.27	N/A
CDKN2D	ENST00000393599.2	cyclin-dependent kinase inhibitor 2D (p19, inhibits CDK4)	186	1	0	1	0	0	hsa-miR-873-3p	0.0061	0.0436	0.253	-0.26	-0.26	N/A
OSTM1	ENST00000193322.3	osteopetrosis associated transmembrane protein 1	63	2	0	1	1	0	hsa-miR-873-3p	0.0151	0.1068	0.6051	-0.26	-0.27	N/A
EML4	ENST00000318522.5	echinoderm microtubule associated protein like 4	62	1	0	1	0	0	hsa-miR-873-3p	0.0186	0.1312	0.7297	-0.26	-0.26	N/A
KIRREL	ENST00000368172.1	kin of IRRE like (Drosophila)	493	3	0	2	1	1	hsa-miR-873-3p	0.0301	0.2062	1.0315	-0.26	-0.27	N/A
GPR68	ENST00000531499.2	G protein-coupled receptor 68	5	2	1	1	0	0	hsa-miR-873-3p	0.0229	0.1523	0.6692	-0.26	-0.26	N/A
HOXA1	ENST00000355633.5	homeobox A1	157	1	0	1	0	0	hsa-miR-873-3p	0.0164	0.1094	0.4759	-0.26	-0.26	N/A
RAB42	ENST00000373826.3	RAB42, member RAS oncogene family	11	1	0	1	0	0	hsa-miR-873-3p	0.018	0.1195	0.506	-0.26	-0.26	N/A
SBK2	ENST00000413299.1	SH3 domain binding kinase family, member 2	0	2	1	0	1	1	hsa-miR-873-3p	0.0103	0.0733	0.4241	-0.26	-0.26	N/A
GREM1	ENST00000560677.1	gremlin 1, DAN family BMP antagonist	752	2	0	1	1	1	hsa-miR-873-3p	0.0141	0.0989	0.5317	-0.25	-0.4	N/A
PCTP	ENST00000576183.1	phosphatidylcholine transfer protein	476	1	1	0	0	0	hsa-miR-873-3p	0.0115	0.0788	0.3773	-0.25	-0.28	N/A
PEA15	ENST00000360472.4	phosphoprotein enriched in astrocytes 15	5239	1	1	0	0	1	hsa-miR-873-3p	0.012	0.0839	0.4546	-0.25	-0.29	N/A
AC079341.1	ENST00000424958.1	Uncharacterized protein	5	1	0	0	1	0	hsa-miR-873-3p	0.0039	0.028	0.1825	-0.25	-0.25	N/A
POLR2J3	ENST00000379357.5	polymerase (RNA) II (DNA directed) polypeptide J3	6	2	0	1	1	0	hsa-miR-873-3p	0.0042	0.0306	0.1947	-0.25	-0.25	N/A
TFEC	ENST00000265440.7	transcription factor EC	5	2	0	2	0	1	hsa-miR-873-3p	0.0307	0.2114	1.0659	-0.25	-0.25	N/A
LITAF	ENST00000413364.2	lipopolysaccharide-induced TNF factor	11008	2	1	0	1	1	hsa-miR-873-3p	0.0062	0.0447	0.2883	-0.25	-0.27	N/A
ZNF224	ENST00000336976.6	zinc finger protein 224	173	2	1	0	1	0	hsa-miR-873-3p	0.0143	0.1007	0.5595	-0.25	-0.28	N/A
SEPN1	ENST00000361547.2	selenoprotein N, 1	104	3	1	1	1	0	hsa-miR-873-3p	0.0152	0.1088	0.6654	-0.25	-0.26	N/A
GNPDA2	ENST00000509756.1	glucosamine-6-phosphate deaminase 2	117	1	0	1	0	0	hsa-miR-873-3p	0.0094	0.0663	0.3645	-0.25	-0.25	N/A
TBC1D10C	ENST00000526387.1	TBC1 domain family, member 10C	5	1	1	0	0	0	hsa-miR-873-3p	0.0062	0.0442	0.2545	-0.25	-0.25	N/A
ATXN10	ENST00000252934.5	ataxin 10	4734	2	1	1	0	0	hsa-miR-873-3p	0.0112	0.0779	0.4087	-0.25	-0.5	N/A
MRFAP1L1	ENST00000320848.6	Morf4 family associated protein 1-like 1	77	1	0	1	0	1	hsa-miR-873-3p	0.0233	0.1537	0.6564	-0.25	-0.25	N/A
RWDD2A	ENST00000369724.4	RWD domain containing 2A	286	3	0	2	1	0	hsa-miR-873-3p	0.0304	0.2041	0.9261	-0.25	-0.3	N/A
FUNDC1	ENST00000378045.4	FUN14 domain containing 1	73	1	0	1	0	1	hsa-miR-873-3p	0.0036	0.0261	0.1735	-0.25	-0.25	N/A
C2orf72	ENST00000373640.4	chromosome 2 open reading frame 72	3885	4	1	2	1	0	hsa-miR-873-3p	0.0391	0.2582	1.0834	-0.25	-0.42	N/A
SRSF1	ENST00000258962.4	serine/arginine-rich splicing factor 1	1430	5	0	2	3	3	hsa-miR-873-3p	0.0194	0.1376	0.8028	-0.25	-0.51	N/A
LGALS9C	ENST00000328114.6	lectin, galactoside-binding, soluble, 9C	5	1	1	0	0	0	hsa-miR-873-3p	0.012	0.0823	0.3985	-0.25	-0.25	N/A
DPP4	ENST00000360534.3	dipeptidyl-peptidase 4	49	1	1	0	0	0	hsa-miR-873-3p	0.0298	0.1848	0.6262	-0.25	-0.25	N/A
DCX	ENST00000356915.2	doublecortin	5	4	0	3	1	2	hsa-miR-873-3p	0.0581	0.4006	2.071	-0.25	-0.25	N/A
OR7A17	ENST00000327462.2	olfactory receptor, family 7, subfamily A, member 17	5	1	0	0	1	0	hsa-miR-873-3p	0.0023	0.0166	0.1125	-0.25	-0.25	N/A
SHISA2	ENST00000319420.3	shisa family member 2	30	1	1	0	0	0	hsa-miR-873-3p	0.0239	0.156	0.6342	-0.25	-0.25	N/A
TAB2	ENST00000367456.1	TGF-beta activated kinase 1/MAP3K7 binding protein 2	1129	1	1	0	0	1	hsa-miR-873-3p	0.027	0.1762	0.7295	-0.25	-0.25	N/A
CDC37L1	ENST00000381854.3	cell division cycle 37-like 1	280	1	0	1	0	0	hsa-miR-873-3p	0.0115	0.0794	0.3909	-0.25	-0.25	N/A
ZNF24	ENST00000589881.1	zinc finger protein 24	1796	1	0	1	0	2	hsa-miR-873-3p	0.0248	0.1742	0.9691	-0.25	-0.25	N/A
DMRTC1	ENST00000290273.5	DMRT-like family C1	5	1	0	1	0	0	hsa-miR-873-3p	0.0108	0.0757	0.4089	-0.24	-0.24	N/A
POU3F2	ENST00000328345.5	POU class 3 homeobox 2	274	2	0	1	1	0	hsa-miR-873-3p	0.0107	0.0758	0.4326	-0.24	-0.25	N/A
ZFP69B	ENST00000484445.1	ZFP69 zinc finger protein B	176	2	1	1	0	0	hsa-miR-873-3p	0.0291	0.1985	0.9706	-0.24	-0.25	N/A
IL13RA2	ENST00000371936.1	interleukin 13 receptor, alpha 2	5	1	0	0	1	0	hsa-miR-873-3p	0.0024	0.0173	0.1162	-0.24	-0.24	N/A
PPCS	ENST00000372556.3	phosphopantothenoylcysteine synthetase	491	1	0	1	0	0	hsa-miR-873-3p	0.0083	0.0583	0.3145	-0.24	-0.24	N/A
N4BP2L1	ENST00000380139.4	NEDD4 binding protein 2-like 1	92	1	0	1	0	0	hsa-miR-873-3p	0.0148	0.0998	0.453	-0.24	-0.24	N/A
MARCH7	ENST00000259050.4	membrane-associated ring finger (C3HC4) 7, E3 ubiquitin protein ligase	537	1	1	0	0	0	hsa-miR-873-3p	0.0103	0.0719	0.3702	-0.24	-0.26	N/A
RSL1D1	ENST00000571133.1	ribosomal L1 domain containing 1	140	2	2	0	0	1	hsa-miR-873-3p	0.0202	0.141	0.7596	-0.24	-0.25	N/A
T	ENST00000296946.2	T, brachyury homolog (mouse)	23	1	1	0	0	0	hsa-miR-873-3p	0.0049	0.0352	0.2124	-0.24	-0.24	N/A
KRTAP11-1	ENST00000332378.4	keratin associated protein 11-1	5	1	0	1	0	0	hsa-miR-873-3p	0.0119	0.0824	0.4201	-0.24	-0.24	N/A
ICMT	ENST00000343813.5	isoprenylcysteine carboxyl methyltransferase	558	1	1	0	0	0	hsa-miR-873-3p	0.0093	0.0657	0.3594	-0.24	-0.24	N/A
UPK3BL	ENST00000340457.8	uroplakin 3B-like	5	2	0	1	1	0	hsa-miR-873-3p	0.0042	0.0302	0.1926	-0.24	-0.24	N/A
C9orf114	ENST00000361256.5	chromosome 9 open reading frame 114	488	2	1	1	0	1	hsa-miR-873-3p	0.0129	0.0882	0.4208	-0.24	-0.26	N/A
CES4A	ENST00000540947.2	carboxylesterase 4A	30	2	1	1	0	1	hsa-miR-873-3p	0.0198	0.1391	0.7809	-0.24	-0.24	N/A
HSPB6	ENST00000587965.1	heat shock protein, alpha-crystallin-related, B6	121	1	1	0	0	0	hsa-miR-873-3p	0.0147	0.0999	0.466	-0.24	-0.25	N/A
NAA15	ENST00000296543.5	N(alpha)-acetyltransferase 15, NatA auxiliary subunit	546	1	1	0	0	0	hsa-miR-873-3p	0.018	0.1215	0.5663	-0.24	-0.24	N/A
RAD51B	ENST00000487861.1	RAD51 paralog B	20	2	1	1	0	0	hsa-miR-873-3p	0.0104	0.0721	0.379	-0.24	-0.33	N/A
SPRTN	ENST00000391858.4	SprT-like N-terminal domain	1128	3	0	1	2	0	hsa-miR-873-3p	0.0203	0.1364	0.632	-0.24	-0.26	N/A
TMEM154	ENST00000304385.3	transmembrane protein 154	5	4	0	0	4	0	hsa-miR-873-3p	0.0192	0.1401	0.9427	-0.24	-0.24	N/A
HTR2C	ENST00000371950.3	5-hydroxytryptamine (serotonin) receptor 2C, G protein-coupled	5	1	0	1	0	0	hsa-miR-873-3p	0.0157	0.1075	0.5268	-0.24	-0.24	N/A
DDB1	ENST00000301764.7	damage-specific DNA binding protein 1, 127kDa	22506	2	1	1	0	0	hsa-miR-873-3p	0.0103	0.0723	0.3839	-0.24	-0.32	N/A
TMEM33	ENST00000504986.1	transmembrane protein 33	1470	2	2	0	0	0	hsa-miR-873-3p	0.0134	0.0932	0.4873	-0.24	-0.35	N/A
LPL	ENST00000311322.8	lipoprotein lipase	7658	1	1	0	0	1	hsa-miR-873-3p	0.0189	0.1326	0.7284	-0.23	-0.23	N/A
BRCC3	ENST00000369462.1	BRCA1/BRCA2-containing complex, subunit 3	14	1	1	0	0	0	hsa-miR-873-3p	0.0121	0.0837	0.432	-0.23	-0.23	N/A
MOB1B	ENST00000309395.2	MOB kinase activator 1B	54	2	0	2	0	0	hsa-miR-873-3p	0.0209	0.1458	0.7765	-0.23	-0.24	N/A
BTD	ENST00000303498.5	biotinidase	183	6	0	0	6	0	hsa-miR-873-3p	0.0169	0.1221	0.7686	-0.23	-0.34	N/A
HSPH1	ENST00000320027.5	heat shock 105kDa/110kDa protein 1	4109	1	1	0	0	0	hsa-miR-873-3p	0.0108	0.0773	0.4551	-0.23	-0.24	N/A
USP10	ENST00000219473.7	ubiquitin specific peptidase 10	66	1	1	0	0	0	hsa-miR-873-3p	0.0094	0.0655	0.3483	-0.23	-0.23	N/A
AGXT2	ENST00000231420.6	alanine--glyoxylate aminotransferase 2	75	1	0	0	1	1	hsa-miR-873-3p	0.005	0.036	0.2246	-0.23	-0.23	N/A
ACIN1	ENST00000557515.1	apoptotic chromatin condensation inducer 1	141	2	0	2	0	0	hsa-miR-873-3p	0.0177	0.1235	0.6422	-0.23	-0.23	N/A
HLA-DMB	ENST00000418107.2	major histocompatibility complex, class II, DM beta	61	1	0	1	0	0	hsa-miR-873-3p	0.0125	0.0854	0.4084	-0.23	-0.23	N/A
MTRF1L	ENST00000367231.5	mitochondrial translational release factor 1-like	7	2	0	2	0	0	hsa-miR-873-3p	0.0313	0.2122	0.9862	-0.23	-0.23	N/A
GDPD5	ENST00000443276.2	glycerophosphodiester phosphodiesterase domain containing 5	8	1	1	0	0	0	hsa-miR-873-3p	0.0093	0.0657	0.3734	-0.23	-0.23	N/A
YPEL2	ENST00000312655.4	yippee-like 2 (Drosophila)	62	3	0	1	2	0	hsa-miR-873-3p	0.0335	0.2228	1.0068	-0.23	-0.23	N/A
AC079210.1	ENST00000600820.1	Uncharacterized protein; cDNA FLJ45097 fis, clone BRAWH3031054	5	1	1	0	0	0	hsa-miR-873-3p	0.0124	0.0857	0.4427	-0.23	-0.23	N/A
SLC39A9	ENST00000031146.4	solute carrier family 39, member 9	824	2	0	1	1	0	hsa-miR-873-3p	0.0146	0.1004	0.4999	-0.23	-0.24	N/A
AC022431.2	ENST00000438651.1	Uncharacterized protein	5	1	0	1	0	0	hsa-miR-873-3p	0.0084	0.0593	0.3192	-0.23	-0.23	N/A
LGALS9B	ENST00000423676.3	lectin, galactoside-binding, soluble, 9B	5	1	1	0	0	0	hsa-miR-873-3p	0.012	0.0823	0.3985	-0.23	-0.23	N/A
BDP1	ENST00000380675.2	B double prime 1, subunit of RNA polymerase III transcription initiation factor IIIB	12	3	0	1	2	1	hsa-miR-873-3p	0.0193	0.1326	0.6806	-0.23	-0.24	N/A
MIER3	ENST00000381226.3	mesoderm induction early response 1, family member 3	112	1	0	1	0	1	hsa-miR-873-3p	0.0197	0.134	0.6406	-0.23	-0.24	N/A
MXI1	ENST00000332674.5	MAX interactor 1, dimerization protein	278	2	0	2	0	0	hsa-miR-873-3p	0.0209	0.1433	0.7138	-0.23	-0.24	N/A
TRAPPC1	ENST00000540486.1	trafficking protein particle complex 1	551	1	0	0	1	0	hsa-miR-873-3p	0.0008	0.006	0.043	-0.23	-0.23	N/A
RNF122	ENST00000256257.1	ring finger protein 122	16	1	0	1	0	0	hsa-miR-873-3p	0.0117	0.0802	0.3925	-0.23	-0.23	N/A
BCAS3	ENST00000589222.1	breast carcinoma amplified sequence 3	339	1	0	1	0	0	hsa-miR-873-3p	0.0225	0.157	0.8379	-0.23	-0.23	N/A
MYL6	ENST00000348108.4	myosin, light chain 6, alkali, smooth muscle and non-muscle	55734	1	0	1	0	0	hsa-miR-873-3p	0.0098	0.0692	0.3823	-0.23	-0.23	N/A
PLEKHF2	ENST00000315367.3	pleckstrin homology domain containing, family F (with FYVE domain) member 2	286	1	0	1	0	0	hsa-miR-873-3p	0.0192	0.1281	0.5806	-0.23	-0.28	N/A
CDIPT	ENST00000563415.1	CDP-diacylglycerol--inositol 3-phosphatidyltransferase	183	2	2	0	0	0	hsa-miR-873-3p	0.0064	0.0456	0.2617	-0.23	-0.41	N/A
HPCA	ENST00000373467.3	hippocalcin	5	1	0	0	1	0	hsa-miR-873-3p	0.0051	0.037	0.2391	-0.23	-0.23	N/A
PRRC2C	ENST00000367742.3	proline-rich coiled-coil 2C	5	1	0	0	1	0	hsa-miR-873-3p	0.0131	0.0952	0.6141	-0.23	-0.23	N/A
COLCA1	ENST00000532918.1	colorectal cancer associated 1	5	1	0	1	0	1	hsa-miR-873-3p	0.0151	0.1064	0.5992	-0.23	-0.23	N/A
DMRTC1B	ENST00000373532.3	DMRT-like family C1B	5	1	0	1	0	0	hsa-miR-873-3p	0.011	0.0773	0.4201	-0.23	-0.23	N/A
CAMK2N1	ENST00000375078.3	calcium/calmodulin-dependent protein kinase II inhibitor 1	6631	1	0	0	1	1	hsa-miR-873-3p	0.0042	0.0306	0.1938	-0.23	-0.24	N/A
MAPK3	ENST00000403394.1	mitogen-activated protein kinase 3	271	2	0	1	1	0	hsa-miR-873-3p	0.0234	0.1598	0.7826	-0.23	-0.23	N/A
TCEAL3	ENST00000372628.1	transcription elongation factor A (SII)-like 3	23	1	0	1	0	0	hsa-miR-873-3p	0.0048	0.0344	0.2082	-0.23	-0.23	N/A
KRTAP13-2	ENST00000399889.2	keratin associated protein 13-2	5	1	0	1	0	0	hsa-miR-873-3p	0.006	0.0434	0.2702	-0.22	-0.22	N/A
SLFN11	ENST00000308377.4	schlafen family member 11	402	2	0	2	0	0	hsa-miR-873-3p	0.0283	0.1919	0.8986	-0.22	-0.22	N/A
RNF11	ENST00000242719.3	ring finger protein 11	5881	3	0	1	2	0	hsa-miR-873-3p	0.0183	0.1254	0.6148	-0.22	-0.24	N/A
RBM8A	ENST00000330165.8	RNA binding motif protein 8A	33	4	2	0	2	0	hsa-miR-873-3p	0.016	0.1119	0.6254	-0.22	-0.37	N/A
CCDC163P	ENST00000490551.3	coiled-coil domain containing 163, pseudogene	128	1	0	1	0	0	hsa-miR-873-3p	0.0092	0.0642	0.3441	-0.22	-0.23	N/A
PEX5L	ENST00000467460.1	peroxisomal biogenesis factor 5-like	5	4	2	1	1	0	hsa-miR-873-3p	0.0432	0.3004	1.6006	-0.22	-0.22	N/A
ADH6	ENST00000394897.1	alcohol dehydrogenase 6 (class V)	17	2	1	1	0	0	hsa-miR-873-3p	0.0171	0.118	0.5909	-0.22	-0.31	N/A
ZSWIM7	ENST00000486655.1	zinc finger, SWIM-type containing 7	656	2	0	1	1	0	hsa-miR-873-3p	0.0067	0.0481	0.3034	-0.22	-0.29	N/A
EMP2	ENST00000359543.3	epithelial membrane protein 2	1725	2	0	0	2	1	hsa-miR-873-3p	0.0083	0.0603	0.396	-0.22	-0.22	N/A
PHLDA1	ENST00000602540.1	pleckstrin homology-like domain, family A, member 1	3907	1	0	1	0	1	hsa-miR-873-3p	0.0185	0.123	0.5264	-0.22	-0.22	N/A
SFRP2	ENST00000274063.4	secreted frizzled-related protein 2	21	1	1	0	0	0	hsa-miR-873-3p	0.0067	0.0473	0.2683	-0.22	-0.22	N/A
NME2	ENST00000376392.6	NME/NM23 nucleoside diphosphate kinase 2	191	1	0	1	0	1	hsa-miR-873-3p	0.0146	0.0988	0.449	-0.22	-0.22	N/A
BCCIP	ENST00000368759.5	BRCA2 and CDKN1A interacting protein	869	1	0	0	1	1	hsa-miR-873-3p	0.0078	0.0562	0.3425	-0.22	-0.22	N/A
CNOT4	ENST00000541284.1	CCR4-NOT transcription complex, subunit 4	27	1	1	0	0	0	hsa-miR-873-3p	0.0036	0.0261	0.1686	-0.22	-0.22	N/A
HES7	ENST00000541682.2	hairy and enhancer of split 7 (Drosophila)	416	2	0	2	0	1	hsa-miR-873-3p	0.0157	0.1118	0.6605	-0.22	-0.23	N/A
SYNGR2	ENST00000589711.1	synaptogyrin 2	466	1	0	1	0	0	hsa-miR-873-3p	0.0084	0.0591	0.3156	-0.22	-0.22	N/A
RAB35	ENST00000534951.1	RAB35, member RAS oncogene family	1051	1	1	0	0	0	hsa-miR-873-3p	0.0117	0.0827	0.4664	-0.22	-0.22	N/A
ELOVL1	ENST00000372458.3	ELOVL fatty acid elongase 1	188	1	1	0	0	0	hsa-miR-873-3p	0.0054	0.039	0.2359	-0.22	-0.22	N/A
KIAA1456	ENST00000524591.2	KIAA1456	24	3	3	0	0	3	hsa-miR-873-3p	0.0336	0.2344	1.2655	-0.22	-0.25	N/A
PPM1D	ENST00000305921.3	protein phosphatase, Mg2+/Mn2+ dependent, 1D	896	2	0	1	1	2	hsa-miR-873-3p	0.016	0.1099	0.5457	-0.22	-0.23	N/A
EIF4E	ENST00000450253.2	eukaryotic translation initiation factor 4E	876	2	0	1	1	1	hsa-miR-873-3p	0.0042	0.0306	0.2068	-0.22	-0.22	N/A
STYXL1	ENST00000360591.3	serine/threonine/tyrosine interacting-like 1	1060	1	0	0	1	0	hsa-miR-873-3p	0.0029	0.0208	0.1357	-0.22	-0.22	N/A
ARHGAP32	ENST00000524655.1	Rho GTPase activating protein 32	13	3	0	3	0	1	hsa-miR-873-3p	0.0311	0.219	1.2249	-0.22	-0.23	N/A
PDLIM3	ENST00000284770.5	PDZ and LIM domain 3	58	2	0	2	0	0	hsa-miR-873-3p	0.0075	0.0527	0.2901	-0.22	-0.34	N/A
FOXJ3	ENST00000372571.1	forkhead box J3	329	1	1	0	0	0	hsa-miR-873-3p	0.0087	0.0607	0.3226	-0.22	-0.22	N/A
NTN5	ENST00000270235.4	netrin 5	5	1	0	0	1	0	hsa-miR-873-3p	0.0033	0.0239	0.1533	-0.22	-0.22	N/A
NRIP3	ENST00000309166.3	nuclear receptor interacting protein 3	58	2	1	0	1	0	hsa-miR-873-3p	0.01	0.0718	0.4417	-0.22	-0.22	N/A
PHLDA3	ENST00000367311.3	pleckstrin homology-like domain, family A, member 3	82	3	1	1	1	1	hsa-miR-873-3p	0.0165	0.1137	0.5863	-0.22	-0.28	N/A
ROR1	ENST00000371079.1	receptor tyrosine kinase-like orphan receptor 1	80	2	0	1	1	0	hsa-miR-873-3p	0.0143	0.1005	0.5516	-0.22	-0.22	N/A
HLA-DOB	ENST00000438763.2	major histocompatibility complex, class II, DO beta	5	1	0	1	0	1	hsa-miR-873-3p	0.0142	0.0966	0.4592	-0.22	-0.22	N/A
MLF1IP	ENST00000281453.5	MLF1 interacting protein	164	1	0	0	1	0	hsa-miR-873-3p	0.0041	0.0294	0.1887	-0.21	-0.21	N/A
FCER1G	ENST00000289902.1	Fc fragment of IgE, high affinity I, receptor for; gamma polypeptide	99	1	0	0	1	0	hsa-miR-873-3p	0.0055	0.0391	0.231	-0.21	-0.21	N/A
SLC31A1	ENST00000374212.4	solute carrier family 31 (copper transporter), member 1	171	1	0	1	0	1	hsa-miR-873-3p	0.0148	0.101	0.4873	-0.21	-0.22	N/A
SH3BGRL3	ENST00000319041.6	SH3 domain binding glutamic acid-rich protein like 3	8719	1	0	0	1	0	hsa-miR-873-3p	0.007	0.0498	0.2788	-0.21	-0.22	N/A
DUSP14	ENST00000394389.4	dual specificity phosphatase 14	6641	1	0	1	0	0	hsa-miR-873-3p	0.0048	0.0346	0.2089	-0.21	-0.22	N/A
GP5	ENST00000401815.1	glycoprotein V (platelet)	5	1	1	0	0	0	hsa-miR-873-3p	0.0142	0.099	0.5346	-0.21	-0.21	N/A
KLRK1	ENST00000240618.6	killer cell lectin-like receptor subfamily K, member 1	5	1	0	0	1	0	hsa-miR-873-3p	0.0022	0.0163	0.1106	-0.21	-0.21	N/A
PATE1	ENST00000305738.5	prostate and testis expressed 1	5	1	0	1	0	0	hsa-miR-873-3p	0.0161	0.1077	0.4714	-0.21	-0.21	N/A
IL24	ENST00000367093.3	interleukin 24	10	1	0	1	0	0	hsa-miR-873-3p	0.0233	0.1497	0.5655	-0.21	-0.21	N/A
IVD	ENST00000249760.2	isovaleryl-CoA dehydrogenase	484	1	0	1	0	0	hsa-miR-873-3p	0.013	0.0898	0.4649	-0.21	-0.21	N/A
FCRLA	ENST00000367959.2	Fc receptor-like A	5	1	1	0	0	0	hsa-miR-873-3p	0.0078	0.0555	0.3135	-0.21	-0.21	N/A
C9orf57	ENST00000377024.3	chromosome 9 open reading frame 57	5	1	0	1	0	0	hsa-miR-873-3p	0.0141	0.0953	0.4377	-0.21	-0.21	N/A
AGPAT9	ENST00000395226.2	1-acylglycerol-3-phosphate O-acyltransferase 9	89	1	0	1	0	0	hsa-miR-873-3p	0.0078	0.0548	0.3038	-0.21	-0.21	N/A
PLA2G4F	ENST00000397272.3	phospholipase A2, group IVF	5	2	0	1	1	0	hsa-miR-873-3p	0.0176	0.1221	0.6315	-0.21	-0.21	N/A
CALCR	ENST00000359558.2	calcitonin receptor	5	1	1	0	0	2	hsa-miR-873-3p	0.0168	0.1154	0.5714	-0.21	-0.21	N/A
SFSWAP	ENST00000261674.4	splicing factor, suppressor of white-apricot homolog (Drosophila)	134	1	0	1	0	0	hsa-miR-873-3p	0.0081	0.0572	0.3193	-0.21	-0.21	N/A
GNLY	ENST00000263863.4	granulysin	5	1	0	1	0	0	hsa-miR-873-3p	0.0127	0.087	0.4218	-0.21	-0.21	N/A
ZNF791	ENST00000446165.1	zinc finger protein 791	242	1	1	0	0	0	hsa-miR-873-3p	0.0182	0.1232	0.5795	-0.21	-0.22	N/A
RHOU	ENST00000366691.3	ras homolog family member U	3519	1	1	0	0	0	hsa-miR-873-3p	0.0185	0.1219	0.4989	-0.21	-0.22	N/A
HIST1H2BG	ENST00000244601.3	histone cluster 1, H2bg	31	1	0	0	1	0	hsa-miR-873-3p	0.0025	0.0183	0.1217	-0.21	-0.25	N/A
FGF1	ENST00000360966.5	fibroblast growth factor 1 (acidic)	88	2	0	1	1	0	hsa-miR-873-3p	0.0043	0.0314	0.1973	-0.21	-0.3	N/A
SLC5A8	ENST00000536262.2	solute carrier family 5 (sodium/monocarboxylate cotransporter), member 8	5	1	1	0	0	0	hsa-miR-873-3p	0.0123	0.0858	0.4452	-0.21	-0.21	N/A
LOH12CR2	ENST00000381800.2	loss of heterozygosity, 12, chromosomal region 2 (non-protein coding)	8	1	0	0	1	1	hsa-miR-873-3p	0.0081	0.0589	0.3734	-0.21	-0.21	N/A
SYPL2	ENST00000369872.3	synaptophysin-like 2	69	2	0	2	0	0	hsa-miR-873-3p	0.0226	0.1559	0.7889	-0.21	-0.21	N/A
RSRC1	ENST00000464171.1	arginine/serine-rich coiled-coil 1	642	1	0	0	1	2	hsa-miR-873-3p	0.0051	0.0374	0.252	-0.21	-0.22	N/A
CLDN18	ENST00000343735.4	claudin 18	5	2	0	2	0	0	hsa-miR-873-3p	0.0215	0.15	0.7908	-0.21	-0.21	N/A
RAD23B	ENST00000358015.3	RAD23 homolog B (S. cerevisiae)	1012	1	0	1	0	0	hsa-miR-873-3p	0.019	0.1254	0.5238	-0.21	-0.21	N/A
CHIC1	ENST00000373504.6	cysteine-rich hydrophobic domain 1	16	1	1	0	0	1	hsa-miR-873-3p	0.0144	0.0987	0.4777	-0.21	-0.21	N/A
POLR2J2	ENST00000591000.1	DNA-directed RNA polymerase II subunit RPB11-b1	5	2	0	1	1	0	hsa-miR-873-3p	0.0042	0.0306	0.1942	-0.21	-0.21	N/A
SERTAD3	ENST00000392028.4	SERTA domain containing 3	765	1	1	0	0	0	hsa-miR-873-3p	0.008	0.0561	0.3082	-0.21	-0.21	N/A
ZNF417	ENST00000312026.5	zinc finger protein 417	19	3	1	0	2	1	hsa-miR-873-3p	0.0245	0.1626	0.7678	-0.21	-0.3	N/A
HNF1B	ENST00000225893.4	HNF1 homeobox B	25	2	1	1	0	0	hsa-miR-873-3p	0.0154	0.1066	0.5597	-0.21	-0.62	N/A
MRPL35	ENST00000337109.4	mitochondrial ribosomal protein L35	860	1	1	0	0	1	hsa-miR-873-3p	0.0153	0.106	0.5583	-0.21	-0.26	N/A
C1orf147	ENST00000367119.1	chromosome 1 open reading frame 147	5	2	0	2	0	0	hsa-miR-873-3p	0.0274	0.1728	0.617	-0.21	-0.21	N/A
ISOC2	ENST00000438389.2	isochorismatase domain containing 2	1602	1	0	0	1	0	hsa-miR-873-3p	0.0034	0.0247	0.1612	-0.21	-0.21	N/A
NEUROG3	ENST00000242462.4	neurogenin 3	5	1	0	1	0	0	hsa-miR-873-3p	0.0125	0.0869	0.4602	-0.21	-0.21	N/A
ACVRL1	ENST00000550683.1	activin A receptor type II-like 1	68	1	1	0	0	0	hsa-miR-873-3p	0.0148	0.0979	0.4305	-0.21	-0.36	N/A
TCP11L2	ENST00000547153.1	t-complex 11, testis-specific-like 2	29	1	0	1	0	2	hsa-miR-873-3p	0.0142	0.0997	0.5534	-0.21	-0.29	N/A
SHMT1	ENST00000316694.3	serine hydroxymethyltransferase 1 (soluble)	3432	1	0	0	1	0	hsa-miR-873-3p	0.0019	0.0141	0.0968	-0.21	-0.21	N/A
UBXN7	ENST00000296328.4	UBX domain protein 7	95	2	0	2	0	1	hsa-miR-873-3p	0.0255	0.1718	0.8022	-0.21	-0.22	N/A
IL10RB	ENST00000290200.2	interleukin 10 receptor, beta	238	1	0	1	0	0	hsa-miR-873-3p	0.0085	0.0596	0.317	-0.21	-0.21	N/A
SIRT7	ENST00000328666.6	sirtuin 7	8	1	1	0	0	0	hsa-miR-873-3p	0.0077	0.0542	0.2985	-0.2	-0.2	N/A
SETDB2	ENST00000354234.4	SET domain, bifurcated 2	70	3	0	1	2	0	hsa-miR-873-3p	0.0159	0.1127	0.6437	-0.2	-0.22	N/A
SERP1	ENST00000239944.2	stress-associated endoplasmic reticulum protein 1	3242	1	0	1	0	0	hsa-miR-873-3p	0.0208	0.1344	0.5274	-0.2	-0.24	N/A
SLMO2	ENST00000355937.4	slowmo homolog 2 (Drosophila)	374	1	0	1	0	0	hsa-miR-873-3p	0.0108	0.0746	0.3776	-0.2	-0.21	N/A
ARL9	ENST00000360096.2	ADP-ribosylation factor-like 9	5	1	0	1	0	0	hsa-miR-873-3p	0.0231	0.1486	0.5632	-0.2	-0.2	N/A
KIAA1009	ENST00000257766.4	KIAA1009	7	1	1	0	0	0	hsa-miR-873-3p	0.0147	0.1015	0.5177	-0.2	-0.2	N/A
ZNF562	ENST00000293648.4	zinc finger protein 562	130	3	0	3	0	0	hsa-miR-873-3p	0.033	0.2226	1.0723	-0.2	-0.23	N/A
F11	ENST00000264692.4	coagulation factor XI	5	1	0	1	0	0	hsa-miR-873-3p	0.0095	0.0667	0.369	-0.2	-0.2	N/A
ZBTB10	ENST00000430430.1	zinc finger and BTB domain containing 10	113	1	1	0	0	1	hsa-miR-873-3p	0.0266	0.1789	0.841	-0.2	-0.2	N/A
ZMAT3	ENST00000311417.2	zinc finger, matrin-type 3	459	1	0	1	0	0	hsa-miR-873-3p	0.0234	0.153	0.6348	-0.2	-0.2	N/A
C2orf50	ENST00000381585.3	chromosome 2 open reading frame 50	5	1	0	1	0	1	hsa-miR-873-3p	0.0185	0.1242	0.5613	-0.2	-0.2	N/A
PLEKHB1	ENST00000354190.5	pleckstrin homology domain containing, family B (evectins) member 1	529	2	0	2	0	0	hsa-miR-873-3p	0.0196	0.1366	0.7201	-0.2	-0.2	N/A
CHCHD1	ENST00000372837.3	coiled-coil-helix-coiled-coil-helix domain containing 1	97	1	0	0	1	0	hsa-miR-873-3p	0.0079	0.0557	0.3037	-0.2	-0.2	N/A
SFT2D1	ENST00000361731.3	SFT2 domain containing 1	433	1	0	0	1	0	hsa-miR-873-3p	0.0022	0.0163	0.109	-0.2	-0.2	N/A
SAMD12	ENST00000409003.4	sterile alpha motif domain containing 12	57	3	0	2	1	0	hsa-miR-873-3p	0.0214	0.1513	0.8548	-0.2	-0.2	N/A
RAB3B	ENST00000371655.3	RAB3B, member RAS oncogene family	611	4	1	2	1	1	hsa-miR-873-3p	0.0185	0.1306	0.7421	-0.2	-0.48	N/A
TIPARP	ENST00000295924.7	TCDD-inducible poly(ADP-ribose) polymerase	166	1	0	1	0	0	hsa-miR-873-3p	0.0181	0.1223	0.5773	-0.2	-0.2	N/A
FAM208A	ENST00000493960.2	family with sequence similarity 208, member A	60	1	1	0	0	2	hsa-miR-873-3p	0.0117	0.0818	0.4349	-0.2	-0.2	N/A
SLFN13	ENST00000285013.6	schlafen family member 13	11	3	0	2	1	1	hsa-miR-873-3p	0.0277	0.1978	1.1962	-0.2	-0.2	N/A
PRIMA1	ENST00000393140.1	proline rich membrane anchor 1	5	2	1	1	0	0	hsa-miR-873-3p	0.0139	0.0977	0.5444	-0.2	-0.2	N/A
CCDC60	ENST00000327554.2	coiled-coil domain containing 60	5	1	0	1	0	0	hsa-miR-873-3p	0.0107	0.0754	0.4176	-0.2	-0.2	N/A
TERT	ENST00000296820.5	telomerase reverse transcriptase	10	6	5	0	1	0	hsa-miR-873-3p	0.0324	0.2238	1.1255	-0.2	-0.35	N/A
MAP3K2	ENST00000409947.1	mitogen-activated protein kinase kinase kinase 2	187	2	1	1	0	1	hsa-miR-873-3p	0.0285	0.1979	1.0416	-0.2	-0.2	N/A
CD46	ENST00000358170.2	CD46 molecule, complement regulatory protein	5846	1	0	0	1	1	hsa-miR-873-3p	0.008	0.0581	0.3834	-0.2	-0.2	N/A
C18orf25	ENST00000282059.6	chromosome 18 open reading frame 25	688	2	0	2	0	0	hsa-miR-873-3p	0.0245	0.1653	0.7646	-0.2	-0.2	N/A
MITF	ENST00000328528.6	microphthalmia-associated transcription factor	593	1	1	0	0	0	hsa-miR-873-3p	0.0105	0.0728	0.3617	-0.2	-0.21	N/A
ZNF454	ENST00000320129.3	zinc finger protein 454	5	1	0	1	0	0	hsa-miR-873-3p	0.0174	0.1162	0.5032	-0.2	-0.2	N/A
TMEM95	ENST00000330767.4	transmembrane protein 95	5	1	0	1	0	0	hsa-miR-873-3p	0.0159	0.1069	0.4693	-0.2	-0.2	N/A
SLC25A19	ENST00000416858.2	solute carrier family 25 (mitochondrial thiamine pyrophosphate carrier), member 19	108	1	0	1	0	0	hsa-miR-873-3p	0.0112	0.0772	0.3821	-0.2	-0.2	N/A
TMEM239	ENST00000361033.1	transmembrane protein 239	5	1	1	0	0	0	hsa-miR-873-3p	0.0303	0.1925	0.7285	-0.2	-0.2	N/A
KLK6	ENST00000376851.3	kallikrein-related peptidase 6	5	1	0	1	0	0	hsa-miR-873-3p	0.0106	0.0736	0.3699	-0.2	-0.2	N/A
ZSWIM1	ENST00000372523.1	zinc finger, SWIM-type containing 1	72	1	0	1	0	0	hsa-miR-873-3p	0.0116	0.0797	0.3959	-0.2	-0.2	N/A
GIPR	ENST00000590918.1	gastric inhibitory polypeptide receptor	5	2	1	0	1	0	hsa-miR-873-3p	0.0172	0.119	0.6104	-0.2	-0.2	N/A
NANP	ENST00000304788.3	N-acetylneuraminic acid phosphatase	78	1	1	0	0	0	hsa-miR-873-3p	0.0087	0.0611	0.3295	-0.2	-0.2	N/A
BBS1	ENST00000393994.2	Bardet-Biedl syndrome 1	523	1	0	1	0	0	hsa-miR-873-3p	0.0192	0.1276	0.5491	-0.2	-0.2	N/A
KCTD19	ENST00000304372.5	potassium channel tetramerization domain containing 19	5	1	0	0	1	0	hsa-miR-873-3p	0.0033	0.0238	0.1575	-0.2	-0.2	N/A
SLC25A51	ENST00000380590.3	solute carrier family 25, member 51	170	1	0	0	1	1	hsa-miR-873-3p	0.009	0.0656	0.4374	-0.19	-0.2	N/A
C9orf53	ENST00000441769.2	chromosome 9 open reading frame 53	5	1	0	1	0	0	hsa-miR-873-3p	0.0029	0.021	0.1369	-0.19	-0.19	N/A
SIAH2	ENST00000312960.3	siah E3 ubiquitin protein ligase 2	228	1	1	0	0	0	hsa-miR-873-3p	0.016	0.0999	0.3415	-0.19	-0.38	N/A
PTCHD1	ENST00000379361.4	patched domain containing 1	59	2	0	0	2	3	hsa-miR-873-3p	0.0113	0.0823	0.5468	-0.19	-0.28	N/A
MARC1	ENST00000366910.5	mitochondrial amidoxime reducing component 1	1613	2	0	1	1	0	hsa-miR-873-3p	0.0074	0.0522	0.2967	-0.19	-0.21	N/A
SNX12	ENST00000374274.3	sorting nexin 12	849	1	0	1	0	0	hsa-miR-873-3p	0.0165	0.1107	0.4893	-0.19	-0.19	N/A
TBX4	ENST00000393853.4	T-box 4	21	1	0	1	0	0	hsa-miR-873-3p	0.0185	0.1263	0.6152	-0.19	-0.19	N/A
PRR13	ENST00000549068.1	proline rich 13	387	1	0	0	1	0	hsa-miR-873-3p	0.0059	0.0428	0.2758	-0.19	-0.19	N/A
ZBTB26	ENST00000373656.3	zinc finger and BTB domain containing 26	83	3	0	1	2	2	hsa-miR-873-3p	0.0251	0.1737	0.9067	-0.19	-0.2	N/A
HERC6	ENST00000264346.7	HECT and RLD domain containing E3 ubiquitin protein ligase family member 6	18	1	0	1	0	0	hsa-miR-873-3p	0.0111	0.0779	0.4184	-0.19	-0.19	N/A
NOP10	ENST00000557912.1	NOP10 ribonucleoprotein	14	1	0	1	0	0	hsa-miR-873-3p	0.0031	0.0225	0.1382	-0.19	-0.28	N/A
CTD-3074O7.11	ENST00000419755.3	Bardet-Biedl syndrome 1 protein	523	1	0	1	0	0	hsa-miR-873-3p	0.0193	0.1283	0.5508	-0.19	-0.19	N/A
AC138655.1	ENST00000601243.1	CDNA: FLJ23120 fis, clone LNG07989; HCG1987724; Uncharacterized protein	5	1	0	1	0	0	hsa-miR-873-3p	0.0203	0.1329	0.5312	-0.19	-0.19	N/A
ONECUT2	ENST00000491143.2	one cut homeobox 2	847	4*	0	0	3	1	hsa-miR-873-3p	0.0182	0.1325	0.8832	-0.19	-0.23	N/A
DCAF8L1	ENST00000441525.1	DDB1 and CUL4 associated factor 8-like 1	5	1	1	0	0	0	hsa-miR-873-3p	0.0113	0.0781	0.3861	-0.19	-0.19	N/A
GIF	ENST00000257248.2	gastric intrinsic factor (vitamin B synthesis)	5	1	0	0	1	0	hsa-miR-873-3p	0.0011	0.0084	0.0591	-0.19	-0.19	N/A
SLC25A40	ENST00000341119.5	solute carrier family 25, member 40	405	1	0	1	0	0	hsa-miR-873-3p	0.0085	0.0604	0.3457	-0.19	-0.19	N/A
STX12	ENST00000373943.4	syntaxin 12	1082	1	0	1	0	1	hsa-miR-873-3p	0.0136	0.0946	0.4948	-0.19	-0.19	N/A
RSPRY1	ENST00000394420.4	ring finger and SPRY domain containing 1	735	1	0	0	1	0	hsa-miR-873-3p	0.0097	0.0677	0.3631	-0.19	-0.19	N/A
GPR137	ENST00000539851.1	G protein-coupled receptor 137	202	1	0	1	0	0	hsa-miR-873-3p	0.0091	0.064	0.3406	-0.19	-0.19	N/A
MAP3K13	ENST00000448876.1	mitogen-activated protein kinase kinase kinase 13	226	1	0	0	1	0	hsa-miR-873-3p	0.0034	0.0247	0.1579	-0.19	-0.19	N/A
SULT4A1	ENST00000330884.4	sulfotransferase family 4A, member 1	25	1	0	1	0	0	hsa-miR-873-3p	0.024	0.1552	0.6123	-0.19	-0.19	N/A
AC115618.1	ENST00000376775.2	Uncharacterized protein; cDNA FLJ26048 fis, clone PRS02384	5	1	0	1	0	0	hsa-miR-873-3p	0.0171	0.1139	0.487	-0.19	-0.19	N/A
AC139100.2	ENST00000588226.1	Uncharacterized protein	55	1	0	1	0	0	hsa-miR-873-3p	0.0045	0.0322	0.2048	-0.19	-0.19	N/A
DRAM1	ENST00000258534.8	DNA-damage regulated autophagy modulator 1	4884	1	0	0	1	0	hsa-miR-873-3p	0.0066	0.0477	0.3152	-0.19	-0.19	N/A
IGFL4	ENST00000377697.1	IGF-like family member 4	5	1	0	0	1	0	hsa-miR-873-3p	0.0006	0.0043	0.0307	-0.19	-0.19	N/A
KCNK12	ENST00000327876.4	potassium channel, subfamily K, member 12	5	3	1	0	2	0	hsa-miR-873-3p	0.0188	0.1312	0.7119	-0.19	-0.19	N/A
CGREF1	ENST00000402394.1	cell growth regulator with EF-hand domain 1	56	1	0	0	1	0	hsa-miR-873-3p	0.0034	0.0245	0.158	-0.19	-0.19	N/A
NARS2	ENST00000281038.5	asparaginyl-tRNA synthetase 2, mitochondrial (putative)	65	1	0	0	1	0	hsa-miR-873-3p	0.0068	0.0484	0.2887	-0.19	-0.19	N/A
RRP36	ENST00000244496.5	ribosomal RNA processing 36 homolog (S. cerevisiae)	748	4	0	1	3	1	hsa-miR-873-3p	0.0293	0.1957	0.9195	-0.19	-0.22	N/A
TAT	ENST00000355962.4	tyrosine aminotransferase	5	1	1	0	0	0	hsa-miR-873-3p	0.0217	0.1469	0.698	-0.19	-0.19	N/A
DIS3L	ENST00000319194.5	DIS3 mitotic control homolog (S. cerevisiae)-like	512	1	0	1	0	0	hsa-miR-873-3p	0.011	0.0786	0.4615	-0.19	-0.19	N/A
MPL	ENST00000372470.3	myeloproliferative leukemia virus oncogene	0	1	0	1	0	0	hsa-miR-873-3p	0.0305	0.197	0.8054	-0.19	-0.19	N/A
MORC4	ENST00000535534.1	MORC family CW-type zinc finger 4	112	1	0	1	0	0	hsa-miR-873-3p	0.0274	0.1722	0.6081	-0.19	-0.19	N/A
AC092850.1	ENST00000598023.1	Protein LOC100996701	5	1	1	0	0	0	hsa-miR-873-3p	0.0065	0.0463	0.2678	-0.19	-0.19	N/A
C20orf96	ENST00000382369.5	chromosome 20 open reading frame 96	257	1	0	1	0	0	hsa-miR-873-3p	0.0165	0.1104	0.4782	-0.19	-0.19	N/A
RBM4B	ENST00000531036.2	RNA binding motif protein 4B	199	2	0	1	1	0	hsa-miR-873-3p	0.0059	0.0423	0.2482	-0.19	-0.32	N/A
CLIC5	ENST00000339561.6	chloride intracellular channel 5	21	1	1	0	0	0	hsa-miR-873-3p	0.0101	0.0708	0.3916	-0.18	-0.18	N/A
NAA20	ENST00000310450.4	N(alpha)-acetyltransferase 20, NatB catalytic subunit	1586	1	0	1	0	0	hsa-miR-873-3p	0.0094	0.0658	0.3424	-0.18	-0.18	N/A
COL1A2	ENST00000297268.6	collagen, type I, alpha 2	877	1	1	0	0	0	hsa-miR-873-3p	0.0065	0.0465	0.2764	-0.18	-0.22	N/A
CSNK1A1	ENST00000261798.5	casein kinase 1, alpha 1	769	1	1	0	0	0	hsa-miR-873-3p	0.0152	0.1003	0.4264	-0.18	-0.3	N/A
RFX5	ENST00000290524.4	regulatory factor X, 5 (influences HLA class II expression)	360	2	1	0	1	0	hsa-miR-873-3p	0.0112	0.0797	0.4633	-0.18	-0.33	N/A
GALNS	ENST00000268695.5	galactosamine (N-acetyl)-6-sulfate sulfatase	155	1	1	0	0	0	hsa-miR-873-3p	0.0067	0.0486	0.308	-0.18	-0.18	N/A
INMT	ENST00000013222.5	indolethylamine N-methyltransferase	5	1	0	1	0	0	hsa-miR-873-3p	0.0172	0.1143	0.4882	-0.18	-0.18	N/A
CYTH3	ENST00000350796.3	cytohesin 3	248	1	1	0	0	0	hsa-miR-873-3p	0.0211	0.1367	0.5359	-0.18	-0.2	N/A
ZNF667	ENST00000591790.1	zinc finger protein 667	24	1	0	1	0	0	hsa-miR-873-3p	0.0113	0.0806	0.4837	-0.18	-0.18	N/A
VSNL1	ENST00000406397.1	visinin-like 1	89	1	0	0	1	0	hsa-miR-873-3p	0.0028	0.0205	0.1392	-0.18	-0.18	N/A
WNT7A	ENST00000285018.4	wingless-type MMTV integration site family, member 7A	5	1	1	0	0	1	hsa-miR-873-3p	0.014	0.0973	0.5125	-0.18	-0.18	N/A
PLA2R1	ENST00000283243.7	phospholipase A2 receptor 1, 180kDa	41	2	0	0	2	0	hsa-miR-873-3p	0.0098	0.0703	0.4426	-0.18	-0.18	N/A
HIST1H2BD	ENST00000289316.2	histone cluster 1, H2bd	236	2	0	1	1	2	hsa-miR-873-3p	0.0042	0.031	0.2121	-0.18	-0.19	N/A
THAP6	ENST00000311638.3	THAP domain containing 6	24	2	0	0	2	0	hsa-miR-873-3p	0.0058	0.042	0.2708	-0.18	-0.23	N/A
SPOCK3	ENST00000357154.3	sparc/osteonectin, cwcv and kazal-like domains proteoglycan (testican) 3	46	1	1	0	0	0	hsa-miR-873-3p	0.005	0.0365	0.2453	-0.18	-0.18	N/A
SAMD9L	ENST00000318238.4	sterile alpha motif domain containing 9-like	5	1	1	0	0	0	hsa-miR-873-3p	0.027	0.1707	0.6192	-0.18	-0.18	N/A
GPR171	ENST00000309180.5	G protein-coupled receptor 171	5	1	0	0	1	0	hsa-miR-873-3p	0.0031	0.0226	0.1457	-0.18	-0.18	N/A
SLC3A1	ENST00000260649.6	solute carrier family 3 (amino acid transporter heavy chain), member 1	5	1	0	0	1	0	hsa-miR-873-3p	0.0034	0.0249	0.1587	-0.18	-0.18	N/A
WDR46	ENST00000374617.4	WD repeat domain 46	267	1	0	1	0	0	hsa-miR-873-3p	0.0131	0.0897	0.4278	-0.18	-0.18	N/A
CNKSR3	ENST00000607772.1	CNKSR family member 3	567	4	1	0	3	5	hsa-miR-873-3p	0.0169	0.1149	0.5381	-0.18	-0.29	N/A
SFRP1	ENST00000220772.3	secreted frizzled-related protein 1	148	1	1	0	0	1	hsa-miR-873-3p	0.0113	0.0799	0.4543	-0.18	-0.2	N/A
GDF7	ENST00000272224.3	growth differentiation factor 7	27	1	0	1	0	1	hsa-miR-873-3p	0.02	0.1303	0.5247	-0.18	-0.2	N/A
DCAF16	ENST00000382247.1	DDB1 and CUL4 associated factor 16	202	1	1	0	0	1	hsa-miR-873-3p	0.0094	0.0665	0.384	-0.18	-0.18	N/A
GRSF1	ENST00000254799.6	G-rich RNA sequence binding factor 1	4414	3	1	1	1	1	hsa-miR-873-3p	0.0178	0.1142	0.4464	-0.18	-0.34	N/A
TRIM71	ENST00000383763.5	tripartite motif containing 71, E3 ubiquitin protein ligase	67	1	1	0	0	0	hsa-miR-873-3p	0.0288	0.1886	0.8154	-0.18	-0.18	N/A
SYAP1	ENST00000380155.3	synapse associated protein 1	2689	3	2	0	1	1	hsa-miR-873-3p	0.0079	0.0568	0.3563	-0.18	-0.28	N/A
SLC35A4	ENST00000323146.3	solute carrier family 35, member A4	334	2	0	2	0	0	hsa-miR-873-3p	0.0292	0.1938	0.8402	-0.18	-0.18	N/A
RABL2B	ENST00000354869.3	RAB, member of RAS oncogene family-like 2B	18	2	0	2	0	1	hsa-miR-873-3p	0.0148	0.1014	0.5018	-0.18	-0.18	N/A
SEC16B	ENST00000308284.6	SEC16 homolog B (S. cerevisiae)	251	1	0	1	0	0	hsa-miR-873-3p	0.0116	0.0821	0.4759	-0.18	-0.18	N/A
HDGF	ENST00000357325.5	hepatoma-derived growth factor	10112	1	0	1	0	0	hsa-miR-873-3p	0.0175	0.1161	0.4924	-0.18	-0.18	N/A
C14orf37	ENST00000267485.7	chromosome 14 open reading frame 37	25	1	0	1	0	0	hsa-miR-873-3p	0.0174	0.1155	0.4907	-0.18	-0.19	N/A
SH3GL3	ENST00000535412.1	SH3-domain GRB2-like 3	74	1	0	0	1	0	hsa-miR-873-3p	0.0042	0.0305	0.1921	-0.18	-0.18	N/A
LHFPL5	ENST00000360215.1	lipoma HMGIC fusion partner-like 5	5	1	0	1	0	0	hsa-miR-873-3p	0.0174	0.1158	0.4942	-0.18	-0.18	N/A
ZNF385D	ENST00000281523.2	zinc finger protein 385D	5	1	1	0	0	0	hsa-miR-873-3p	0.0098	0.0687	0.3736	-0.18	-0.18	N/A
TMEM86A	ENST00000280734.2	transmembrane protein 86A	5	3	0	1	2	0	hsa-miR-873-3p	0.0139	0.0996	0.6024	-0.18	-0.18	N/A
NUDT15	ENST00000258662.2	nudix (nucleoside diphosphate linked moiety X)-type motif 15	16	1	0	1	0	0	hsa-miR-873-3p	0.005	0.0358	0.2153	-0.18	-0.18	N/A
GPATCH2	ENST00000366935.3	G patch domain containing 2	108	1	0	0	1	0	hsa-miR-873-3p	0.0063	0.0458	0.303	-0.18	-0.18	N/A
RNF26	ENST00000311413.4	ring finger protein 26	1208	2	1	0	1	0	hsa-miR-873-3p	0.0082	0.0576	0.3188	-0.18	-0.18	N/A
RP11-676J12.7	ENST00000576252.1	Uncharacterized protein	5	1	0	1	0	0	hsa-miR-873-3p	0.0084	0.0591	0.3172	-0.18	-0.18	N/A
SEMA3C	ENST00000265361.3	sema domain, immunoglobulin domain (Ig), short basic domain, secreted, (semaphorin) 3C	45	1	1	0	0	0	hsa-miR-873-3p	0.018	0.1213	0.5531	-0.18	-0.18	N/A
DUSP13	ENST00000372702.3	dual specificity phosphatase 13	5	1	0	1	0	0	hsa-miR-873-3p	0.009	0.063	0.332	-0.18	-0.18	N/A
LSG1	ENST00000265245.5	large 60S subunit nuclear export GTPase 1	47	4	1	1	2	1	hsa-miR-873-3p	0.0362	0.2376	0.9807	-0.18	-0.23	N/A
CELF3	ENST00000290585.4	CUGBP, Elav-like family member 3	5	2	1	1	0	0	hsa-miR-873-3p	0.0152	0.1025	0.4575	-0.18	-0.21	N/A
ATG12	ENST00000500945.2	autophagy related 12	1822	1	0	0	1	0	hsa-miR-873-3p	0.0028	0.0201	0.1344	-0.17	-0.17	N/A
BEST3	ENST00000488961.1	bestrophin 3	5	2	1	0	1	0	hsa-miR-873-3p	0.0096	0.0686	0.4191	-0.17	-0.17	N/A
POU3F3	ENST00000361360.2	POU class 3 homeobox 3	461	2	0	2	0	0	hsa-miR-873-3p	0.0227	0.1477	0.5757	-0.17	-0.23	N/A
AC140061.12	ENST00000598429.1	Uncharacterized protein	11	2	0	0	2	0	hsa-miR-873-3p	0.0071	0.0511	0.3076	-0.17	-0.17	N/A
PLD6	ENST00000321560.3	phospholipase D family, member 6	280	3	0	1	2	1	hsa-miR-873-3p	0.0208	0.1454	0.7997	-0.17	-0.17	N/A
SLC45A4	ENST00000519067.1	solute carrier family 45, member 4	418	2	0	1	1	0	hsa-miR-873-3p	0.0139	0.0945	0.4428	-0.17	-0.18	N/A
PLEKHS1	ENST00000354462.3	pleckstrin homology domain containing, family S member 1	7	1	1	0	0	0	hsa-miR-873-3p	0.0055	0.0388	0.2125	-0.17	-0.26	N/A
S100A7A	ENST00000368729.4	S100 calcium binding protein A7A	5	2	1	1	0	0	hsa-miR-873-3p	0.0164	0.1169	0.6891	-0.17	-0.17	N/A
PHF5A	ENST00000216252.3	PHD finger protein 5A	317	1	0	0	1	0	hsa-miR-873-3p	0.005	0.0358	0.2267	-0.17	-0.17	N/A
CECR1	ENST00000399839.1	cat eye syndrome chromosome region, candidate 1	46	2	0	2	0	1	hsa-miR-873-3p	0.0237	0.1643	0.8668	-0.17	-0.17	N/A
C10orf25	ENST00000298298.1	chromosome 10 open reading frame 25	29	1	0	0	1	1	hsa-miR-873-3p	0.0114	0.0825	0.5181	-0.17	-0.2	N/A
GOLPH3L	ENST00000271732.3	golgi phosphoprotein 3-like	274	2	0	2	0	2	hsa-miR-873-3p	0.0204	0.1413	0.7289	-0.17	-0.3	N/A
VASH2	ENST00000366968.4	vasohibin 2	70	1	1	0	0	0	hsa-miR-873-3p	0.0122	0.0838	0.4053	-0.17	-0.18	N/A
BMPER	ENST00000297161.2	BMP binding endothelial regulator	723	1	0	1	0	0	hsa-miR-873-3p	0.0179	0.1176	0.4786	-0.17	-0.19	N/A
FRS2	ENST00000550389.1	fibroblast growth factor receptor substrate 2	176	1	1	0	0	1	hsa-miR-873-3p	0.0372	0.2273	0.7729	-0.17	-0.17	N/A
SIRPB1	ENST00000279477.7	signal-regulatory protein beta 1	5	1	0	1	0	0	hsa-miR-873-3p	0.012	0.0832	0.4287	-0.17	-0.17	N/A
RP11-122A3.2	ENST00000517562.2	uncharacterized protein LOC100127983	579	2	0	2	0	0	hsa-miR-873-3p	0.009	0.0635	0.36	-0.17	-0.5	N/A
CDKN1A	ENST00000244741.5	cyclin-dependent kinase inhibitor 1A (p21, Cip1)	1458	1	0	0	1	0	hsa-miR-873-3p	0.0043	0.031	0.1955	-0.17	-0.17	N/A
ADPGK	ENST00000311669.8	ADP-dependent glucokinase	1938	1	0	1	0	0	hsa-miR-873-3p	0.0225	0.1451	0.5564	-0.17	-0.17	N/A
C6ORF50	ENST00000356722.3		5	1	0	0	1	0	hsa-miR-873-3p	0.0037	0.027	0.1798	-0.17	-0.17	N/A
PTGS1	ENST00000362012.2	prostaglandin-endoperoxide synthase 1 (prostaglandin G/H synthase and cyclooxygenase)	399	1	0	0	1	2	hsa-miR-873-3p	0.0037	0.0269	0.1725	-0.17	-0.17	N/A
FKBP1C	ENST00000370659.1	FK506 binding protein 1C	30	1	0	0	1	0	hsa-miR-873-3p	0.0027	0.02	0.1376	-0.17	-0.17	N/A
DMC1	ENST00000216024.2	DNA meiotic recombinase 1	9	1	0	1	0	0	hsa-miR-873-3p	0.0123	0.0849	0.4235	-0.17	-0.17	N/A
APOC4	ENST00000419266.2	apolipoprotein C-IV	2245	1	0	0	1	0	hsa-miR-873-3p	0.0038	0.0274	0.1774	-0.17	-0.17	N/A
CLSTN2	ENST00000458420.3	calsyntenin 2	119	3	0	2	1	2	hsa-miR-873-3p	0.0212	0.151	0.906	-0.17	-0.3	N/A
ETV6	ENST00000396373.4	ets variant 6	44	3	1	2	0	0	hsa-miR-873-3p	0.019	0.1312	0.6779	-0.17	-0.22	N/A
OPCML	ENST00000331898.7	opioid binding protein/cell adhesion molecule-like	5	2	1	1	0	1	hsa-miR-873-3p	0.0198	0.1391	0.7719	-0.17	-0.17	N/A
MCMDC2	ENST00000422365.2	minichromosome maintenance domain containing 2	7	2	1	1	0	0	hsa-miR-873-3p	0.0269	0.1833	0.8805	-0.17	-0.17	N/A
PTPRT	ENST00000373187.1	protein tyrosine phosphatase, receptor type, T	5	2	1	0	1	5	hsa-miR-873-3p	0.03	0.2139	1.2861	-0.17	-0.17	N/A
C9orf78	ENST00000372447.3	chromosome 9 open reading frame 78	1483	1	0	1	0	0	hsa-miR-873-3p	0.0074	0.0528	0.3226	-0.17	-0.17	N/A
MAGEA10	ENST00000370323.4	melanoma antigen family A, 10	5	3	0	2	1	0	hsa-miR-873-3p	0.0197	0.1386	0.772	-0.17	-0.17	N/A
KCNJ14	ENST00000391884.1	potassium inwardly-rectifying channel, subfamily J, member 14	29	2	1	1	0	1	hsa-miR-873-3p	0.0223	0.1524	0.7395	-0.17	-0.17	N/A
ZSCAN5B	ENST00000586855.2	zinc finger and SCAN domain containing 5B	5	1	0	0	1	0	hsa-miR-873-3p	0.0019	0.0136	0.0927	-0.17	-0.17	N/A
AC145676.2	ENST00000514988.1	Uncharacterized protein	5	1	0	0	1	0	hsa-miR-873-3p	0.0032	0.0229	0.1502	-0.17	-0.17	N/A
ENOPH1	ENST00000273920.3	enolase-phosphatase 1	615	1	0	0	1	0	hsa-miR-873-3p	0.0037	0.0267	0.1694	-0.17	-0.17	N/A
PAN3	ENST00000282391.5	PAN3 poly(A) specific ribonuclease subunit homolog (S. cerevisiae)	361	1	0	1	0	0	hsa-miR-873-3p	0.0073	0.0518	0.2862	-0.17	-0.17	N/A
ERLIN1	ENST00000421367.2	ER lipid raft associated 1	86	1	1	0	0	0	hsa-miR-873-3p	0.0091	0.065	0.3802	-0.17	-0.18	N/A
ALKBH1	ENST00000216489.3	alkB, alkylation repair homolog 1 (E. coli)	223	2	0	1	1	0	hsa-miR-873-3p	0.0071	0.0505	0.2864	-0.17	-0.24	N/A
LL22NC03-63E9.3	ENST00000407120.1	Uncharacterized protein	5	1	0	1	0	0	hsa-miR-873-3p	0.0106	0.0736	0.3858	-0.17	-0.17	N/A
SUCO	ENST00000367723.4	SUN domain containing ossification factor	86	1	0	0	1	0	hsa-miR-873-3p	0.0183	0.1325	0.866	-0.17	-0.17	N/A
CNTD2	ENST00000430325.2	cyclin N-terminal domain containing 2	5	1	0	1	0	1	hsa-miR-873-3p	0.019	0.1321	0.6925	-0.17	-0.17	N/A
SURF4	ENST00000545297.1	surfeit 4	3667	1	0	1	0	0	hsa-miR-873-3p	0.0147	0.1007	0.4879	-0.17	-0.18	N/A
CD302	ENST00000259053.4	CD302 molecule	860	2	1	0	1	1	hsa-miR-873-3p	0.0149	0.099	0.436	-0.17	-0.27	N/A
ALPL	ENST00000374840.3	alkaline phosphatase, liver/bone/kidney	251	1	1	0	0	0	hsa-miR-873-3p	0.0097	0.0676	0.3495	-0.17	-0.17	N/A
PCYT1A	ENST00000292823.2	phosphate cytidylyltransferase 1, choline, alpha	731	2	0	1	1	0	hsa-miR-873-3p	0.0124	0.0882	0.5097	-0.17	-0.18	N/A
TMEM50A	ENST00000374358.4	transmembrane protein 50A	228	2	0	1	1	0	hsa-miR-873-3p	0.0064	0.0456	0.2807	-0.17	-0.23	N/A
TEAD1	ENST00000361905.4	TEA domain family member 1 (SV40 transcriptional enhancer factor)	740	4	0	3	1	1	hsa-miR-873-3p	0.0339	0.2394	1.354	-0.17	-0.17	N/A
UEVLD	ENST00000541984.1	UEV and lactate/malate dehyrogenase domains	39	1	0	1	0	0	hsa-miR-873-3p	0.0159	0.1063	0.4632	-0.17	-0.19	N/A
CCDC64	ENST00000397558.2	coiled-coil domain containing 64	7	2	0	2	0	0	hsa-miR-873-3p	0.0301	0.2028	0.9086	-0.17	-0.17	N/A
MAP3K7CL	ENST00000286791.5	MAP3K7 C-terminal like	87	1	1	0	0	0	hsa-miR-873-3p	0.003	0.022	0.1436	-0.17	-0.17	N/A
METTL5	ENST00000410097.1	methyltransferase like 5	5	1	0	1	0	0	hsa-miR-873-3p	0.0067	0.0479	0.276	-0.17	-0.17	N/A
FAM204A	ENST00000369183.4	family with sequence similarity 204, member A	296	2	1	0	1	0	hsa-miR-873-3p	0.0053	0.0379	0.2358	-0.17	-0.39	N/A
TRA2A	ENST00000297071.4	transformer 2 alpha homolog (Drosophila)	1097	1	0	0	1	0	hsa-miR-873-3p	0.004	0.0286	0.1704	-0.17	-0.23	N/A
DTD2	ENST00000310850.4	D-tyrosyl-tRNA deacylase 2 (putative)	924	1	0	1	0	1	hsa-miR-873-3p	0.0061	0.0438	0.2616	-0.17	-0.2	N/A
SNTG1	ENST00000522124.1	syntrophin, gamma 1	5	1	0	1	0	0	hsa-miR-873-3p	0.014	0.0951	0.439	-0.17	-0.17	N/A
TNFRSF12A	ENST00000326577.4	tumor necrosis factor receptor superfamily, member 12A	266	1	0	1	0	0	hsa-miR-873-3p	0.0045	0.0326	0.1995	-0.17	-0.17	N/A
PCBD2	ENST00000512783.1	pterin-4 alpha-carbinolamine dehydratase/dimerization cofactor of hepatocyte nuclear factor 1 alpha (TCF1) 2	95	3	1	2	0	0	hsa-miR-873-3p	0.0291	0.2044	1.1197	-0.17	-0.17	N/A
NUBPL	ENST00000281081.7	nucleotide binding protein-like	7	1	0	1	0	0	hsa-miR-873-3p	0.0179	0.1218	0.5798	-0.17	-0.17	N/A
FOXO6	ENST00000372591.1	forkhead box O6	26	2	0	1	1	0	hsa-miR-873-3p	0.0198	0.136	0.6894	-0.17	-0.17	N/A
EGF	ENST00000265171.5	epidermal growth factor	5	1	1	0	0	0	hsa-miR-873-3p	0.0097	0.0676	0.3609	-0.17	-0.17	N/A
GUCD1	ENST00000447813.2	guanylyl cyclase domain containing 1	2990	1	0	1	0	0	hsa-miR-873-3p	0.0247	0.1622	0.6923	-0.16	-0.17	N/A
C21orf59	ENST00000382549.4	chromosome 21 open reading frame 59	288	1	0	1	0	1	hsa-miR-873-3p	0.0088	0.0623	0.3578	-0.16	-0.16	N/A
SEPT7	ENST00000435235.1	septin 7	97	1	0	1	0	0	hsa-miR-873-3p	0.0074	0.0529	0.305	-0.16	-0.16	N/A
HIST2H3A	ENST00000403683.1	histone cluster 2, H3a	5	1	0	1	0	0	hsa-miR-873-3p	0.0167	0.1112	0.4804	-0.16	-0.16	N/A
HIST2H3C	ENST00000369158.1	histone cluster 2, H3c	5	1	0	1	0	0	hsa-miR-873-3p	0.0167	0.1112	0.4804	-0.16	-0.16	N/A
FAM115A	ENST00000355951.2	family with sequence similarity 115, member A	5	1	0	1	0	2	hsa-miR-873-3p	0.0076	0.0547	0.3302	-0.16	-0.16	N/A
SIT1	ENST00000259608.3	signaling threshold regulating transmembrane adaptor 1	7	1	0	1	0	1	hsa-miR-873-3p	0.0153	0.1043	0.4924	-0.16	-0.19	N/A
KBTBD7	ENST00000379483.3	kelch repeat and BTB (POZ) domain containing 7	362	1	0	1	0	0	hsa-miR-873-3p	0.0109	0.0767	0.4251	-0.16	-0.18	N/A
NOMO2	ENST00000330537.6	NODAL modulator 2	5	1	1	0	0	0	hsa-miR-873-3p	0.0054	0.0387	0.246	-0.16	-0.16	N/A
ZNF549	ENST00000376233.3	zinc finger protein 549	7	1	0	1	0	0	hsa-miR-873-3p	0.0099	0.0697	0.3845	-0.16	-0.16	N/A
TMEM207	ENST00000354905.2	transmembrane protein 207	5	1	0	0	1	0	hsa-miR-873-3p	0.0033	0.0238	0.1528	-0.16	-0.16	N/A
RP11-293M10.1	ENST00000553510.1	Uncharacterized protein	5	1	0	1	0	0	hsa-miR-873-3p	0.0032	0.0228	0.1472	-0.16	-0.16	N/A
ST3GAL3	ENST00000372377.4	ST3 beta-galactoside alpha-2,3-sialyltransferase 3	135	1	1	0	0	0	hsa-miR-873-3p	0.0053	0.0376	0.2242	-0.16	-0.16	N/A
NOMO3	ENST00000399336.4	NODAL modulator 3	5	1	1	0	0	0	hsa-miR-873-3p	0.0054	0.0388	0.2462	-0.16	-0.16	N/A
NTNG1	ENST00000370067.1	netrin G1	5	1	0	1	0	0	hsa-miR-873-3p	0.0133	0.0915	0.4496	-0.16	-0.16	N/A
LY6G5B	ENST00000375864.4	lymphocyte antigen 6 complex, locus G5B	200	1	0	1	0	1	hsa-miR-873-3p	0.0127	0.0875	0.4392	-0.16	-0.16	N/A
CTD-2054N24.2	ENST00000559714.1	Uncharacterized protein	21	2	1	0	1	0	hsa-miR-873-3p	0.015	0.1039	0.5519	-0.16	-0.22	N/A
NR2C2	ENST00000425241.1	nuclear receptor subfamily 2, group C, member 2	227	3	0	2	1	0	hsa-miR-873-3p	0.0168	0.1171	0.6293	-0.16	-0.25	N/A
FGFR1OP	ENST00000366847.4	FGFR1 oncogene partner	552	6	2	1	3	0	hsa-miR-873-3p	0.0211	0.1392	0.5878	-0.16	-0.39	N/A
C15orf43	ENST00000340827.3	chromosome 15 open reading frame 43	23	1	0	0	1	0	hsa-miR-873-3p	0.0033	0.0236	0.1517	-0.16	-0.16	N/A
NOMO1	ENST00000287667.7	NODAL modulator 1	5	1	1	0	0	0	hsa-miR-873-3p	0.0056	0.0405	0.2548	-0.16	-0.16	N/A
TMEM78	ENST00000323223.2	transmembrane protein 78	5	1	0	1	0	0	hsa-miR-873-3p	0.0061	0.0441	0.2769	-0.16	-0.16	N/A
CSTF2T	ENST00000331173.4	cleavage stimulation factor, 3' pre-RNA, subunit 2, 64kDa, tau variant	3550	4	0	3	1	0	hsa-miR-873-3p	0.0043	0.0309	0.2057	-0.16	-0.45	N/A
DPH5	ENST00000370109.3	diphthamide biosynthesis 5	288	2	0	1	1	0	hsa-miR-873-3p	0.0029	0.0209	0.1374	-0.16	-0.26	N/A
VGLL3	ENST00000398399.2	vestigial like 3 (Drosophila)	187	1	1	0	0	2	hsa-miR-873-3p	0.0236	0.1604	0.7818	-0.16	-0.16	N/A
ALDH1A2	ENST00000249750.4	aldehyde dehydrogenase 1 family, member A2	401	1	0	1	0	1	hsa-miR-873-3p	0.0112	0.0798	0.4596	-0.16	-0.16	N/A
RMI2	ENST00000576027.1	RecQ mediated genome instability 2	17	1	0	0	1	0	hsa-miR-873-3p	0.0021	0.0153	0.1028	-0.16	-0.16	N/A
COG4	ENST00000323786.5	component of oligomeric golgi complex 4	2411	1	0	1	0	0	hsa-miR-873-3p	0.0069	0.0486	0.2777	-0.16	-0.16	N/A
CLOCK	ENST00000309964.4	clock circadian regulator	86	1	0	1	0	1	hsa-miR-873-3p	0.0245	0.1752	1.0505	-0.16	-0.16	N/A
RPL22L1	ENST00000295830.8	ribosomal protein L22-like 1	150	1	1	0	0	0	hsa-miR-873-3p	0.0046	0.033	0.1966	-0.16	-0.41	N/A
UBR5	ENST00000520539.1	ubiquitin protein ligase E3 component n-recognin 5	733	1	1	0	0	0	hsa-miR-873-3p	0.009	0.0643	0.3876	-0.16	-0.18	N/A
AKIP1	ENST00000299576.5	A kinase (PRKA) interacting protein 1	727	1	1	0	0	0	hsa-miR-873-3p	0.0041	0.029	0.1554	-0.16	-0.35	N/A
TTC38	ENST00000381031.3	tetratricopeptide repeat domain 38	1352	1	0	1	0	0	hsa-miR-873-3p	0.0133	0.0905	0.4285	-0.16	-0.16	N/A
VRK2	ENST00000412104.2	vaccinia related kinase 2	25	1	0	0	1	0	hsa-miR-873-3p	0.002	0.0145	0.0979	-0.16	-0.16	N/A
ANKRD42	ENST00000393389.3	ankyrin repeat domain 42	224	2	0	1	1	0	hsa-miR-873-3p	0.0045	0.0325	0.2144	-0.16	-0.16	N/A
RRM2	ENST00000360566.2	ribonucleotide reductase M2	3907	1	1	0	0	1	hsa-miR-873-3p	0.0057	0.04	0.2225	-0.16	-0.39	N/A
ROCK2	ENST00000315872.6	Rho-associated, coiled-coil containing protein kinase 2	142	2	0	1	1	0	hsa-miR-873-3p	0.0195	0.1316	0.62	-0.16	-0.19	N/A
ABCC1	ENST00000399408.2	ATP-binding cassette, sub-family C (CFTR/MRP), member 1	441	1	1	0	0	0	hsa-miR-873-3p	0.0149	0.1013	0.4785	-0.16	-0.17	N/A
AGPAT1	ENST00000395496.1	1-acylglycerol-3-phosphate O-acyltransferase 1	181	2	0	2	0	1	hsa-miR-873-3p	0.0162	0.1146	0.6557	-0.16	-0.16	N/A
ITM2C	ENST00000326407.6	integral membrane protein 2C	67220	1	0	1	0	0	hsa-miR-873-3p	0.0106	0.0733	0.369	-0.16	-0.16	N/A
MAPK15	ENST00000338033.4	mitogen-activated protein kinase 15	10	1	0	1	0	0	hsa-miR-873-3p	0.0147	0.0995	0.4496	-0.16	-0.16	N/A
SLC52A3	ENST00000381944.3	solute carrier family 52 (riboflavin transporter), member 3	5	1	1	0	0	0	hsa-miR-873-3p	0.0129	0.0884	0.4223	-0.16	-0.16	N/A
RUNDC3A	ENST00000426726.3	RUN domain containing 3A	11	1	0	1	0	0	hsa-miR-873-3p	0.008	0.0561	0.3074	-0.16	-0.16	N/A
UPF3B	ENST00000276201.2	UPF3 regulator of nonsense transcripts homolog B (yeast)	11	1	0	0	1	0	hsa-miR-873-3p	0.0081	0.0576	0.3415	-0.16	-0.16	N/A
PRPF18	ENST00000378572.3	pre-mRNA processing factor 18	551	1	0	1	0	0	hsa-miR-873-3p	0.0049	0.0349	0.2109	-0.16	-0.16	N/A
ZBTB40	ENST00000404138.1	zinc finger and BTB domain containing 40	124	2	1	0	1	0	hsa-miR-873-3p	0.0205	0.1368	0.6141	-0.16	-0.17	N/A
FAM83F	ENST00000333407.6	family with sequence similarity 83, member F	5	7	0	3	4	3	hsa-miR-873-3p	0.0447	0.3166	1.8237	-0.16	-0.16	N/A
RIMBP3B	ENST00000434111.1	RIMS binding protein 3B	5	1	0	0	1	0	hsa-miR-873-3p	0.0029	0.0214	0.1425	-0.16	-0.16	N/A
RIMBP3	ENST00000426804.1	RIMS binding protein 3	5	1	0	0	1	0	hsa-miR-873-3p	0.0029	0.0212	0.1411	-0.16	-0.16	N/A
FLVCR1	ENST00000366971.4	feline leukemia virus subgroup C cellular receptor 1	322	1	0	0	1	0	hsa-miR-873-3p	0.0075	0.0545	0.3515	-0.16	-0.16	N/A
MAPK13	ENST00000373766.5	mitogen-activated protein kinase 13	499	1	0	1	0	0	hsa-miR-873-3p	0.0137	0.0937	0.4567	-0.16	-0.16	N/A
LEMD2	ENST00000293760.5	LEM domain containing 2	208	2	0	2	0	0	hsa-miR-873-3p	0.0151	0.1068	0.5902	-0.16	-0.16	N/A
C11orf44	ENST00000317019.2	chromosome 11 open reading frame 44	5	2	0	2	0	0	hsa-miR-873-3p	0.0145	0.1027	0.5739	-0.16	-0.16	N/A
AC002472.13	ENST00000543388.1	Leucine-rich repeat-containing protein LOC400891	5	2	0	2	0	0	hsa-miR-873-3p	0.0175	0.1226	0.6619	-0.16	-0.16	N/A
CD36	ENST00000447544.2	CD36 molecule (thrombospondin receptor)	5	1	0	1	0	0	hsa-miR-873-3p	0.021	0.1403	0.6289	-0.16	-0.16	N/A
GNG10	ENST00000374293.4	guanine nucleotide binding protein (G protein), gamma 10	407	1	0	0	1	0	hsa-miR-873-3p	0.002	0.0143	0.0967	-0.16	-0.16	N/A
PSMG3	ENST00000288607.2	proteasome (prosome, macropain) assembly chaperone 3	4378	1	0	0	1	0	hsa-miR-873-3p	0.0027	0.0197	0.1354	-0.16	-0.16	N/A
C13orf35	ENST00000356049.1	chromosome 13 open reading frame 35	5	2	0	1	1	0	hsa-miR-873-3p	0.0056	0.0407	0.2698	-0.16	-0.16	N/A
ZNF623	ENST00000501748.2	zinc finger protein 623	247	3	1	2	0	0	hsa-miR-873-3p	0.0281	0.1998	1.1817	-0.16	-0.18	N/A
FAM219B	ENST00000357635.5	family with sequence similarity 219, member B	270	1	0	1	0	0	hsa-miR-873-3p	0.0061	0.0432	0.2507	-0.15	-0.17	N/A
ALX1	ENST00000316824.3	ALX homeobox 1	37	1	0	1	0	0	hsa-miR-873-3p	0.0101	0.0726	0.4346	-0.15	-0.15	N/A
STMN4	ENST00000519614.1	stathmin-like 4	5	1	0	0	1	0	hsa-miR-873-3p	0.001	0.0075	0.0528	-0.15	-0.15	N/A
MBP	ENST00000397863.1	myelin basic protein	96	2	0	0	2	1	hsa-miR-873-3p	0.011	0.0792	0.4944	-0.15	-0.19	N/A
SP7	ENST00000536324.2	Sp7 transcription factor	5	1	0	1	0	1	hsa-miR-873-3p	0.0151	0.1059	0.591	-0.15	-0.15	N/A
CDKN1B	ENST00000228872.4	cyclin-dependent kinase inhibitor 1B (p27, Kip1)	587	1	0	1	0	0	hsa-miR-873-3p	0.0071	0.05	0.2801	-0.15	-0.15	N/A
AMOT	ENST00000304758.1	angiomotin	515	2	1	1	0	0	hsa-miR-873-3p	0.0226	0.1554	0.7885	-0.15	-0.18	N/A
TMEM241	ENST00000383233.3	transmembrane protein 241	115	1	1	0	0	3	hsa-miR-873-3p	0.0127	0.0909	0.5463	-0.15	-0.17	N/A
TRIM49	ENST00000329758.1	tripartite motif containing 49	5	1	0	0	1	0	hsa-miR-873-3p	0.0057	0.0417	0.2825	-0.15	-0.15	N/A
AC105020.1	ENST00000435356.1	Uncharacterized protein; cDNA FLJ12988 fis, clone NT2RP3000080	5	1	0	1	0	0	hsa-miR-873-3p	0.0143	0.0976	0.4672	-0.15	-0.15	N/A
KRT17	ENST00000311208.8	keratin 17	823	1	0	1	0	0	hsa-miR-873-3p	0.0244	0.1562	0.5776	-0.15	-0.15	N/A
GAB4	ENST00000400588.1	GRB2-associated binding protein family, member 4	5	1	0	1	0	0	hsa-miR-873-3p	0.014	0.0952	0.4395	-0.15	-0.15	N/A
TRIM49C	ENST00000448984.1	tripartite motif containing 49C	5	1	0	0	1	0	hsa-miR-873-3p	0.0056	0.0406	0.2749	-0.15	-0.15	N/A
DERL2	ENST00000572834.1	derlin 2	261	2	0	1	1	2	hsa-miR-873-3p	0.0201	0.1359	0.6638	-0.15	-0.21	N/A
TLR6	ENST00000436693.2	toll-like receptor 6	5	2	0	2	0	0	hsa-miR-873-3p	0.0172	0.1185	0.6014	-0.15	-0.15	N/A
CA10	ENST00000570565.1	carbonic anhydrase X	5	1	0	0	1	0	hsa-miR-873-3p	0.0038	0.0276	0.1732	-0.15	-0.15	N/A
HHAT	ENST00000413764.2	hedgehog acyltransferase	583	2	0	0	2	0	hsa-miR-873-3p	0.0109	0.078	0.4784	-0.15	-0.15	N/A
CHAMP1	ENST00000361283.1	chromosome alignment maintaining phosphoprotein 1	712	1	0	0	1	0	hsa-miR-873-3p	0.0116	0.0843	0.5429	-0.15	-0.16	N/A
ZNF331	ENST00000253144.9	zinc finger protein 331	553	2	0	0	2	0	hsa-miR-873-3p	0.0055	0.0402	0.2714	-0.15	-0.15	N/A
AC005481.5	ENST00000409610.1	Uncharacterized protein	5	1	0	1	0	1	hsa-miR-873-3p	0.0244	0.1566	0.5903	-0.15	-0.15	N/A
FOXG1	ENST00000382535.3	forkhead box G1	40	1	0	1	0	0	hsa-miR-873-3p	0.0076	0.0537	0.2966	-0.15	-0.15	N/A
UBXN2B	ENST00000399598.2	UBX domain protein 2B	157	2	0	0	2	0	hsa-miR-873-3p	0.0115	0.0835	0.5576	-0.15	-0.15	N/A
RP11-192H23.4	ENST00000534850.1	Uncharacterized protein	22	2	0	0	2	0	hsa-miR-873-3p	0.0071	0.0521	0.3521	-0.15	-0.15	N/A
TADA2A	ENST00000394395.2	transcriptional adaptor 2A	278	1	0	1	0	0	hsa-miR-873-3p	0.0139	0.0947	0.4574	-0.15	-0.18	N/A
NAP1L6	ENST00000373518.1	nucleosome assembly protein 1-like 6	5	1	0	0	1	0	hsa-miR-873-3p	0.0032	0.0233	0.1608	-0.15	-0.15	N/A
MSL3	ENST00000312196.4	male-specific lethal 3 homolog (Drosophila)	9	1	0	0	1	0	hsa-miR-873-3p	0.0055	0.0399	0.2555	-0.15	-0.15	N/A
ZFP36L1	ENST00000555997.1	ZFP36 ring finger protein-like 1	231	1	0	1	0	0	hsa-miR-873-3p	0.0149	0.0993	0.4252	-0.15	-0.18	N/A
DTX3	ENST00000551632.1	deltex homolog 3 (Drosophila)	28	1	0	1	0	0	hsa-miR-873-3p	0.0222	0.1441	0.5605	-0.15	-0.15	N/A
TP53AIP1	ENST00000602346.1	tumor protein p53 regulated apoptosis inducing protein 1	5	2	0	1	1	0	hsa-miR-873-3p	0.0093	0.0662	0.3809	-0.15	-0.15	N/A
ERCC4	ENST00000311895.7	excision repair cross-complementing rodent repair deficiency, complementation group 4	261	2	0	2	0	1	hsa-miR-873-3p	0.0416	0.2799	1.3004	-0.15	-0.15	N/A
FLI1	ENST00000527786.2	Fli-1 proto-oncogene, ETS transcription factor	116	1	0	1	0	0	hsa-miR-873-3p	0.0152	0.1028	0.4627	-0.15	-0.15	N/A
GPX1	ENST00000419349.1	glutathione peroxidase 1	122	1	0	1	0	0	hsa-miR-873-3p	0.0079	0.0559	0.3226	-0.15	-0.16	N/A
TM7SF3	ENST00000343028.4	transmembrane 7 superfamily member 3	35	1	0	1	0	1	hsa-miR-873-3p	0.019	0.1269	0.5518	-0.15	-0.15	N/A
CXCR1	ENST00000295683.2	chemokine (C-X-C motif) receptor 1	5	2	0	1	1	0	hsa-miR-873-3p	0.0202	0.1329	0.5455	-0.15	-0.15	N/A
ST3GAL1	ENST00000319914.5	ST3 beta-galactoside alpha-2,3-sialyltransferase 1	59	1	1	0	0	2	hsa-miR-873-3p	0.0085	0.0606	0.3514	-0.15	-0.15	N/A
CD226	ENST00000581982.1	CD226 molecule	8	1	0	0	1	0	hsa-miR-873-3p	0.0026	0.0186	0.1271	-0.15	-0.15	N/A
RPUSD1	ENST00000565809.1	RNA pseudouridylate synthase domain containing 1	1360	1	0	1	0	1	hsa-miR-873-3p	0.008	0.0568	0.339	-0.15	-0.15	N/A
TSEN34	ENST00000302937.4	TSEN34 tRNA splicing endonuclease subunit	2691	2	0	1	1	0	hsa-miR-873-3p	0.002	0.0144	0.0975	-0.15	-0.35	N/A
SLC25A44	ENST00000359511.4	solute carrier family 25, member 44	760	1	1	0	0	1	hsa-miR-873-3p	0.0237	0.1579	0.7145	-0.15	-0.15	N/A
MDM4	ENST00000391947.2	Mdm4 p53 binding protein homolog (mouse)	443	2	1	0	1	2	hsa-miR-873-3p	0.0206	0.1477	0.9235	-0.15	-0.16	N/A
CELF2	ENST00000379261.4	CUGBP, Elav-like family member 2	45	3	0	3	0	3	hsa-miR-873-3p	0.0221	0.1576	0.9641	-0.15	-0.23	N/A
FAM83B	ENST00000306858.7	family with sequence similarity 83, member B	140	2	0	0	2	2	hsa-miR-873-3p	0.0099	0.0722	0.4974	-0.15	-0.15	N/A
GALNT14	ENST00000324589.5	UDP-N-acetyl-alpha-D-galactosamine:polypeptide N-acetylgalactosaminyltransferase 14 (GalNAc-T14)	5	1	0	1	0	0	hsa-miR-873-3p	0.0133	0.0919	0.4694	-0.15	-0.15	N/A
AC093157.1	ENST00000593496.1	Uncharacterized protein	5	1	0	0	1	0	hsa-miR-873-3p	0.0036	0.0263	0.1664	-0.15	-0.15	N/A
RSPH3	ENST00000367069.2	radial spoke 3 homolog (Chlamydomonas)	59	1	1	0	0	0	hsa-miR-873-3p	0.0278	0.1918	1.0116	-0.15	-0.15	N/A
WBP1L	ENST00000369889.4	WW domain binding protein 1-like	5	2	1	0	1	0	hsa-miR-873-3p	0.0065	0.0476	0.3178	-0.15	-0.15	N/A
CACNG3	ENST00000005284.3	calcium channel, voltage-dependent, gamma subunit 3	5	1	0	1	0	0	hsa-miR-873-3p	0.0162	0.1087	0.474	-0.15	-0.15	N/A
PCGF3	ENST00000362003.5	polycomb group ring finger 3	503	1	0	1	0	0	hsa-miR-873-3p	0.0149	0.1019	0.4942	-0.15	-0.15	N/A
KMT2A	ENST00000534358.1	lysine (K)-specific methyltransferase 2A	1092	1	0	1	0	0	hsa-miR-873-3p	0.0217	0.1461	0.6894	-0.15	-0.15	N/A
NDUFAF5	ENST00000378106.5	NADH dehydrogenase (ubiquinone) complex I, assembly factor 5	68	2	0	2	0	2	hsa-miR-873-3p	0.0193	0.1317	0.6315	-0.15	-0.27	N/A
ELMOD3	ENST00000315658.7	ELMO/CED-12 domain containing 3	31	2	1	1	0	0	hsa-miR-873-3p	0.0185	0.13	0.7069	-0.15	-0.15	N/A
SND1	ENST00000354725.3	staphylococcal nuclease and tudor domain containing 1	7201	1	0	1	0	2	hsa-miR-873-3p	0.0132	0.0908	0.4471	-0.15	-0.15	N/A
CCL22	ENST00000219235.4	chemokine (C-C motif) ligand 22	5	2	0	2	0	1	hsa-miR-873-3p	0.0332	0.2251	1.0825	-0.15	-0.15	N/A
GPR17	ENST00000272644.3	G protein-coupled receptor 17	5	2	0	0	2	0	hsa-miR-873-3p	0.0044	0.0318	0.2021	-0.15	-0.15	N/A
TRIT1	ENST00000441669.2	tRNA isopentenyltransferase 1	8	1	0	0	1	0	hsa-miR-873-3p	0.0025	0.0186	0.1261	-0.15	-0.15	N/A
ERC2	ENST00000288221.6	ELKS/RAB6-interacting/CAST family member 2	11	1	1	0	0	1	hsa-miR-873-3p	0.0216	0.1493	0.7525	-0.15	-0.15	N/A
FKBP1A	ENST00000400137.4	FK506 binding protein 1A, 12kDa	72	1	0	0	1	0	hsa-miR-873-3p	0.0026	0.0189	0.1295	-0.15	-0.18	N/A
ATOX1	ENST00000521264.1	antioxidant 1 copper chaperone	43	1	1	0	0	0	hsa-miR-873-3p	0.0116	0.079	0.3755	-0.15	-0.16	N/A
ERMP1	ENST00000381506.3	endoplasmic reticulum metallopeptidase 1	53	2	1	0	1	0	hsa-miR-873-3p	0.0188	0.1269	0.6043	-0.15	-0.24	N/A
MFAP1	ENST00000267812.3	microfibrillar-associated protein 1	882	1	0	0	1	0	hsa-miR-873-3p	0.0006	0.0042	0.0308	-0.15	-0.15	N/A
VAMP7	ENST00000286448.6	vesicle-associated membrane protein 7	5	1	0	1	0	0	hsa-miR-873-3p	0.0071	0.0513	0.3191	-0.15	-0.15	N/A
MXD1	ENST00000264444.2	MAX dimerization protein 1	183	1	1	0	0	0	hsa-miR-873-3p	0.0106	0.0739	0.3777	-0.15	-0.15	N/A
ANO2	ENST00000327087.8	anoctamin 2	10	2	1	0	1	0	hsa-miR-873-3p	0.0092	0.0654	0.3734	-0.15	-0.15	N/A
PPP3CB	ENST00000360663.5	protein phosphatase 3, catalytic subunit, beta isozyme	105	1	0	1	0	0	hsa-miR-873-3p	0.0072	0.0508	0.2835	-0.15	-0.15	N/A
STAG2	ENST00000371160.1	stromal antigen 2	216	1	1	0	0	0	hsa-miR-873-3p	0.0109	0.0756	0.3905	-0.15	-0.15	N/A
HOOK1	ENST00000371208.3	hook microtubule-tethering protein 1	804	1	0	1	0	0	hsa-miR-873-3p	0.0221	0.1448	0.5932	-0.15	-0.15	N/A
RNF213	ENST00000582970.1	ring finger protein 213	630	2	1	1	0	0	hsa-miR-873-3p	0.0164	0.115	0.6332	-0.15	-0.19	N/A
TFPI	ENST00000392365.1	tissue factor pathway inhibitor (lipoprotein-associated coagulation inhibitor)	10747	1	0	1	0	0	hsa-miR-873-3p	0.0249	0.1565	0.557	-0.15	-0.16	N/A
RP11-195F19.5	ENST00000416454.1	HCG2040265, isoform CRA_a; Uncharacterized protein; cDNA FLJ50015	18	1	0	1	0	0	hsa-miR-873-3p	0.0089	0.0623	0.3316	-0.15	-0.15	N/A
SLFN12L	ENST00000260908.7	schlafen family member 12-like	5	2	0	1	1	2	hsa-miR-873-3p	0.008	0.0564	0.3211	-0.15	-0.16	N/A
ST8SIA2	ENST00000268164.3	ST8 alpha-N-acetyl-neuraminide alpha-2,8-sialyltransferase 2	9	1	1	0	0	1	hsa-miR-873-3p	0.0239	0.1606	0.7555	-0.15	-0.15	N/A
CMTR2	ENST00000338099.5	cap methyltransferase 2	259	2	0	0	2	0	hsa-miR-873-3p	0.0053	0.0383	0.2544	-0.14	-0.14	N/A
RANBP3L	ENST00000296604.3	RAN binding protein 3-like	5	1	0	0	1	1	hsa-miR-873-3p	0.0093	0.0648	0.3408	-0.14	-0.14	N/A
NCOA7	ENST00000392477.2	nuclear receptor coactivator 7	2967	2	0	1	1	0	hsa-miR-873-3p	0.0061	0.0445	0.2966	-0.14	-0.21	N/A
FAM177B	ENST00000445590.2	family with sequence similarity 177, member B	5	1	0	0	1	0	hsa-miR-873-3p	0.0032	0.0231	0.1485	-0.14	-0.14	N/A
ABCB9	ENST00000280560.8	ATP-binding cassette, sub-family B (MDR/TAP), member 9	13	1	1	0	0	0	hsa-miR-873-3p	0.0078	0.0547	0.2995	-0.14	-0.14	N/A
TMEM164	ENST00000372073.1	transmembrane protein 164	711	2	0	1	1	1	hsa-miR-873-3p	0.0227	0.1583	0.8543	-0.14	-0.21	N/A
FAM101B	ENST00000329099.4	family with sequence similarity 101, member B	126	3	0	1	2	2	hsa-miR-873-3p	0.0177	0.1218	0.6324	-0.14	-0.17	N/A
NSFL1C	ENST00000353088.2	NSFL1 (p97) cofactor (p47)	397	1	0	1	0	0	hsa-miR-873-3p	0.01	0.0692	0.3498	-0.14	-0.15	N/A
FAF2	ENST00000261942.6	Fas associated factor family member 2	1700	2	0	1	1	0	hsa-miR-873-3p	0.0159	0.1104	0.5839	-0.14	-0.18	N/A
STX1A	ENST00000395156.3	syntaxin 1A (brain)	82	2	1	0	1	0	hsa-miR-873-3p	0.0072	0.0514	0.308	-0.14	-0.14	N/A
TIGD5	ENST00000504548.2	tigger transposable element derived 5	823	1	0	1	0	0	hsa-miR-873-3p	0.014	0.0954	0.4433	-0.14	-0.14	N/A
CDKN1C	ENST00000414822.3	cyclin-dependent kinase inhibitor 1C (p57, Kip2)	328	1	0	1	0	0	hsa-miR-873-3p	0.0061	0.0436	0.2508	-0.14	-0.15	N/A
SGK494	ENST00000301037.5	uncharacterized serine/threonine-protein kinase SgK494	17	2	0	0	2	0	hsa-miR-873-3p	0.0072	0.0521	0.3522	-0.14	-0.14	N/A
RHBDL2	ENST00000372990.1	rhomboid, veinlet-like 2 (Drosophila)	5	2*	0	0	1	0	hsa-miR-873-3p	0.0039	0.0283	0.1926	-0.14	-0.14	N/A
C17orf97	ENST00000360127.6	chromosome 17 open reading frame 97	78	1	0	0	1	0	hsa-miR-873-3p	0.0017	0.0124	0.085	-0.14	-0.15	N/A
TMEM62	ENST00000260403.2	transmembrane protein 62	9	1	0	0	1	0	hsa-miR-873-3p	0.0037	0.027	0.1802	-0.14	-0.14	N/A
HTR3C	ENST00000318351.1	5-hydroxytryptamine (serotonin) receptor 3C, ionotropic	5	1	0	1	0	1	hsa-miR-873-3p	0.0147	0.0997	0.4697	-0.14	-0.14	N/A
CASP10	ENST00000360132.3	caspase 10, apoptosis-related cysteine peptidase	55	2	0	1	1	2	hsa-miR-873-3p	0.0142	0.1015	0.6106	-0.14	-0.14	N/A
RAP2A	ENST00000245304.4	RAP2A, member of RAS oncogene family	721	1	0	1	0	0	hsa-miR-873-3p	0.0186	0.1241	0.5505	-0.14	-0.14	N/A
PRPF38A	ENST00000257181.9	pre-mRNA processing factor 38A	892	1	0	1	0	0	hsa-miR-873-3p	0.0109	0.0759	0.4006	-0.14	-0.2	N/A
CHRM2	ENST00000445907.2	cholinergic receptor, muscarinic 2	5	1	0	1	0	1	hsa-miR-873-3p	0.0242	0.16	0.6933	-0.14	-0.14	N/A
MBD1	ENST00000591416.1	methyl-CpG binding domain protein 1	266	2	0	2	0	0	hsa-miR-873-3p	0.0213	0.1487	0.7991	-0.14	-0.15	N/A
NPLOC4	ENST00000572760.1	nuclear protein localization 4 homolog (S. cerevisiae)	1360	2	0	2	0	0	hsa-miR-873-3p	0.0125	0.0886	0.5069	-0.14	-0.14	N/A
LBR	ENST00000272163.4	lamin B receptor	1217	1	0	0	1	0	hsa-miR-873-3p	0.0063	0.0454	0.2785	-0.14	-0.15	N/A
CDH8	ENST00000584337.1	cadherin 8, type 2	11	1	0	0	1	0	hsa-miR-873-3p	0.0083	0.0599	0.3704	-0.14	-0.14	N/A
FGF16	ENST00000439435.1	fibroblast growth factor 16	5	1	0	0	1	0	hsa-miR-873-3p	0.0032	0.0228	0.1473	-0.14	-0.14	N/A
SLC28A3	ENST00000376238.4	solute carrier family 28 (concentrative nucleoside transporter), member 3	14	1	1	0	0	0	hsa-miR-873-3p	0.0087	0.0619	0.3698	-0.14	-0.14	N/A
CA12	ENST00000178638.3	carbonic anhydrase XII	42	3	1	0	2	0	hsa-miR-873-3p	0.0115	0.0796	0.4152	-0.14	-0.2	N/A
MAL2	ENST00000276681.6	mal, T-cell differentiation protein 2 (gene/pseudogene)	2056	1	0	1	0	0	hsa-miR-873-3p	0.0133	0.0899	0.4044	-0.14	-0.16	N/A
CBL	ENST00000264033.4	Cbl proto-oncogene, E3 ubiquitin protein ligase	309	4	2	2	0	1	hsa-miR-873-3p	0.0439	0.2861	1.2705	-0.14	-0.14	N/A
LHFPL2	ENST00000515007.2	lipoma HMGIC fusion partner-like 2	16	3	0	1	2	0	hsa-miR-873-3p	0.0117	0.0845	0.5225	-0.14	-0.14	N/A
PARVG	ENST00000444313.3	parvin, gamma	5	1	0	1	0	0	hsa-miR-873-3p	0.0154	0.1041	0.4742	-0.14	-0.14	N/A
TRIM48	ENST00000417545.2	tripartite motif containing 48	5	1	0	1	0	0	hsa-miR-873-3p	0.0054	0.039	0.2505	-0.14	-0.14	N/A
ZNF443	ENST00000301547.5	zinc finger protein 443	5	1	0	0	1	0	hsa-miR-873-3p	0.0041	0.0293	0.1823	-0.14	-0.14	N/A
CSNK2B-LY6G5B-1181	ENST00000375880.2	Uncharacterized protein	200	1	0	1	0	1	hsa-miR-873-3p	0.0127	0.0875	0.4392	-0.14	-0.14	N/A
ACLY	ENST00000352035.2	ATP citrate lyase	5900	1	0	1	0	0	hsa-miR-873-3p	0.0097	0.0676	0.3555	-0.14	-0.16	N/A
LOXL4	ENST00000260702.3	lysyl oxidase-like 4	299	1	0	0	1	0	hsa-miR-873-3p	0.0046	0.0334	0.2106	-0.14	-0.14	N/A
CAMK2N2	ENST00000296238.3	calcium/calmodulin-dependent protein kinase II inhibitor 2	39	1	0	1	0	0	hsa-miR-873-3p	0.0098	0.0685	0.367	-0.14	-0.14	N/A
C9orf47	ENST00000375851.2	chromosome 9 open reading frame 47	5	1	0	1	0	4	hsa-miR-873-3p	0.0194	0.1377	0.8132	-0.14	-0.14	N/A
JUP	ENST00000540235.1	junction plakoglobin	823	1	0	1	0	0	hsa-miR-873-3p	0.0244	0.1562	0.5776	-0.14	-0.14	N/A
HS6ST1	ENST00000259241.6	heparan sulfate 6-O-sulfotransferase 1	22	2	0	2	0	0	hsa-miR-873-3p	0.0313	0.2103	0.9277	-0.14	-0.14	N/A
MR1	ENST00000367580.5	major histocompatibility complex, class I-related	107	3	0	1	2	0	hsa-miR-873-3p	0.0067	0.0489	0.3182	-0.14	-0.15	N/A
STK35	ENST00000381482.3	serine/threonine kinase 35	263	1	1	0	0	1	hsa-miR-873-3p	0.0158	0.1113	0.6371	-0.14	-0.14	N/A
ELMO2	ENST00000290246.6	engulfment and cell motility 2	22	1	1	0	0	1	hsa-miR-873-3p	0.0231	0.1528	0.664	-0.14	-0.14	N/A
LAYN	ENST00000525126.1	layilin	175	2	0	0	2	1	hsa-miR-873-3p	0.0023	0.0169	0.1154	-0.14	-0.19	N/A
GPR85	ENST00000297146.3	G protein-coupled receptor 85	21	2	0	1	1	1	hsa-miR-873-3p	0.0072	0.0501	0.2739	-0.14	-0.3	N/A
ACSL5	ENST00000354273.4	acyl-CoA synthetase long-chain family member 5	104	1	0	1	0	0	hsa-miR-873-3p	0.0112	0.0748	0.3296	-0.14	-0.21	N/A
RIT1	ENST00000368323.3	Ras-like without CAAX 1	192	1	0	1	0	0	hsa-miR-873-3p	0.0065	0.0459	0.2552	-0.14	-0.18	N/A
ISOC1	ENST00000173527.5	isochorismatase domain containing 1	390	1	0	0	1	0	hsa-miR-873-3p	0.0033	0.0241	0.1576	-0.14	-0.14	N/A
ZNF561	ENST00000326044.5	zinc finger protein 561	156	1	0	1	0	0	hsa-miR-873-3p	0.0086	0.0604	0.3354	-0.14	-0.14	N/A
RP11-41O4.1	ENST00000584919.1	Uncharacterized protein	14	1	0	0	1	0	hsa-miR-873-3p	0.0034	0.0246	0.1685	-0.14	-0.14	N/A
TMEM55B	ENST00000250489.4	transmembrane protein 55B	623	1	0	1	0	0	hsa-miR-873-3p	0.0193	0.1288	0.562	-0.14	-0.14	N/A
UGCG	ENST00000374279.3	UDP-glucose ceramide glucosyltransferase	1200	1	0	1	0	0	hsa-miR-873-3p	0.0189	0.1259	0.5576	-0.14	-0.14	N/A
FAM203B	ENST00000377406.4	family with sequence similarity 203, member B	5	1	1	0	0	0	hsa-miR-873-3p	0.0081	0.0566	0.3073	-0.14	-0.14	N/A
SIX2	ENST00000303077.6	SIX homeobox 2	75	1	0	1	0	0	hsa-miR-873-3p	0.0048	0.0343	0.2078	-0.14	-0.14	N/A
ARL6IP4	ENST00000392435.2	ADP-ribosylation-like factor 6 interacting protein 4	1797	1	0	1	0	0	hsa-miR-873-3p	0.0045	0.0321	0.1968	-0.14	-0.14	N/A
GAL3ST4	ENST00000423751.1	galactose-3-O-sulfotransferase 4	33	1	0	1	0	0	hsa-miR-873-3p	0.013	0.0905	0.4665	-0.14	-0.14	N/A
RNF20	ENST00000389120.3	ring finger protein 20, E3 ubiquitin protein ligase	772	2	0	1	1	0	hsa-miR-873-3p	0.018	0.1212	0.5671	-0.14	-0.16	N/A
RGS16	ENST00000367558.5	regulator of G-protein signaling 16	7	1	0	1	0	1	hsa-miR-873-3p	0.0111	0.0782	0.4405	-0.14	-0.14	N/A
LYRM9	ENST00000460380.2	LYR motif containing 9	191	1	0	1	0	0	hsa-miR-873-3p	0.0066	0.0467	0.2725	-0.14	-0.15	N/A
AC007375.1	ENST00000600936.1	Uncharacterized protein; cDNA FLJ43210 fis, clone FEBRA2020582	7	2	1	0	1	1	hsa-miR-873-3p	0.0067	0.0486	0.3206	-0.14	-0.14	N/A
PEX10	ENST00000288774.3	peroxisomal biogenesis factor 10	347	1	0	0	1	0	hsa-miR-873-3p	0.0043	0.0308	0.1926	-0.14	-0.14	N/A
HSPA13	ENST00000285667.3	heat shock protein 70kDa family, member 13	2175	1	0	1	0	1	hsa-miR-873-3p	0.0096	0.0679	0.3821	-0.14	-0.15	N/A
SPRED3	ENST00000587013.1	sprouty-related, EVH1 domain containing 3	42	3	1	1	1	2	hsa-miR-873-3p	0.0134	0.0939	0.52	-0.14	-0.31	N/A
DMBX1	ENST00000360032.3	diencephalon/mesencephalon homeobox 1	31	1	1	0	0	1	hsa-miR-873-3p	0.0081	0.0574	0.328	-0.14	-0.16	N/A
RCBTB2	ENST00000344532.3	regulator of chromosome condensation (RCC1) and BTB (POZ) domain containing protein 2	96	1	0	0	1	0	hsa-miR-873-3p	0.0076	0.0546	0.3276	-0.14	-0.14	N/A
MRVI1	ENST00000421747.1	murine retrovirus integration site 1 homolog	26	2	1	1	0	1	hsa-miR-873-3p	0.0268	0.1866	0.9923	-0.14	-0.14	N/A
BTC	ENST00000395743.3	betacellulin	12	1	0	0	1	0	hsa-miR-873-3p	0.0049	0.0356	0.2235	-0.14	-0.14	N/A
ACPL2	ENST00000286353.4	acid phosphatase-like 2	72	1	0	1	0	0	hsa-miR-873-3p	0.0146	0.0989	0.4582	-0.14	-0.14	N/A
TP53INP2	ENST00000374810.3	tumor protein p53 inducible nuclear protein 2	12	1	0	1	0	1	hsa-miR-873-3p	0.032	0.211	0.9433	-0.14	-0.14	N/A
PIGS	ENST00000395346.2	phosphatidylinositol glycan anchor biosynthesis, class S	1015	1	0	1	0	0	hsa-miR-873-3p	0.0112	0.0775	0.3857	-0.14	-0.14	N/A
DUSP28	ENST00000405954.1	dual specificity phosphatase 28	84	2	1	0	1	1	hsa-miR-873-3p	0.0125	0.0877	0.4776	-0.13	-0.16	N/A
ZNF662	ENST00000541208.1	zinc finger protein 662	11	3	0	0	3	0	hsa-miR-873-3p	0.0129	0.0926	0.5599	-0.13	-0.17	N/A
HECTD3	ENST00000372168.3	HECT domain containing E3 ubiquitin protein ligase 3	45	2	1	1	0	1	hsa-miR-873-3p	0.0147	0.1031	0.5551	-0.13	-0.14	N/A
RGPD6	ENST00000329516.3	RANBP2-like and GRIP domain containing 6	5	1	0	1	0	0	hsa-miR-873-3p	0.0224	0.147	0.6049	-0.13	-0.13	N/A
TMLHE	ENST00000334398.3	trimethyllysine hydroxylase, epsilon	5	2*	0	1	0	0	hsa-miR-873-3p	0.0104	0.0731	0.3949	-0.13	-0.13	N/A
DNAJC25-GNG10	ENST00000374294.3	DNAJC25-GNG10 readthrough	407	1	0	0	1	0	hsa-miR-873-3p	0.002	0.0143	0.0967	-0.13	-0.13	N/A
VAX2	ENST00000234392.2	ventral anterior homeobox 2	5	1	0	1	0	0	hsa-miR-873-3p	0.0087	0.0606	0.3227	-0.13	-0.13	N/A
TMEM213	ENST00000442682.2	transmembrane protein 213	5	1	0	0	1	0	hsa-miR-873-3p	0.0046	0.0335	0.2102	-0.13	-0.13	N/A
DNAJC25	ENST00000556107.1	DnaJ (Hsp40) homolog, subfamily C , member 25	407	1	0	0	1	0	hsa-miR-873-3p	0.002	0.0143	0.0967	-0.13	-0.13	N/A
RGPD5	ENST00000016946.3	RANBP2-like and GRIP domain containing 5	5	1	0	1	0	0	hsa-miR-873-3p	0.0224	0.147	0.6049	-0.13	-0.13	N/A
NAIP	ENST00000517649.1	NLR family, apoptosis inhibitory protein	5	1	0	1	0	0	hsa-miR-873-3p	0.012	0.0844	0.4794	-0.13	-0.13	N/A
SEC14L3	ENST00000215812.4	SEC14-like 3 (S. cerevisiae)	5	1	0	1	0	0	hsa-miR-873-3p	0.0113	0.078	0.3845	-0.13	-0.13	N/A
COX7B	ENST00000481445.1	cytochrome c oxidase subunit VIIb	83	3	0	0	3	0	hsa-miR-873-3p	0.0077	0.0565	0.3938	-0.13	-0.14	N/A
NRSN2	ENST00000382291.3	neurensin 2	101	1	0	1	0	0	hsa-miR-873-3p	0.0145	0.0969	0.4232	-0.13	-0.15	N/A
VPS26B	ENST00000281187.5	vacuolar protein sorting 26 homolog B (S. pombe)	1236	2	1	1	0	0	hsa-miR-873-3p	0.0194	0.1343	0.6824	-0.13	-0.14	N/A
SESTD1	ENST00000428443.3	SEC14 and spectrin domains 1	478	3	0	1	2	1	hsa-miR-873-3p	0.0066	0.0474	0.2945	-0.13	-0.21	N/A
C20orf144	ENST00000375222.3	chromosome 20 open reading frame 144	10	1	1	0	0	0	hsa-miR-873-3p	0.0053	0.0372	0.1942	-0.13	-0.28	N/A
SEMA4G	ENST00000210633.3	sema domain, immunoglobulin domain (Ig), transmembrane domain (TM) and short cytoplasmic domain, (semaphorin) 4G	1015	1	0	1	0	1	hsa-miR-873-3p	0.0227	0.1551	0.7765	-0.13	-0.13	N/A
PRSS42	ENST00000447340.1	protease, serine, 42	5	1	0	0	1	1	hsa-miR-873-3p	0.0025	0.0186	0.1299	-0.13	-0.13	N/A
CCRL2	ENST00000399036.3	chemokine (C-C motif) receptor-like 2	5	1	0	0	1	0	hsa-miR-873-3p	0.0045	0.0326	0.2158	-0.13	-0.13	N/A
AC009365.3	ENST00000332558.4		5	1	0	1	0	0	hsa-miR-873-3p	0.0068	0.0482	0.2824	-0.13	-0.13	N/A
GORASP1	ENST00000319283.3	golgi reassembly stacking protein 1, 65kDa	102	1	0	0	1	0	hsa-miR-873-3p	0.006	0.0439	0.2977	-0.13	-0.13	N/A
STRN4	ENST00000263280.6	striatin, calmodulin binding protein 4	1039	1	0	1	0	0	hsa-miR-873-3p	0.0175	0.1191	0.5788	-0.13	-0.13	N/A
MOSPD1	ENST00000370783.3	motile sperm domain containing 1	83	1	0	1	0	1	hsa-miR-873-3p	0.0104	0.0714	0.3506	-0.13	-0.19	N/A
STARD4	ENST00000512160.1	StAR-related lipid transfer (START) domain containing 4	767	1	0	0	1	1	hsa-miR-873-3p	0.0055	0.0402	0.2768	-0.13	-0.18	N/A
ING1	ENST00000333219.7	inhibitor of growth family, member 1	142	3	0	1	2	1	hsa-miR-873-3p	0.0045	0.0318	0.1888	-0.13	-0.28	N/A
LYSMD1	ENST00000368908.5	LysM, putative peptidoglycan-binding, domain containing 1	67	1	0	1	0	1	hsa-miR-873-3p	0.0113	0.0783	0.4074	-0.13	-0.14	N/A
TRIM44	ENST00000299413.5	tripartite motif containing 44	4203	1	1	0	0	1	hsa-miR-873-3p	0.0105	0.0745	0.4385	-0.13	-0.14	N/A
SGCD	ENST00000435422.3	sarcoglycan, delta (35kDa dystrophin-associated glycoprotein)	39	1	1	0	0	1	hsa-miR-873-3p	0.0223	0.1457	0.6165	-0.13	-0.17	N/A
SMARCB1	ENST00000344921.6	SWI/SNF related, matrix associated, actin dependent regulator of chromatin, subfamily b, member 1	1293	1	0	1	0	0	hsa-miR-873-3p	0.0146	0.0988	0.4468	-0.13	-0.13	N/A
EDIL3	ENST00000296591.5	EGF-like repeats and discoidin I-like domains 3	2825	1	0	0	1	1	hsa-miR-873-3p	0.0079	0.0568	0.3512	-0.13	-0.13	N/A
ZNF782	ENST00000481138.1	zinc finger protein 782	8	1	0	0	1	0	hsa-miR-873-3p	0.0039	0.0284	0.1866	-0.13	-0.13	N/A
KLHL15	ENST00000328046.8	kelch-like family member 15	42	1	0	1	0	0	hsa-miR-873-3p	0.0099	0.0697	0.3801	-0.13	-0.13	N/A
GNPDA1	ENST00000311337.6	glucosamine-6-phosphate deaminase 1	1130	1	0	1	0	0	hsa-miR-873-3p	0.0095	0.0661	0.3423	-0.13	-0.13	N/A
ACE2	ENST00000252519.3	angiotensin I converting enzyme 2	5	1	0	1	0	0	hsa-miR-873-3p	0.0058	0.0419	0.2612	-0.13	-0.13	N/A
LEPROT	ENST00000371065.4	leptin receptor overlapping transcript	397	1	0	0	1	1	hsa-miR-873-3p	0.0053	0.0387	0.259	-0.13	-0.13	N/A
PKN2	ENST00000370521.3	protein kinase N2	747	1	0	0	1	0	hsa-miR-873-3p	0.0051	0.0375	0.2513	-0.13	-0.13	N/A
GPN2	ENST00000374135.4	GPN-loop GTPase 2	97	1	0	1	0	1	hsa-miR-873-3p	0.0184	0.1235	0.5669	-0.13	-0.16	N/A
RBBP4	ENST00000373493.5	retinoblastoma binding protein 4	486	4	1	2	1	0	hsa-miR-873-3p	0.0312	0.2154	1.1117	-0.13	-0.15	N/A
OGN	ENST00000262551.4	osteoglycin	5	1	0	0	1	0	hsa-miR-873-3p	0.006	0.043	0.2679	-0.13	-0.13	N/A
GAB2	ENST00000340149.2	GRB2-associated binding protein 2	627	2	1	0	1	0	hsa-miR-873-3p	0.0143	0.1019	0.5983	-0.13	-0.13	N/A
WNT4	ENST00000290167.6	wingless-type MMTV integration site family, member 4	5	1	0	1	0	0	hsa-miR-873-3p	0.0257	0.1666	0.6686	-0.13	-0.13	N/A
ZNF384	ENST00000319770.3	zinc finger protein 384	8	1	0	1	0	0	hsa-miR-873-3p	0.0282	0.1917	0.9394	-0.13	-0.13	N/A
DLX1	ENST00000341900.6	distal-less homeobox 1	312	1	0	1	0	0	hsa-miR-873-3p	0.0126	0.0867	0.4335	-0.13	-0.13	N/A
WDR48	ENST00000302313.5	WD repeat domain 48	638	1	0	1	0	0	hsa-miR-873-3p	0.0124	0.0851	0.4227	-0.13	-0.13	N/A
SYNDIG1L	ENST00000331628.3	synapse differentiation inducing 1-like	7	1	1	0	0	0	hsa-miR-873-3p	0.0037	0.0265	0.1673	-0.13	-0.13	N/A
CASP7	ENST00000369331.4	caspase 7, apoptosis-related cysteine peptidase	277	1	0	0	1	0	hsa-miR-873-3p	0.0029	0.0212	0.148	-0.13	-0.13	N/A
KCTD11	ENST00000333751.3	potassium channel tetramerization domain containing 11	42	1	0	1	0	0	hsa-miR-873-3p	0.0084	0.0595	0.3494	-0.13	-0.13	N/A
DCUN1D4	ENST00000334635.5	DCN1, defective in cullin neddylation 1, domain containing 4	1118	1	0	1	0	0	hsa-miR-873-3p	0.0163	0.108	0.4513	-0.13	-0.14	N/A
SOCS7	ENST00000577233.1	suppressor of cytokine signaling 7	15	1	0	0	1	0	hsa-miR-873-3p	0.0027	0.0199	0.1336	-0.13	-0.13	N/A
EMX1	ENST00000258106.6	empty spiracles homeobox 1	35	1	0	1	0	1	hsa-miR-873-3p	0.0051	0.0369	0.2398	-0.13	-0.14	N/A
POLE3	ENST00000374169.3	polymerase (DNA directed), epsilon 3, accessory subunit	243	1	0	0	1	1	hsa-miR-873-3p	0.0053	0.0388	0.2721	-0.13	-0.13	N/A
CD300LG	ENST00000317310.4	CD300 molecule-like family member g	5	2	0	1	1	0	hsa-miR-873-3p	0.0148	0.1029	0.5358	-0.13	-0.13	N/A
WDR82	ENST00000296490.3	WD repeat domain 82	319	1	0	1	0	0	hsa-miR-873-3p	0.0133	0.0931	0.4978	-0.13	-0.14	N/A
ENC1	ENST00000302351.4	ectodermal-neural cortex 1 (with BTB domain)	57	2	1	0	1	0	hsa-miR-873-3p	0.0153	0.1082	0.6175	-0.13	-0.15	N/A
GPR124	ENST00000315215.7	G protein-coupled receptor 124	72	2	0	0	2	0	hsa-miR-873-3p	0.0081	0.0585	0.3812	-0.13	-0.29	N/A
KLHL20	ENST00000209884.4	kelch-like family member 20	324	1	0	0	1	0	hsa-miR-873-3p	0.0038	0.0275	0.1759	-0.13	-0.13	N/A
PARD6B	ENST00000371610.2	par-6 family cell polarity regulator beta	277	1	1	0	0	3	hsa-miR-873-3p	0.0174	0.1221	0.6858	-0.13	-0.13	N/A
CDK6	ENST00000265734.4	cyclin-dependent kinase 6	1116	3	1	0	2	1	hsa-miR-873-3p	0.0204	0.1455	0.8816	-0.13	-0.14	N/A
NHEJ1	ENST00000356853.5	nonhomologous end-joining factor 1	33	2	0	2	0	2	hsa-miR-873-3p	0.0075	0.0541	0.3385	-0.13	-0.21	N/A
ZNF317	ENST00000247956.6	zinc finger protein 317	433	3	1	1	1	3	hsa-miR-873-3p	0.0316	0.2218	1.2489	-0.13	-0.13	N/A
TACR2	ENST00000373307.1	tachykinin receptor 2	5	2	0	1	1	0	hsa-miR-873-3p	0.0072	0.0511	0.2922	-0.13	-0.17	N/A
PRR20E	ENST00000434815.1	proline rich 20E	5	1	0	0	1	0	hsa-miR-873-3p	0.0019	0.0141	0.0954	-0.13	-0.13	N/A
ZNF674	ENST00000523374.1	zinc finger protein 674	7	1	0	0	1	1	hsa-miR-873-3p	0.0072	0.0521	0.3273	-0.13	-0.13	N/A
PRR20A	ENST00000377931.1	proline rich 20A	5	1	0	0	1	0	hsa-miR-873-3p	0.0019	0.0141	0.0954	-0.13	-0.13	N/A
PRR20D	ENST00000452123.3	proline rich 20D	5	1	0	0	1	0	hsa-miR-873-3p	0.0019	0.0141	0.0954	-0.13	-0.13	N/A
PRR20C	ENST00000544357.2	proline rich 20C	5	1	0	0	1	0	hsa-miR-873-3p	0.0019	0.0141	0.0954	-0.13	-0.13	N/A
EXTL2	ENST00000370113.3	exostosin-like glycosyltransferase 2	204	1	0	0	1	1	hsa-miR-873-3p	0.0087	0.0626	0.3808	-0.13	-0.13	N/A
PRR20B	ENST00000377930.1	proline rich 20B	5	1	0	0	1	0	hsa-miR-873-3p	0.0019	0.0141	0.0954	-0.13	-0.13	N/A
CPNE4	ENST00000512055.1	copine IV	5	1	0	1	0	0	hsa-miR-873-3p	0.0124	0.0859	0.4395	-0.13	-0.13	N/A
SNX31	ENST00000311812.2	sorting nexin 31	5	1	0	0	1	0	hsa-miR-873-3p	0.0029	0.0215	0.1467	-0.13	-0.13	N/A
GPR173	ENST00000332582.4	G protein-coupled receptor 173	99	2	0	2	0	0	hsa-miR-873-3p	0.025	0.1677	0.7551	-0.13	-0.15	N/A
TIPRL	ENST00000367833.2	TIP41, TOR signaling pathway regulator-like (S. cerevisiae)	569	1	0	0	1	0	hsa-miR-873-3p	0.0065	0.0462	0.2614	-0.13	-0.15	N/A
AKT1S1	ENST00000391833.1	AKT1 substrate 1 (proline-rich)	754	1	0	1	0	0	hsa-miR-873-3p	0.0049	0.0351	0.2116	-0.13	-0.13	N/A
CTSO	ENST00000433477.3	cathepsin O	5	3	1	0	2	0	hsa-miR-873-3p	0.0034	0.0248	0.1643	-0.13	-0.26	N/A
ZC3H13	ENST00000242848.4	zinc finger CCCH-type containing 13	229	2	1	0	1	0	hsa-miR-873-3p	0.0088	0.0621	0.3589	-0.13	-0.36	N/A
PARP14	ENST00000474629.2	poly (ADP-ribose) polymerase family, member 14	502	1	0	1	0	0	hsa-miR-873-3p	0.0228	0.1591	0.8657	-0.13	-0.13	N/A
MCFD2	ENST00000444761.2	multiple coagulation factor deficiency 2	1648	2	0	1	1	0	hsa-miR-873-3p	0.0079	0.0572	0.3684	-0.13	-0.15	N/A
TSPAN33	ENST00000289407.4	tetraspanin 33	237	1	1	0	0	1	hsa-miR-873-3p	0.0101	0.0701	0.3676	-0.13	-0.13	N/A
TSPAN7	ENST00000378482.2	tetraspanin 7	2536	1	0	1	0	0	hsa-miR-873-3p	0.0095	0.0667	0.3543	-0.13	-0.13	N/A
UPF3A	ENST00000375299.3	UPF3 regulator of nonsense transcripts homolog A (yeast)	44	1	0	1	0	0	hsa-miR-873-3p	0.0098	0.0684	0.3518	-0.13	-0.13	N/A
LRRC29	ENST00000409509.1	leucine rich repeat containing 29	5	1	0	1	0	0	hsa-miR-873-3p	0.0072	0.0509	0.284	-0.13	-0.13	N/A
SLC2A3	ENST00000075120.7	solute carrier family 2 (facilitated glucose transporter), member 3	5	2	0	1	1	0	hsa-miR-873-3p	0.0272	0.1779	0.7451	-0.13	-0.13	N/A
AMER3	ENST00000423981.1	APC membrane recruitment protein 3	5	1	0	1	0	0	hsa-miR-873-3p	0.0217	0.147	0.7089	-0.13	-0.13	N/A
DGCR6L	ENST00000248879.3	DiGeorge syndrome critical region gene 6-like	18	1	0	0	1	0	hsa-miR-873-3p	0.0051	0.0369	0.2403	-0.13	-0.13	N/A
ZNF256	ENST00000598928.1	zinc finger protein 256	18	1	1	0	0	0	hsa-miR-873-3p	0.0056	0.0386	0.1887	-0.13	-0.4	N/A
ABHD10	ENST00000494817.1	abhydrolase domain containing 10	929	1	0	1	0	0	hsa-miR-873-3p	0.0086	0.0597	0.3045	-0.13	-0.15	N/A
MAFF	ENST00000338483.2	v-maf avian musculoaponeurotic fibrosarcoma oncogene homolog F	160	1	1	0	0	0	hsa-miR-873-3p	0.0099	0.07	0.4049	-0.13	-0.13	N/A
CNR1	ENST00000362094.5	cannabinoid receptor 1 (brain)	40	1	0	0	1	0	hsa-miR-873-3p	0.0044	0.0323	0.2221	-0.13	-0.14	N/A
KCNG4	ENST00000308251.4	potassium voltage-gated channel, subfamily G, member 4	0	1	0	1	0	0	hsa-miR-873-3p	0.0162	0.1085	0.4734	-0.13	-0.13	N/A
IL2RB	ENST00000216223.5	interleukin 2 receptor, beta	5	1	1	0	0	0	hsa-miR-873-3p	0.0146	0.1012	0.5164	-0.13	-0.13	N/A
CHL1	ENST00000256509.2	cell adhesion molecule L1-like	24	3	0	1	2	0	hsa-miR-873-3p	0.0181	0.128	0.7288	-0.13	-0.13	N/A
AC022498.1	ENST00000392468.2	Uncharacterized protein	5	1	0	1	0	0	hsa-miR-873-3p	0.004	0.0286	0.1786	-0.13	-0.13	N/A
SLC25A53	ENST00000357421.4	solute carrier family 25, member 53	15	1	0	1	0	1	hsa-miR-873-3p	0.014	0.0987	0.5601	-0.13	-0.13	N/A
VSTM2A	ENST00000407838.3	V-set and transmembrane domain containing 2A	5	1	0	1	0	1	hsa-miR-873-3p	0.0139	0.095	0.461	-0.13	-0.13	N/A
KCNE3	ENST00000310128.4	potassium voltage-gated channel, Isk-related family, member 3	16	1	0	1	0	1	hsa-miR-873-3p	0.0192	0.1324	0.6772	-0.13	-0.13	N/A
BTNL9	ENST00000327705.9	butyrophilin-like 9	8	1	1	0	0	0	hsa-miR-873-3p	0.0094	0.0675	0.4268	-0.13	-0.13	N/A
SF3A3	ENST00000373019.4	splicing factor 3a, subunit 3, 60kDa	59	1	0	0	1	0	hsa-miR-873-3p	0.0025	0.0184	0.1241	-0.13	-0.13	N/A
PHACTR4	ENST00000373839.3	phosphatase and actin regulator 4	85	1	1	0	0	2	hsa-miR-873-3p	0.0178	0.1273	0.7716	-0.13	-0.14	N/A
MLF1	ENST00000355893.5	myeloid leukemia factor 1	458	1	0	0	1	0	hsa-miR-873-3p	0.0045	0.0327	0.2174	-0.13	-0.15	N/A
PIAS2	ENST00000585916.1	protein inhibitor of activated STAT, 2	194	1	1	0	0	0	hsa-miR-873-3p	0.0139	0.0937	0.4383	-0.13	-0.18	N/A
LNX2	ENST00000316334.3	ligand of numb-protein X 2	760	1	1	0	0	0	hsa-miR-873-3p	0.0161	0.109	0.5049	-0.12	-0.12	N/A
NR3C2	ENST00000344721.4	nuclear receptor subfamily 3, group C, member 2	425	1	0	1	0	0	hsa-miR-873-3p	0.0217	0.1483	0.7431	-0.12	-0.12	N/A
AGT	ENST00000366667.4	angiotensinogen (serpin peptidase inhibitor, clade A, member 8)	10905	1	0	1	0	0	hsa-miR-873-3p	0.0094	0.0655	0.3456	-0.12	-0.12	N/A
AC137932.1	ENST00000602042.1		5	1	0	1	0	0	hsa-miR-873-3p	0.0144	0.099	0.4963	-0.12	-0.12	N/A
NEUROD2	ENST00000302584.4	neuronal differentiation 2	5	1	0	1	0	0	hsa-miR-873-3p	0.0193	0.1273	0.5253	-0.12	-0.12	N/A
EGLN3	ENST00000250457.3	egl-9 family hypoxia-inducible factor 3	71	1	0	1	0	0	hsa-miR-873-3p	0.0116	0.0746	0.2891	-0.12	-0.28	N/A
C21orf33	ENST00000291577.6	chromosome 21 open reading frame 33	1153	1	0	0	1	0	hsa-miR-873-3p	0.0054	0.0385	0.2284	-0.12	-0.12	N/A
TMEM159	ENST00000572258.1	transmembrane protein 159	159	2	0	1	1	1	hsa-miR-873-3p	0.0053	0.0385	0.2601	-0.12	-0.13	N/A
CR769776.1	ENST00000414341.2	LOC441426 protein; Uncharacterized protein	5	1	0	0	1	0	hsa-miR-873-3p	0.0049	0.0353	0.2203	-0.12	-0.12	N/A
CCDC96	ENST00000310085.4	coiled-coil domain containing 96	62	1	0	0	1	0	hsa-miR-873-3p	0.0016	0.0119	0.0792	-0.12	-0.18	N/A
BARX1	ENST00000253968.6	BARX homeobox 1	10	1	0	1	0	0	hsa-miR-873-3p	0.0062	0.0439	0.256	-0.12	-0.12	N/A
P2RY1	ENST00000305097.3	purinergic receptor P2Y, G-protein coupled, 1	58	2*	0	1	0	0	hsa-miR-873-3p	0.0155	0.1089	0.6	-0.12	-0.12	N/A
KLHDC8A	ENST00000367155.3	kelch domain containing 8A	8	2	0	1	1	0	hsa-miR-873-3p	0.0117	0.0834	0.4828	-0.12	-0.12	N/A
CD72	ENST00000396757.1	CD72 molecule	7	1	0	0	1	0	hsa-miR-873-3p	0.0018	0.0134	0.0912	-0.12	-0.16	N/A
UNC119B	ENST00000344651.4	unc-119 homolog B (C. elegans)	5	3	0	1	2	0	hsa-miR-873-3p	0.0155	0.1093	0.6289	-0.12	-0.12	N/A
CYB5R1	ENST00000367249.4	cytochrome b5 reductase 1	545	1	0	1	0	0	hsa-miR-873-3p	0.0098	0.0689	0.3885	-0.12	-0.12	N/A
C5orf22	ENST00000325366.9	chromosome 5 open reading frame 22	598	1	0	0	1	0	hsa-miR-873-3p	0.0045	0.0326	0.2251	-0.12	-0.13	N/A
AC012215.1	ENST00000437887.1	Uncharacterized protein	31	2	0	0	2	0	hsa-miR-873-3p	0.0023	0.017	0.1185	-0.12	-0.14	N/A
GJA9	ENST00000454994.2	gap junction protein, alpha 9, 59kDa	85	2	0	1	1	1	hsa-miR-873-3p	0.0084	0.0589	0.3245	-0.12	-0.17	N/A
ZNF3	ENST00000424697.1	zinc finger protein 3	671	1	0	0	1	0	hsa-miR-873-3p	0.0016	0.0116	0.0813	-0.12	-0.12	N/A
TFR2	ENST00000431692.1	transferrin receptor 2	330	1	0	0	1	1	hsa-miR-873-3p	0.0072	0.0519	0.3289	-0.12	-0.12	N/A
MARCH8	ENST00000453424.2	membrane-associated ring finger (C3HC4) 8, E3 ubiquitin protein ligase	48	1	0	0	1	2	hsa-miR-873-3p	0.0159	0.115	0.7305	-0.12	-0.12	N/A
KLHL2	ENST00000538127.1	kelch-like family member 2	511	1	0	0	1	0	hsa-miR-873-3p	0.0029	0.0208	0.1355	-0.12	-0.12	N/A
RP11-332O19.5	ENST00000441178.2	rcRPE protein	5	1	0	0	1	0	hsa-miR-873-3p	0.0035	0.0256	0.1706	-0.12	-0.12	N/A
FAM203A	ENST00000347708.4	family with sequence similarity 203, member A	5	1	1	0	0	0	hsa-miR-873-3p	0.0081	0.0566	0.3073	-0.12	-0.12	N/A
B3GNT7	ENST00000287590.5	UDP-GlcNAc:betaGal beta-1,3-N-acetylglucosaminyltransferase 7	5	1	0	1	0	1	hsa-miR-873-3p	0.0191	0.13	0.6276	-0.12	-0.12	N/A
CNTN1	ENST00000551295.2	contactin 1	40	1	0	1	0	0	hsa-miR-873-3p	0.0114	0.0806	0.4612	-0.12	-0.13	N/A
CDC42BPB	ENST00000361246.2	CDC42 binding protein kinase beta (DMPK-like)	615	1	0	0	1	0	hsa-miR-873-3p	0.0027	0.0198	0.1381	-0.12	-0.12	N/A
ARL5C	ENST00000269586.7	ADP-ribosylation factor-like 5C	2	1	0	1	0	2	hsa-miR-873-3p	0.0142	0.0986	0.5158	-0.12	-0.12	N/A
MFNG	ENST00000416983.3	MFNG O-fucosylpeptide 3-beta-N-acetylglucosaminyltransferase	14	1	0	1	0	1	hsa-miR-873-3p	0.0147	0.0999	0.4729	-0.12	-0.18	N/A
ZNF665	ENST00000600412.1	zinc finger protein 665	37	1	0	1	0	0	hsa-miR-873-3p	0.0159	0.1093	0.5436	-0.12	-0.14	N/A
NIPAL3	ENST00000003912.3	NIPA-like domain containing 3	775	2	0	0	2	0	hsa-miR-873-3p	0.004	0.0293	0.1976	-0.12	-0.13	N/A
PSD4	ENST00000441564.3	pleckstrin and Sec7 domain containing 4	72	2	2	0	0	4	hsa-miR-873-3p	0.0173	0.1167	0.5379	-0.12	-0.15	N/A
PDP1	ENST00000396200.3	pyruvate dehyrogenase phosphatase catalytic subunit 1	285	1	0	1	0	1	hsa-miR-873-3p	0.0162	0.1132	0.6135	-0.12	-0.12	N/A
RUNX3	ENST00000399916.1	runt-related transcription factor 3	378	2	0	1	1	0	hsa-miR-873-3p	0.0216	0.1482	0.7458	-0.12	-0.12	N/A
SFMBT2	ENST00000361972.4	Scm-like with four mbt domains 2	107	1	1	0	0	1	hsa-miR-873-3p	0.0218	0.1512	0.8039	-0.12	-0.12	N/A
UTF1	ENST00000304477.2	undifferentiated embryonic cell transcription factor 1	5	1	0	1	0	0	hsa-miR-873-3p	0.0047	0.0339	0.2061	-0.12	-0.12	N/A
TMPRSS15	ENST00000284885.3	transmembrane protease, serine 15	5	1	0	0	1	0	hsa-miR-873-3p	0.0025	0.0183	0.1252	-0.12	-0.12	N/A
FAM198B	ENST00000585682.1	family with sequence similarity 198, member B	25	2	0	1	1	1	hsa-miR-873-3p	0.0113	0.0819	0.5194	-0.12	-0.12	N/A
AC008132.1	ENST00000342888.3	Uncharacterized protein	5	1	0	1	0	0	hsa-miR-873-3p	0.0116	0.0808	0.4192	-0.12	-0.12	N/A
TMC5	ENST00000381414.4	transmembrane channel-like 5	6	1	0	1	0	0	hsa-miR-873-3p	0.0114	0.08	0.4346	-0.12	-0.14	N/A
SKA1	ENST00000285116.3	spindle and kinetochore associated complex subunit 1	86	2	0	2	0	0	hsa-miR-873-3p	0.0103	0.0736	0.4399	-0.12	-0.15	N/A
ZNF132	ENST00000254166.3	zinc finger protein 132	31	3	0	2	1	0	hsa-miR-873-3p	0.0242	0.1638	0.7931	-0.12	-0.19	N/A
TEX9	ENST00000558083.2	testis expressed 9	10	2	0	0	2	0	hsa-miR-873-3p	0.012	0.0865	0.5418	-0.12	-0.26	N/A
AP003774.4	ENST00000316124.2	HCG1652096, isoform CRA_a; Uncharacterized protein; cDNA FLJ37045 fis, clone BRACE2012185	5	1	0	0	1	0	hsa-miR-873-3p	0.004	0.0293	0.1965	-0.12	-0.12	N/A
ZNF75A	ENST00000574298.1	zinc finger protein 75a	145	1	0	0	1	1	hsa-miR-873-3p	0.0069	0.0494	0.297	-0.12	-0.12	N/A
KLK13	ENST00000595793.1	kallikrein-related peptidase 13	9	2	0	2	0	1	hsa-miR-873-3p	0.012	0.0811	0.3835	-0.12	-0.3	N/A
EGR3	ENST00000519492.1	early growth response 3	21	1	1	0	0	0	hsa-miR-873-3p	0.0074	0.0513	0.2646	-0.12	-0.16	N/A
ZSCAN12	ENST00000361028.1	zinc finger and SCAN domain containing 12	117	3	0	2	1	0	hsa-miR-873-3p	0.0302	0.2088	1.0754	-0.12	-0.12	N/A
PMP2	ENST00000256103.2	peripheral myelin protein 2	5	1	0	0	1	0	hsa-miR-873-3p	0.0043	0.031	0.2001	-0.12	-0.12	N/A
MCM2	ENST00000265056.7	minichromosome maintenance complex component 2	843	1	0	1	0	0	hsa-miR-873-3p	0.0122	0.0838	0.4049	-0.12	-0.12	N/A
ENTHD2	ENST00000300714.3	ENTH domain containing 2	126	2	0	1	1	0	hsa-miR-873-3p	0.0106	0.0755	0.4441	-0.12	-0.12	N/A
OR7D2	ENST00000344248.2	olfactory receptor, family 7, subfamily D, member 2	5	3	0	1	2	1	hsa-miR-873-3p	0.0165	0.1159	0.6449	-0.12	-0.12	N/A
C9orf96	ENST00000371957.3	chromosome 9 open reading frame 96	5	1	0	1	0	0	hsa-miR-873-3p	0.0043	0.0312	0.1921	-0.12	-0.12	N/A
AL139099.1	ENST00000539688.1	Full-length cDNA clone CS0DK012YO09 of HeLa cells of Homo sapiens (human); Uncharacterized protein	9	1	0	1	0	0	hsa-miR-873-3p	0.0047	0.0333	0.1901	-0.12	-0.22	N/A
GNA13	ENST00000439174.2	guanine nucleotide binding protein (G protein), alpha 13	190	1	0	1	0	1	hsa-miR-873-3p	0.0087	0.062	0.3721	-0.12	-0.14	N/A
BTBD19	ENST00000453418.1	BTB (POZ) domain containing 19	61	1	0	1	0	1	hsa-miR-873-3p	0.0138	0.095	0.4749	-0.12	-0.13	N/A
CLMP	ENST00000448775.2	CXADR-like membrane protein	212	1	0	1	0	2	hsa-miR-873-3p	0.0281	0.1901	0.918	-0.12	-0.12	N/A
PLD1	ENST00000342215.6	phospholipase D1, phosphatidylcholine-specific	128	2	0	0	2	0	hsa-miR-873-3p	0.0044	0.0316	0.2093	-0.12	-0.22	N/A
SEZ6L2	ENST00000346932.5	seizure related 6 homolog (mouse)-like 2	223	1	0	1	0	1	hsa-miR-873-3p	0.0127	0.0878	0.4466	-0.12	-0.23	N/A
LGSN	ENST00000370658.5	lengsin, lens protein with glutamine synthetase domain	21	1	0	0	1	3	hsa-miR-873-3p	0.0092	0.0669	0.4489	-0.12	-0.12	N/A
C5AR1	ENST00000355085.3	complement component 5a receptor 1	5	1	0	0	1	0	hsa-miR-873-3p	0.0036	0.0264	0.1753	-0.12	-0.12	N/A
CHEK2	ENST00000382566.1	checkpoint kinase 2	5	1	0	0	1	0	hsa-miR-873-3p	0.0032	0.0232	0.1594	-0.12	-0.12	N/A
TCERG1L	ENST00000368642.4	transcription elongation regulator 1-like	5	1	0	1	0	0	hsa-miR-873-3p	0.0107	0.0744	0.3782	-0.12	-0.12	N/A
SLC34A1	ENST00000324417.5	solute carrier family 34 (type II sodium/phosphate contransporter), member 1	5	1	0	1	0	0	hsa-miR-873-3p	0.0097	0.0696	0.4204	-0.12	-0.12	N/A
ITIH6	ENST00000218436.6	inter-alpha-trypsin inhibitor heavy chain family, member 6	5	1	1	0	0	0	hsa-miR-873-3p	0.0114	0.0791	0.3959	-0.12	-0.12	N/A
GLTPD2	ENST00000331264.7	glycolipid transfer protein domain containing 2	527	1	0	1	0	0	hsa-miR-873-3p	0.0029	0.0213	0.1387	-0.12	-0.12	N/A
SPATA13	ENST00000382108.3	spermatogenesis associated 13	900	2	0	1	1	0	hsa-miR-873-3p	0.0104	0.0751	0.4676	-0.12	-0.12	N/A
ARSD	ENST00000381154.1	arylsulfatase D	70	2	0	1	1	1	hsa-miR-873-3p	0.0138	0.0977	0.5551	-0.12	-0.12	N/A
GYS1	ENST00000323798.3	glycogen synthase 1 (muscle)	100	1	1	0	0	0	hsa-miR-873-3p	0.0115	0.0795	0.3909	-0.12	-0.12	N/A
FBXO46	ENST00000317683.3	F-box protein 46	197	1	0	1	0	0	hsa-miR-873-3p	0.0093	0.0648	0.3386	-0.12	-0.12	N/A
DOCK2	ENST00000256935.8	dedicator of cytokinesis 2	5	1	0	0	1	0	hsa-miR-873-3p	0.0029	0.0208	0.1393	-0.12	-0.12	N/A
SARDH	ENST00000371872.4	sarcosine dehydrogenase	355	1	0	1	0	0	hsa-miR-873-3p	0.0027	0.0193	0.1267	-0.12	-0.12	N/A
VPS39	ENST00000318006.5	vacuolar protein sorting 39 homolog (S. cerevisiae)	165	2	0	1	1	0	hsa-miR-873-3p	0.0175	0.1185	0.5551	-0.12	-0.13	N/A
RALGAPA1	ENST00000389698.3	Ral GTPase activating protein, alpha subunit 1 (catalytic)	82	1	0	0	1	0	hsa-miR-873-3p	0.0141	0.1017	0.6332	-0.12	-0.12	N/A
TNKS1BP1	ENST00000358252.3	tankyrase 1 binding protein 1, 182kDa	3238	1	1	0	0	0	hsa-miR-873-3p	0.0042	0.0307	0.1997	-0.12	-0.12	N/A
AK9	ENST00000285397.5	adenylate kinase 9	124	1	0	1	0	0	hsa-miR-873-3p	0.018	0.1192	0.5	-0.12	-0.12	N/A
RHOT2	ENST00000315082.4	ras homolog family member T2	1368	1	0	1	0	0	hsa-miR-873-3p	0.0066	0.046	0.2396	-0.12	-0.17	N/A
ZNF83	ENST00000594682.2	zinc finger protein 83	78	2	0	0	2	0	hsa-miR-873-3p	0.0036	0.0264	0.177	-0.12	-0.14	N/A
NT5C2	ENST00000343289.5	5'-nucleotidase, cytosolic II	468	1	0	0	1	1	hsa-miR-873-3p	0.0058	0.0422	0.2766	-0.12	-0.12	N/A
ZNF202	ENST00000336139.4	zinc finger protein 202	704	1	0	1	0	1	hsa-miR-873-3p	0.0118	0.083	0.4613	-0.12	-0.12	N/A
MAN1A2	ENST00000356554.3	mannosidase, alpha, class 1A, member 2	603	2	0	1	1	0	hsa-miR-873-3p	0.0112	0.08	0.4755	-0.12	-0.16	N/A
C20orf27	ENST00000217195.8	chromosome 20 open reading frame 27	2687	1	0	1	0	0	hsa-miR-873-3p	0.0165	0.1102	0.478	-0.12	-0.12	N/A
XIRP2	ENST00000409195.1	xin actin-binding repeat containing 2	5	1	1	0	0	0	hsa-miR-873-3p	0.0127	0.0905	0.5332	-0.12	-0.12	N/A
TEX14	ENST00000389934.3	testis expressed 14	7	1	0	0	1	0	hsa-miR-873-3p	0.0035	0.0255	0.1753	-0.12	-0.12	N/A
RUNDC3B	ENST00000338056.3	RUN domain containing 3B	41	2	0	0	2	0	hsa-miR-873-3p	0.007	0.0509	0.3397	-0.12	-0.12	N/A
DST	ENST00000312431.6	dystonin	439	3	1	1	1	2	hsa-miR-873-3p	0.034	0.2413	1.4247	-0.12	-0.12	N/A
FOXJ2	ENST00000162391.3	forkhead box J2	9	1	0	0	1	1	hsa-miR-873-3p	0.017	0.1209	0.7017	-0.12	-0.12	N/A
LAMC1	ENST00000258341.4	laminin, gamma 1 (formerly LAMB2)	1082	2	1	0	1	1	hsa-miR-873-3p	0.0207	0.1394	0.6582	-0.12	-0.15	N/A
IFLTD1	ENST00000445693.1	intermediate filament tail domain containing 1	5	2	0	0	2	2	hsa-miR-873-3p	0.0017	0.0127	0.0897	-0.12	-0.19	N/A
SRGAP2	ENST00000414007.1	SLIT-ROBO Rho GTPase activating protein 2	98	3	0	2	1	1	hsa-miR-873-3p	0.0324	0.2262	1.2432	-0.12	-0.13	N/A
ZBTB41	ENST00000367405.4	zinc finger and BTB domain containing 41	33	2	1	0	1	0	hsa-miR-873-3p	0.0093	0.0654	0.3728	-0.12	-0.26	N/A
SNRPB	ENST00000381342.2	small nuclear ribonucleoprotein polypeptides B and B1	234	1	0	0	1	0	hsa-miR-873-3p	0.0009	0.0065	0.0467	-0.12	-0.12	N/A
NCCRP1	ENST00000339852.4	non-specific cytotoxic cell receptor protein 1 homolog (zebrafish)	5	1	0	0	1	0	hsa-miR-873-3p	0.0035	0.0253	0.1664	-0.12	-0.12	N/A
TMCO4	ENST00000294543.6	transmembrane and coiled-coil domains 4	13	1	0	1	0	0	hsa-miR-873-3p	0.0095	0.066	0.3453	-0.12	-0.12	N/A
AC004899.1	ENST00000596947.1	Uncharacterized protein	5	1	0	1	0	0	hsa-miR-873-3p	0.0127	0.0878	0.4503	-0.12	-0.12	N/A
C5orf42	ENST00000508244.1	chromosome 5 open reading frame 42	45	1	1	0	0	0	hsa-miR-873-3p	0.0125	0.0869	0.4675	-0.11	-0.21	N/A
TXN2	ENST00000216185.2	thioredoxin 2	3060	1	0	0	1	0	hsa-miR-873-3p	0.0009	0.0064	0.0452	-0.11	-0.12	N/A
ERAP1	ENST00000443439.2	endoplasmic reticulum aminopeptidase 1	133	1	0	1	0	0	hsa-miR-873-3p	0.0203	0.1362	0.6138	-0.11	-0.11	N/A
RS1	ENST00000379984.3	retinoschisin 1	5	1	1	0	0	0	hsa-miR-873-3p	0.0094	0.066	0.3685	-0.11	-0.11	N/A
SEC14L5	ENST00000251170.7	SEC14-like 5 (S. cerevisiae)	5	2	0	0	2	2	hsa-miR-873-3p	0.0122	0.0887	0.6019	-0.11	-0.11	N/A
AP3B2	ENST00000542200.1	adaptor-related protein complex 3, beta 2 subunit	15	1	0	0	1	2	hsa-miR-873-3p	0.0112	0.0808	0.5082	-0.11	-0.11	N/A
ST8SIA1	ENST00000396037.4	ST8 alpha-N-acetyl-neuraminide alpha-2,8-sialyltransferase 1	5	2	0	1	1	1	hsa-miR-873-3p	0.0172	0.1233	0.7543	-0.11	-0.11	N/A
PAX3	ENST00000350526.4	paired box 3	7	1	0	0	1	0	hsa-miR-873-3p	0.0084	0.0601	0.3593	-0.11	-0.11	N/A
KRT222	ENST00000394052.3	keratin 222	9	1	0	1	0	0	hsa-miR-873-3p	0.007	0.0474	0.2134	-0.11	-0.25	N/A
DNAJC27	ENST00000264711.2	DnaJ (Hsp40) homolog, subfamily C, member 27	41	2	0	1	1	0	hsa-miR-873-3p	0.0209	0.1417	0.6631	-0.11	-0.13	N/A
NFIB	ENST00000397575.3	nuclear factor I/B	1149	2	0	2	0	1	hsa-miR-873-3p	0.0204	0.1424	0.7582	-0.11	-0.12	N/A
QTRTD1	ENST00000281273.4	queuine tRNA-ribosyltransferase domain containing 1	123	1	0	0	1	1	hsa-miR-873-3p	0.0042	0.0307	0.2015	-0.11	-0.11	N/A
ASB2	ENST00000555019.1	ankyrin repeat and SOCS box containing 2	5	1	0	0	1	0	hsa-miR-873-3p	0.0039	0.0279	0.1818	-0.11	-0.11	N/A
PLA2G4E	ENST00000399518.3	phospholipase A2, group IVE	5	3	0	1	2	0	hsa-miR-873-3p	0.014	0.0996	0.5975	-0.11	-0.11	N/A
ZFPM2	ENST00000407775.2	zinc finger protein, FOG family member 2	595	1	0	1	0	0	hsa-miR-873-3p	0.0101	0.0718	0.4224	-0.11	-0.11	N/A
INSM1	ENST00000310227.1	insulinoma-associated 1	20	1	0	1	0	0	hsa-miR-873-3p	0.0054	0.0382	0.227	-0.11	-0.11	N/A
SREK1IP1	ENST00000513458.4	SREK1-interacting protein 1	145	1	1	0	0	0	hsa-miR-873-3p	0.0091	0.0612	0.2853	-0.11	-0.33	N/A
MYO10	ENST00000513610.1	myosin X	3866	3	1	0	2	0	hsa-miR-873-3p	0.0063	0.046	0.3037	-0.11	-0.15	N/A
KCNJ6	ENST00000609713.1	potassium inwardly-rectifying channel, subfamily J, member 6	5	5	1	1	3	4	hsa-miR-873-3p	0.0414	0.2975	1.8499	-0.11	-0.11	N/A
TOR2A	ENST00000458505.3	torsin family 2, member A	75	1	0	0	1	0	hsa-miR-873-3p	0.0033	0.0239	0.1691	-0.11	-0.11	N/A
PTPN7	ENST00000367279.4	protein tyrosine phosphatase, non-receptor type 7	5	2	0	1	1	0	hsa-miR-873-3p	0.008	0.0573	0.3574	-0.11	-0.11	N/A
CAPZA1	ENST00000263168.3	capping protein (actin filament) muscle Z-line, alpha 1	1159	1	0	1	0	1	hsa-miR-873-3p	0.0068	0.0485	0.2735	-0.11	-0.11	N/A
FAIM3	ENST00000420007.2	Fas apoptotic inhibitory molecule 3	311	3	2	0	1	0	hsa-miR-873-3p	0.0047	0.0316	0.1547	-0.11	-0.71	N/A
DSCR3	ENST00000309117.6	Down syndrome critical region gene 3	494	3	0	1	2	0	hsa-miR-873-3p	0.0166	0.1089	0.4583	-0.11	-0.16	N/A
KIAA0226	ENST00000273582.5	KIAA0226	89	1	1	0	0	2	hsa-miR-873-3p	0.032	0.2	0.772	-0.11	-0.15	N/A
FRG1B	ENST00000278882.3	FSHD region gene 1 family, member B	94	1	0	1	0	0	hsa-miR-873-3p	0.0052	0.0366	0.2103	-0.11	-0.2	N/A
KBTBD13	ENST00000432196.2	kelch repeat and BTB (POZ) domain containing 13	5	1	0	0	1	1	hsa-miR-873-3p	0.0119	0.0841	0.4855	-0.11	-0.11	N/A
SLC15A5	ENST00000344941.3	solute carrier family 15, member 5	5	1	0	0	1	0	hsa-miR-873-3p	0.0023	0.0169	0.1127	-0.11	-0.11	N/A
SYCE1	ENST00000343131.5	synaptonemal complex central element protein 1	5	1	0	1	0	0	hsa-miR-873-3p	0.0046	0.0331	0.2018	-0.11	-0.11	N/A
GPCPD1	ENST00000379019.4	glycerophosphocholine phosphodiesterase GDE1 homolog (S. cerevisiae)	155	1	0	1	0	0	hsa-miR-873-3p	0.0056	0.0399	0.2466	-0.11	-0.11	N/A
BVES	ENST00000314641.5	blood vessel epicardial substance	30	2	0	2	0	0	hsa-miR-873-3p	0.0171	0.1201	0.6728	-0.11	-0.11	N/A
SYBU	ENST00000533895.1	syntabulin (syntaxin-interacting)	83	1	0	1	0	0	hsa-miR-873-3p	0.005	0.0363	0.2296	-0.11	-0.11	N/A
RP5-850E9.3	ENST00000488788.2	Uncharacterized protein	10	1	0	1	0	1	hsa-miR-873-3p	0.0055	0.0394	0.2324	-0.11	-0.22	N/A
ZC3H18	ENST00000301011.5	zinc finger CCCH-type containing 18	15	1	0	0	1	0	hsa-miR-873-3p	0.003	0.0218	0.1428	-0.11	-0.16	N/A
PRDM11	ENST00000263765.4	PR domain containing 11	11	1	1	0	0	0	hsa-miR-873-3p	0.0036	0.0254	0.1476	-0.11	-0.26	N/A
CCSER2	ENST00000224756.8	coiled-coil serine-rich protein 2	123	3	0	2	1	1	hsa-miR-873-3p	0.037	0.2266	0.7669	-0.11	-0.14	N/A
FGF2	ENST00000264498.3	fibroblast growth factor 2 (basic)	123	1	0	1	0	0	hsa-miR-873-3p	0.0109	0.0767	0.431	-0.11	-0.15	N/A
PAX9	ENST00000361487.6	paired box 9	53	1	0	1	0	0	hsa-miR-873-3p	0.0119	0.0844	0.4868	-0.11	-0.13	N/A
TAF11	ENST00000420584.2	TAF11 RNA polymerase II, TATA box binding protein (TBP)-associated factor, 28kDa	18	1	0	1	0	0	hsa-miR-873-3p	0.014	0.0951	0.4411	-0.11	-0.11	N/A
KCNIP1	ENST00000328939.4	Kv channel interacting protein 1	5	1	0	1	0	0	hsa-miR-873-3p	0.0102	0.071	0.3609	-0.11	-0.11	N/A
KLHL3	ENST00000541417.1	kelch-like family member 3	40	1	0	0	1	0	hsa-miR-873-3p	0.0096	0.0698	0.4643	-0.11	-0.13	N/A
AP4S1	ENST00000334725.4	adaptor-related protein complex 4, sigma 1 subunit	12	2	1	1	0	2	hsa-miR-873-3p	0.0076	0.0538	0.3198	-0.11	-0.19	N/A
DDX21	ENST00000354185.4	DEAD (Asp-Glu-Ala-Asp) box helicase 21	202	1	0	1	0	0	hsa-miR-873-3p	0.0254	0.1634	0.6487	-0.11	-0.12	N/A
APOL4	ENST00000404685.3	apolipoprotein L, 4	5	1	0	1	0	1	hsa-miR-873-3p	0.0137	0.0953	0.5036	-0.11	-0.11	N/A
CD180	ENST00000256447.4	CD180 molecule	5	1	0	0	1	2	hsa-miR-873-3p	0.0057	0.0416	0.2804	-0.11	-0.11	N/A
EYA2	ENST00000327619.5	eyes absent homolog 2 (Drosophila)	15	1	0	0	1	0	hsa-miR-873-3p	0.0054	0.0385	0.2318	-0.11	-0.11	N/A
TMEM91	ENST00000539627.1	transmembrane protein 91	231	1	0	0	1	0	hsa-miR-873-3p	0.0011	0.008	0.0565	-0.11	-0.11	N/A
KIAA0040	ENST00000423313.1	KIAA0040	15	1	1	0	0	0	hsa-miR-873-3p	0.0066	0.0477	0.3043	-0.11	-0.11	N/A
BLMH	ENST00000261714.6	bleomycin hydrolase	1511	1	0	1	0	0	hsa-miR-873-3p	0.0117	0.0822	0.4552	-0.11	-0.11	N/A
ZNF157	ENST00000377073.3	zinc finger protein 157	5	2	0	1	1	0	hsa-miR-873-3p	0.0137	0.0939	0.4497	-0.11	-0.11	N/A
PHF15	ENST00000402835.1	PHD finger protein 15	387	4	1	3	0	0	hsa-miR-873-3p	0.0229	0.1597	0.846	-0.11	-0.13	N/A
TOMM34	ENST00000372813.3	translocase of outer mitochondrial membrane 34	1242	2	0	2	0	0	hsa-miR-873-3p	0.0149	0.1037	0.5401	-0.11	-0.11	N/A
AL627309.1	ENST00000423372.3	Uncharacterized protein	5	1	0	1	0	0	hsa-miR-873-3p	0.0132	0.0907	0.4392	-0.11	-0.11	N/A
TGFBR2	ENST00000359013.4	transforming growth factor, beta receptor II (70/80kDa)	2168	3	2	0	1	1	hsa-miR-873-3p	0.0069	0.0505	0.3397	-0.11	-0.2	N/A
HS3ST3A1	ENST00000284110.1	heparan sulfate (glucosamine) 3-O-sulfotransferase 3A1	148	3	1	1	1	0	hsa-miR-873-3p	0.0092	0.0643	0.3398	-0.11	-0.23	N/A
TXNIP	ENST00000369317.4	thioredoxin interacting protein	11	1	0	1	0	0	hsa-miR-873-3p	0.0071	0.0502	0.281	-0.11	-0.11	N/A
ZNF75D	ENST00000370766.3	zinc finger protein 75D	5	1	0	0	1	0	hsa-miR-873-3p	0.0031	0.0227	0.1487	-0.11	-0.11	N/A
CYSLTR2	ENST00000282018.3	cysteinyl leukotriene receptor 2	5	1	0	1	0	2	hsa-miR-873-3p	0.023	0.158	0.7693	-0.11	-0.12	N/A
ILF2	ENST00000361891.4	interleukin enhancer binding factor 2	5746	1	0	1	0	0	hsa-miR-873-3p	0.0048	0.0344	0.2085	-0.11	-0.11	N/A
ZMYM2	ENST00000382869.3	zinc finger, MYM-type 2	172	1	1	0	0	0	hsa-miR-873-3p	0.0104	0.073	0.3995	-0.11	-0.18	N/A
SLC9B2	ENST00000503103.1	solute carrier family 9, subfamily B (NHA2, cation proton antiporter 2), member 2	22	1	0	1	0	1	hsa-miR-873-3p	0.0058	0.0413	0.2483	-0.11	-0.14	N/A
MAMLD1	ENST00000370401.2	mastermind-like domain containing 1	1442	1	0	1	0	0	hsa-miR-873-3p	0.0305	0.1905	0.674	-0.11	-0.11	N/A
GABPB2	ENST00000368918.3	GA binding protein transcription factor, beta subunit 2	35	2	0	2	0	3	hsa-miR-873-3p	0.0236	0.1633	0.8483	-0.11	-0.16	N/A
FBXO30	ENST00000237281.4	F-box protein 30	224	2*	0	1	0	1	hsa-miR-873-3p	0.0118	0.083	0.4644	-0.11	-0.11	N/A
DTL	ENST00000366991.4	denticleless E3 ubiquitin protein ligase homolog (Drosophila)	883	1	0	1	0	0	hsa-miR-873-3p	0.0069	0.0498	0.3074	-0.11	-0.12	N/A
ALOX15	ENST00000570836.1	arachidonate 15-lipoxygenase	5	2	0	0	2	0	hsa-miR-873-3p	0.0025	0.0184	0.1295	-0.11	-0.15	N/A
ZNF831	ENST00000371030.2	zinc finger protein 831	5	1	1	0	0	0	hsa-miR-873-3p	0.0102	0.0726	0.4278	-0.11	-0.11	N/A
OLFML2B	ENST00000294794.3	olfactomedin-like 2B	5	1	0	0	1	0	hsa-miR-873-3p	0.0048	0.0352	0.2306	-0.11	-0.11	N/A
SULF1	ENST00000458141.2	sulfatase 1	11	1	1	0	0	0	hsa-miR-873-3p	0.0158	0.1064	0.4726	-0.11	-0.11	N/A
TMEM178B	ENST00000565468.1	transmembrane protein 178B	129	3	0	1	2	0	hsa-miR-873-3p	0.0219	0.1526	0.832	-0.11	-0.11	N/A
LSM12	ENST00000585388.1	LSM12 homolog (S. cerevisiae)	20	2	1	1	0	1	hsa-miR-873-3p	0.0105	0.0754	0.4732	-0.11	-0.16	N/A
SEMA5B	ENST00000195173.4	sema domain, seven thrombospondin repeats (type 1 and type 1-like), transmembrane domain (TM) and short cytoplasmic domain, (semaphorin) 5B	15	1	0	1	0	1	hsa-miR-873-3p	0.0101	0.0701	0.3623	-0.11	-0.16	N/A
STRBP	ENST00000447404.2	spermatid perinuclear RNA binding protein	575	1	0	0	1	2	hsa-miR-873-3p	0.0034	0.0252	0.176	-0.11	-0.11	N/A
PRR18	ENST00000322583.3	proline rich 18	15	1	0	1	0	0	hsa-miR-873-3p	0.0124	0.085	0.407	-0.11	-0.11	N/A
TYW1	ENST00000359626.5	tRNA-yW synthesizing protein 1 homolog (S. cerevisiae)	7	1	0	0	1	0	hsa-miR-873-3p	0.0058	0.0421	0.2701	-0.11	-0.11	N/A
GRK4	ENST00000503518.2	G protein-coupled receptor kinase 4	50	3	1	1	1	0	hsa-miR-873-3p	0.0066	0.0453	0.2291	-0.11	-0.46	N/A
TLDC2	ENST00000217320.3	TBC/LysM-associated domain containing 2	5	1	0	0	1	0	hsa-miR-873-3p	0.0055	0.04	0.2723	-0.11	-0.11	N/A
KBTBD11	ENST00000320248.3	kelch repeat and BTB (POZ) domain containing 11	173	1	0	1	0	0	hsa-miR-873-3p	0.0122	0.0861	0.4912	-0.11	-0.11	N/A
ANKS4B	ENST00000311620.5	ankyrin repeat and sterile alpha motif domain containing 4B	40	1	0	1	0	1	hsa-miR-873-3p	0.0079	0.0563	0.3453	-0.11	-0.15	N/A
DESI2	ENST00000302550.11	desumoylating isopeptidase 2	147	1	0	0	1	1	hsa-miR-873-3p	0.0061	0.044	0.2828	-0.11	-0.11	N/A
TRAM2	ENST00000182527.3	translocation associated membrane protein 2	2774	3	0	2	1	0	hsa-miR-873-3p	0.0239	0.1676	0.9239	-0.11	-0.11	N/A
PRRG4	ENST00000257836.3	proline rich Gla (G-carboxyglutamic acid) 4 (transmembrane)	47	2	0	1	1	0	hsa-miR-873-3p	0.0092	0.0643	0.3416	-0.11	-0.14	N/A
GALNT10	ENST00000297107.6	UDP-N-acetyl-alpha-D-galactosamine:polypeptide N-acetylgalactosaminyltransferase 10 (GalNAc-T10)	3445	2	0	0	2	3	hsa-miR-873-3p	0.0164	0.1185	0.7473	-0.11	-0.11	N/A
RFESD	ENST00000513950.2	Rieske (Fe-S) domain containing	15	1	0	0	1	1	hsa-miR-873-3p	0.0053	0.0385	0.2422	-0.11	-0.23	N/A
CXorf56	ENST00000320339.4	chromosome X open reading frame 56	279	1	0	1	0	1	hsa-miR-873-3p	0.0039	0.0283	0.1831	-0.11	-0.12	N/A
P2RY2	ENST00000311131.2	purinergic receptor P2Y, G-protein coupled, 2	66	4	1	2	1	0	hsa-miR-873-3p	0.0206	0.1414	0.6967	-0.11	-0.22	N/A
ITSN1	ENST00000379960.5	intersectin 1 (SH3 domain protein)	194	1	0	1	0	2	hsa-miR-873-3p	0.0123	0.0874	0.5104	-0.11	-0.11	N/A
KCNA6	ENST00000433855.1	potassium voltage-gated channel, shaker-related subfamily, member 6	5	2	0	1	1	0	hsa-miR-873-3p	0.0139	0.0978	0.5397	-0.11	-0.2	N/A
KNOP1	ENST00000219837.7	lysine-rich nucleolar protein 1	157	5	2	1	2	0	hsa-miR-873-3p	0.0273	0.1883	0.9553	-0.11	-0.19	N/A
MILR1	ENST00000605096.1	mast cell immunoglobulin-like receptor 1	5	1	0	0	1	0	hsa-miR-873-3p	0.0005	0.004	0.0289	-0.1	-0.1	N/A
LDB3	ENST00000542786.1	LIM domain binding 3	33	1	0	1	0	0	hsa-miR-873-3p	0.0075	0.0529	0.2919	-0.1	-0.1	N/A
C17orf104	ENST00000409122.2	chromosome 17 open reading frame 104	5	1	0	0	1	0	hsa-miR-873-3p	0.0056	0.0404	0.2445	-0.1	-0.1	N/A
SPATS2	ENST00000553127.1	spermatogenesis associated, serine-rich 2	779	1	1	0	0	0	hsa-miR-873-3p	0.0052	0.0358	0.189	-0.1	-0.33	N/A
DHFR	ENST00000511032.1	dihydrofolate reductase	5	1	0	0	1	1	hsa-miR-873-3p	0.0018	0.0132	0.0899	-0.1	-0.1	N/A
HIATL2	ENST00000602917.1	hippocampus abundant transcript-like 2	111	2	0	0	2	0	hsa-miR-873-3p	0.0043	0.0311	0.2093	-0.1	-0.11	N/A
CREBRF	ENST00000540014.1	CREB3 regulatory factor	24	1	0	0	1	1	hsa-miR-873-3p	0.0101	0.0726	0.454	-0.1	-0.18	N/A
MCU	ENST00000373053.3	mitochondrial calcium uniporter	2421	1	0	1	0	0	hsa-miR-873-3p	0.0091	0.0634	0.3334	-0.1	-0.1	N/A
ARPP19	ENST00000566423.1	cAMP-regulated phosphoprotein, 19kDa	1316	2	1	0	1	1	hsa-miR-873-3p	0.0067	0.0462	0.2317	-0.1	-0.36	N/A
MXRA7	ENST00000355797.3	matrix-remodelling associated 7	421	3	1	0	2	1	hsa-miR-873-3p	0.0141	0.0999	0.587	-0.1	-0.14	N/A
NAA40	ENST00000377793.4	N(alpha)-acetyltransferase 40, NatD catalytic subunit	217	2	0	1	1	1	hsa-miR-873-3p	0.0129	0.0927	0.5803	-0.1	-0.16	N/A
CAPN7	ENST00000253693.2	calpain 7	76	2	0	1	1	0	hsa-miR-873-3p	0.0079	0.0556	0.2985	-0.1	-0.13	N/A
SRXN1	ENST00000381962.3	sulfiredoxin 1	10	1	0	1	0	1	hsa-miR-873-3p	0.0055	0.0394	0.2324	-0.1	-0.21	N/A
TPH2	ENST00000333850.3	tryptophan hydroxylase 2	5	1	0	0	1	0	hsa-miR-873-3p	0.0022	0.0157	0.1054	-0.1	-0.1	N/A
ZNF582	ENST00000301310.4	zinc finger protein 582	57	1	0	1	0	0	hsa-miR-873-3p	0.0131	0.0898	0.4379	-0.1	-0.1	N/A
LSM4	ENST00000593829.1	LSM4 homolog, U6 small nuclear RNA associated (S. cerevisiae)	469	1	0	1	0	0	hsa-miR-873-3p	0.006	0.0429	0.249	-0.1	-0.1	N/A
BCL6B	ENST00000293805.5	B-cell CLL/lymphoma 6, member B	7	1	0	1	0	1	hsa-miR-873-3p	0.0063	0.0455	0.2782	-0.1	-0.1	N/A
KCNA7	ENST00000221444.1	potassium voltage-gated channel, shaker-related subfamily, member 7	11	3	0	0	3	0	hsa-miR-873-3p	0.0099	0.0723	0.4993	-0.1	-0.1	N/A
ANKDD1A	ENST00000496660.1	ankyrin repeat and death domain containing 1A	11	1	0	0	1	0	hsa-miR-873-3p	0.0013	0.0093	0.0648	-0.1	-0.1	N/A
WDR33	ENST00000322313.4	WD repeat domain 33	537	1	0	0	1	0	hsa-miR-873-3p	0.0023	0.0165	0.1133	-0.1	-0.1	N/A
C3orf56	ENST00000398112.1	chromosome 3 open reading frame 56	5	1	0	0	1	0	hsa-miR-873-3p	0.0023	0.0165	0.1102	-0.1	-0.1	N/A
C11orf49	ENST00000395460.2	chromosome 11 open reading frame 49	1263	1	0	1	0	0	hsa-miR-873-3p	0.0079	0.0557	0.3037	-0.1	-0.1	N/A
APOOL	ENST00000373173.2	apolipoprotein O-like	109	2	1	0	1	0	hsa-miR-873-3p	0.0106	0.0697	0.3008	-0.1	-0.29	N/A
SAMD8	ENST00000372687.4	sterile alpha motif domain containing 8	100	2	1	0	1	0	hsa-miR-873-3p	0.0113	0.0772	0.3794	-0.1	-0.22	N/A
TMEM242	ENST00000400788.4	transmembrane protein 242	593	2	0	1	1	0	hsa-miR-873-3p	0.0106	0.0724	0.3429	-0.1	-0.16	N/A
ZNF160	ENST00000599056.1	zinc finger protein 160	68	2	0	1	1	0	hsa-miR-873-3p	0.0219	0.146	0.6468	-0.1	-0.1	N/A
TRMT13	ENST00000370141.2	tRNA methyltransferase 13 homolog (S. cerevisiae)	45	1	0	0	1	0	hsa-miR-873-3p	0.0035	0.0249	0.1582	-0.1	-0.11	N/A
YRDC	ENST00000373044.2	yrdC N(6)-threonylcarbamoyltransferase domain containing	2195	2	0	0	2	0	hsa-miR-873-3p	0.0048	0.0349	0.2202	-0.1	-0.25	N/A
RP11-758M4.1	ENST00000523118.1	Uncharacterized protein	5	1	0	0	1	0	hsa-miR-873-3p	0.0025	0.0179	0.1184	-0.1	-0.1	N/A
SFRP5	ENST00000266066.3	secreted frizzled-related protein 5	28	1	0	0	1	0	hsa-miR-873-3p	0.0016	0.0121	0.0867	-0.1	-0.1	N/A
GLP1R	ENST00000373256.4	glucagon-like peptide 1 receptor	5	1	0	1	0	0	hsa-miR-873-3p	0.0082	0.0579	0.3122	-0.1	-0.1	N/A
TRIM10	ENST00000449742.2	tripartite motif containing 10	7	1	0	1	0	0	hsa-miR-873-3p	0.0227	0.1467	0.5595	-0.1	-0.1	N/A
HTR5A-AS1	ENST00000395731.2	HTR5A antisense RNA 1	5	2	0	0	2	0	hsa-miR-873-3p	0.0053	0.0383	0.248	-0.1	-0.1	N/A
RET	ENST00000355710.3	ret proto-oncogene	5	2	0	0	2	0	hsa-miR-873-3p	0.0075	0.0535	0.328	-0.1	-0.1	N/A
SPOPL	ENST00000280098.4	speckle-type POZ protein-like	216	1	0	0	1	0	hsa-miR-873-3p	0.0037	0.0272	0.1818	-0.1	-0.13	N/A
PTBP1	ENST00000350092.4	polypyrimidine tract binding protein 1	7007	1	0	0	1	0	hsa-miR-873-3p	0.0077	0.0553	0.3443	-0.1	-0.1	N/A
LMBRD2	ENST00000296603.4	LMBR1 domain containing 2	211	1	1	0	0	0	hsa-miR-873-3p	0.0146	0.0987	0.4672	-0.1	-0.15	N/A
LINC00346	ENST00000538077.1	long intergenic non-protein coding RNA 346	26	3	1	2	0	0	hsa-miR-873-3p	0.0209	0.1405	0.6499	-0.1	-0.21	N/A
POU5F1B	ENST00000465342.2	POU class 5 homeobox 1B	5	2	0	1	1	0	hsa-miR-873-3p	0.0114	0.0818	0.5118	-0.1	-0.1	N/A
NCOA4	ENST00000452682.1	nuclear receptor coactivator 4	1665	1	0	1	0	0	hsa-miR-873-3p	0.0144	0.0982	0.4613	-0.1	-0.1	N/A
CLASP1	ENST00000409078.3	cytoplasmic linker associated protein 1	210	2	0	2	0	2	hsa-miR-873-3p	0.0435	0.293	1.3904	-0.1	-0.1	N/A
SMC1A	ENST00000322213.4	structural maintenance of chromosomes 1A	1626	1	0	0	1	0	hsa-miR-873-3p	0.0055	0.0399	0.2546	-0.1	-0.11	N/A
STIM2	ENST00000467011.1	stromal interaction molecule 2	380	2	0	1	1	0	hsa-miR-873-3p	0.0179	0.1201	0.5293	-0.1	-0.14	N/A
G3BP1	ENST00000394123.3	GTPase activating protein (SH3 domain) binding protein 1	688	1	0	0	1	2	hsa-miR-873-3p	0.0055	0.0402	0.2689	-0.1	-0.13	N/A
AMIGO1	ENST00000369864.4	adhesion molecule with Ig-like domain 1	167	2	0	2	0	2	hsa-miR-873-3p	0.0235	0.1635	0.8606	-0.1	-0.1	N/A
CDCA8	ENST00000373055.1	cell division cycle associated 8	1689	1	0	1	0	0	hsa-miR-873-3p	0.0153	0.1029	0.4587	-0.1	-0.1	N/A
ALOX15B	ENST00000380183.4	arachidonate 15-lipoxygenase, type B	5	1	0	0	1	0	hsa-miR-873-3p	0.0032	0.023	0.154	-0.1	-0.1	N/A
PREX2	ENST00000288368.4	phosphatidylinositol-3,4,5-trisphosphate-dependent Rac exchange factor 2	11	2	0	0	2	0	hsa-miR-873-3p	0.0063	0.046	0.3089	-0.1	-0.1	N/A
TNC	ENST00000340094.3	tenascin C	4571	1	0	1	0	0	hsa-miR-873-3p	0.0195	0.1349	0.6948	-0.1	-0.1	N/A
GIT2	ENST00000355312.3	G protein-coupled receptor kinase interacting ArfGAP 2	924	1	0	1	0	0	hsa-miR-873-3p	0.0132	0.092	0.4899	-0.1	-0.1	N/A
FKBP4	ENST00000001008.4	FK506 binding protein 4, 59kDa	727	1	0	1	0	1	hsa-miR-873-3p	0.011	0.0775	0.4307	-0.1	-0.14	N/A
CCDC86	ENST00000227520.5	coiled-coil domain containing 86	37	1	0	1	0	0	hsa-miR-873-3p	0.0084	0.057	0.267	-0.1	-0.17	N/A
NPAP1	ENST00000329468.2	nuclear pore associated protein 1	5	1	0	0	1	1	hsa-miR-873-3p	0.0124	0.0899	0.5766	-0.1	-0.1	N/A
CLEC4E	ENST00000299663.3	C-type lectin domain family 4, member E	5	1	0	0	1	0	hsa-miR-873-3p	0.0065	0.0468	0.3026	-0.1	-0.1	N/A
C6	ENST00000337836.5	complement component 6	10	1	0	1	0	0	hsa-miR-873-3p	0.0113	0.0806	0.469	-0.1	-0.1	N/A
MLLT6	ENST00000325718.7	myeloid/lymphoid or mixed-lineage leukemia (trithorax homolog, Drosophila); translocated to, 6	24	1	0	1	0	0	hsa-miR-873-3p	0.0143	0.1023	0.6161	-0.1	-0.1	N/A
LDLRAD3	ENST00000315571.5	low density lipoprotein receptor class A domain containing 3	90	1	0	0	1	1	hsa-miR-873-3p	0.0136	0.0962	0.5417	-0.1	-0.1	N/A
METTL6	ENST00000443029.1	methyltransferase like 6	20	1	0	0	1	2	hsa-miR-873-3p	0.0108	0.0783	0.5254	-0.1	-0.1	N/A
DAZAP2	ENST00000412716.3	DAZ associated protein 2	4265	1	0	1	0	0	hsa-miR-873-3p	0.0072	0.051	0.2993	-0.1	-0.11	N/A
ACSS2	ENST00000336325.4	acyl-CoA synthetase short-chain family member 2	4548	1	0	1	0	0	hsa-miR-873-3p	0.0105	0.0733	0.3924	-0.1	-0.1	N/A
PTCD2	ENST00000380639.5	pentatricopeptide repeat domain 2	377	4	0	1	3	1	hsa-miR-873-3p	0.0162	0.111	0.5461	-0.1	-0.18	N/A
RCL1	ENST00000381750.4	RNA terminal phosphate cyclase-like 1	203	2	0	1	1	0	hsa-miR-873-3p	0.0136	0.0917	0.4099	-0.1	-0.13	N/A
TM4SF1	ENST00000472441.1	transmembrane 4 L six family member 1	1401	1	0	0	1	0	hsa-miR-873-3p	0.0031	0.0225	0.1581	-0.1	-0.1	N/A
TIFAB	ENST00000537858.1	TRAF-interacting protein with forkhead-associated domain, family member B	5	1	1	0	0	1	hsa-miR-873-3p	0.019	0.1307	0.6593	-0.1	-0.1	N/A
AC010336.1	ENST00000539278.1	Uncharacterized protein	8	1	0	1	0	0	hsa-miR-873-3p	0.0107	0.0741	0.3844	-0.1	-0.1	N/A
PCGF5	ENST00000336126.5	polycomb group ring finger 5	176	1	0	0	1	1	hsa-miR-873-3p	0.0037	0.0267	0.1786	-0.1	-0.11	N/A
NUCKS1	ENST00000367142.4	nuclear casein kinase and cyclin-dependent kinase substrate 1	1692	2	0	2	0	0	hsa-miR-873-3p	0.0105	0.0721	0.3697	-0.1	-0.32	N/A
TADA3	ENST00000301964.2	transcriptional adaptor 3	135	1	0	1	0	1	hsa-miR-873-3p	0.0036	0.026	0.1774	-0.1	-0.1	N/A
CALCRL	ENST00000392370.3	calcitonin receptor-like	18	1	0	0	1	0	hsa-miR-873-3p	0.0057	0.0409	0.2501	-0.1	-0.1	N/A
ANKRD44	ENST00000282272.8	ankyrin repeat domain 44	187	1	0	0	1	0	hsa-miR-873-3p	0.0062	0.0454	0.2982	-0.1	-0.1	N/A
C5orf60	ENST00000448248.2	chromosome 5 open reading frame 60	5	1	0	0	1	0	hsa-miR-873-3p	0.0005	0.0034	0.0244	-0.1	-0.1	N/A
MYOCD	ENST00000425538.1	myocardin	62	3	0	3	0	0	hsa-miR-873-3p	0.0394	0.2612	1.1199	-0.1	-0.13	N/A
NAT10	ENST00000257829.3	N-acetyltransferase 10 (GCN5-related)	132	2	0	0	2	3	hsa-miR-873-3p	0.0069	0.0501	0.3365	-0.1	-0.11	N/A
NBL1	ENST00000375136.3	neuroblastoma 1, DAN family BMP antagonist	852	1	0	1	0	0	hsa-miR-873-3p	0.0133	0.0924	0.4845	-0.1	-0.1	N/A
RANBP10	ENST00000317506.3	RAN binding protein 10	140	2	1	1	0	0	hsa-miR-873-3p	0.0173	0.1198	0.6151	-0.1	-0.1	N/A
ZYG11B	ENST00000294353.6	zyg-11 family member B, cell cycle regulator	975	1	0	1	0	0	hsa-miR-873-3p	0.0206	0.1381	0.6328	-0.1	-0.1	N/A
POU4F1	ENST00000377208.5	POU class 4 homeobox 1	61	1	0	1	0	0	hsa-miR-873-3p	0.0172	0.1189	0.6206	-0.1	-0.1	N/A
CHRNA9	ENST00000310169.2	cholinergic receptor, nicotinic, alpha 9 (neuronal)	20	1	0	0	1	0	hsa-miR-873-3p	0.0014	0.0104	0.0722	-0.1	-0.1	N/A
MKRN2	ENST00000170447.7	makorin ring finger protein 2	104	1	0	0	1	0	hsa-miR-873-3p	0.0015	0.0113	0.0785	-0.1	-0.1	N/A
IGDCC4	ENST00000352385.2	immunoglobulin superfamily, DCC subclass, member 4	12	1	0	0	1	0	hsa-miR-873-3p	0.0022	0.0158	0.1111	-0.1	-0.1	N/A
ANKRD49	ENST00000544253.1	ankyrin repeat domain 49	32	1	0	1	0	1	hsa-miR-873-3p	0.0131	0.0901	0.4679	-0.1	-0.19	N/A
EPS8L2	ENST00000318562.8	EPS8-like 2	1419	1	0	0	1	1	hsa-miR-873-3p	0.0028	0.0202	0.1387	-0.1	-0.1	N/A
MINOS1-NBL1	ENST00000602662.1	MINOS1-NBL1 readthrough	852	1	0	1	0	0	hsa-miR-873-3p	0.0132	0.0919	0.4819	-0.1	-0.1	N/A
MRRF	ENST00000344641.3	mitochondrial ribosome recycling factor	85	1	0	1	0	1	hsa-miR-873-3p	0.0115	0.0784	0.4138	-0.1	-0.21	N/A
CACNB4	ENST00000539935.1	calcium channel, voltage-dependent, beta 4 subunit	57	2	0	1	1	1	hsa-miR-873-3p	0.0254	0.1744	0.8694	-0.1	-0.1	N/A
FAM196B	ENST00000377365.3	family with sequence similarity 196, member B	174	1	0	1	0	0	hsa-miR-873-3p	0.0202	0.1381	0.6778	-0.1	-0.1	N/A
NUP160	ENST00000378460.2	nucleoporin 160kDa	997	1	0	0	1	0	hsa-miR-873-3p	0.0098	0.0712	0.4703	-0.1	-0.1	N/A
PTDSS1	ENST00000517309.1	phosphatidylserine synthase 1	91	1	0	1	0	0	hsa-miR-873-3p	0.0166	0.1111	0.4837	-0.1	-0.1	N/A
AL591479.1	ENST00000594172.1	Uncharacterized protein	5	1	0	0	1	0	hsa-miR-873-3p	0.0046	0.0328	0.2001	-0.1	-0.1	N/A
HSF5	ENST00000323777.3	heat shock transcription factor family member 5	5	1	0	1	0	0	hsa-miR-873-3p	0.0078	0.0552	0.3016	-0.1	-0.1	N/A
FOXM1	ENST00000342628.2	forkhead box M1	1476	1	0	1	0	0	hsa-miR-873-3p	0.0076	0.0536	0.295	-0.1	-0.1	N/A
PLD5	ENST00000536534.2	phospholipase D family, member 5	5	1	0	1	0	0	hsa-miR-873-3p	0.019	0.131	0.6796	-0.1	-0.1	N/A
ANGPTL1	ENST00000234816.2	angiopoietin-like 1	5	1	0	0	1	0	hsa-miR-873-3p	0.0032	0.0229	0.1476	-0.1	-0.1	N/A
NUTM2E	ENST00000602967.1	NUT family member 2E	5	2*	1	0	0	0	hsa-miR-873-3p	0.0061	0.0433	0.2506	-0.1	-0.1	N/A
OGDH	ENST00000222673.5	oxoglutarate (alpha-ketoglutarate) dehydrogenase (lipoamide)	672	2	1	1	0	0	hsa-miR-873-3p	0.0173	0.1206	0.6399	-0.1	-0.1	N/A
PAPOLG	ENST00000238714.3	poly(A) polymerase gamma	49	1	1	0	0	1	hsa-miR-873-3p	0.0106	0.0738	0.3917	-0.1	-0.14	N/A
TCF4	ENST00000354452.3	transcription factor 4	394	1	0	0	1	0	hsa-miR-873-3p	0.0055	0.0399	0.2659	-0.1	-0.1	N/A
MSMO1	ENST00000261507.6	methylsterol monooxygenase 1	1413	1	1	0	0	0	hsa-miR-873-3p	0.0071	0.0508	0.2952	-0.1	-0.1	N/A
TMEM183A	ENST00000367242.3	transmembrane protein 183A	241	1	0	0	1	0	hsa-miR-873-3p	0.0028	0.0206	0.1409	-0.1	-0.11	N/A
NAT9	ENST00000357814.3	N-acetyltransferase 9 (GCN5-related, putative)	36	1	0	0	1	0	hsa-miR-873-3p	0.0042	0.0304	0.2107	-0.1	-0.1	N/A
RIMBP3C	ENST00000331505.5	RIMS binding protein 3C	5	1	0	0	1	0	hsa-miR-873-3p	0.0029	0.021	0.1398	-0.1	-0.1	N/A
ZNF587B	ENST00000442832.4	zinc finger protein 587B	5	1	1	0	0	0	hsa-miR-873-3p	0.0051	0.0368	0.2201	-0.1	-0.1	N/A
THEM6	ENST00000336138.3	thioesterase superfamily member 6	1500	1	1	0	0	0	hsa-miR-873-3p	0.0018	0.0128	0.0876	-0.1	-0.1	N/A
PNMAL1	ENST00000313683.10	paraneoplastic Ma antigen family-like 1	313	1	0	1	0	0	hsa-miR-873-3p	0.0171	0.1143	0.499	-0.1	-0.1	N/A
GPR37L1	ENST00000367282.5	G protein-coupled receptor 37 like 1	5	2	1	1	0	0	hsa-miR-873-3p	0.0346	0.2249	0.9482	-0.1	-0.1	N/A
FAM86A	ENST00000458008.4	family with sequence similarity 86, member A	5	1	1	0	0	0	hsa-miR-873-3p	0.0052	0.0376	0.2307	-0.1	-0.1	N/A
CASQ2	ENST00000261448.5	calsequestrin 2 (cardiac muscle)	5	1	0	0	1	0	hsa-miR-873-3p	0.0023	0.0166	0.1124	-0.1	-0.1	N/A
GFI1B	ENST00000450530.1	growth factor independent 1B transcription repressor	5	1	0	1	0	0	hsa-miR-873-3p	0.0096	0.0668	0.346	-0.1	-0.1	N/A
MSTO1	ENST00000245564.2	misato 1, mitochondrial distribution and morphology regulator	136	1	0	0	1	0	hsa-miR-873-3p	0.002	0.0148	0.0998	-0.1	-0.1	N/A
SGSM1	ENST00000400358.4	small G protein signaling modulator 1	25	1	0	0	1	0	hsa-miR-873-3p	0.007	0.0499	0.3049	-0.1	-0.1	N/A
ZNF275	ENST00000370251.3	zinc finger protein 275	465	2	1	0	1	0	hsa-miR-873-3p	0.0145	0.1014	0.5437	-0.09	-0.1	N/A
CABLES2	ENST00000279101.5	Cdk5 and Abl enzyme substrate 2	450	2	1	1	0	0	hsa-miR-873-3p	0.0165	0.1102	0.5081	-0.09	-0.25	N/A
ENOX2	ENST00000370935.1	ecto-NOX disulfide-thiol exchanger 2	215	3	0	1	2	0	hsa-miR-873-3p	0.0089	0.063	0.3639	-0.09	-0.16	N/A
KCTD2	ENST00000322444.6	potassium channel tetramerization domain containing 2	3328	2	0	2	0	0	hsa-miR-873-3p	0.019	0.13	0.6417	-0.09	-0.1	N/A
ST6GAL1	ENST00000169298.3	ST6 beta-galactosamide alpha-2,6-sialyltranferase 1	549	1	0	1	0	0	hsa-miR-873-3p	0.0064	0.0459	0.2745	-0.09	-0.1	N/A
TMEM186	ENST00000333050.6	transmembrane protein 186	287	1	0	0	1	2	hsa-miR-873-3p	0.0027	0.0196	0.1357	-0.09	-0.11	N/A
ILVBL	ENST00000263383.3	ilvB (bacterial acetolactate synthase)-like	3333	2	1	0	1	0	hsa-miR-873-3p	0.0009	0.0065	0.0455	-0.09	-0.41	N/A
SPCS3	ENST00000503362.1	signal peptidase complex subunit 3 homolog (S. cerevisiae)	1645	3	1	0	2	0	hsa-miR-873-3p	0.0075	0.0519	0.2719	-0.09	-0.37	N/A
VPS37A	ENST00000324849.4	vacuolar protein sorting 37 homolog A (S. cerevisiae)	339	1	1	0	0	1	hsa-miR-873-3p	0.0122	0.0787	0.3014	-0.09	-0.18	N/A
DNAJA1	ENST00000330899.4	DnaJ (Hsp40) homolog, subfamily A, member 1	789	1	0	0	1	0	hsa-miR-873-3p	0.0026	0.0189	0.1229	-0.09	-0.12	N/A
ART4	ENST00000228936.4	ADP-ribosyltransferase 4	5	1	0	1	0	0	hsa-miR-873-3p	0.0173	0.1185	0.5896	-0.09	-0.09	N/A
MDFI	ENST00000373050.4	MyoD family inhibitor	14	1	0	1	0	0	hsa-miR-873-3p	0.0081	0.0552	0.2641	-0.09	-0.15	N/A
CCDC137	ENST00000329214.8	coiled-coil domain containing 137	5	2	0	1	1	0	hsa-miR-873-3p	0.011	0.0773	0.4148	-0.09	-0.09	N/A
KLHL11	ENST00000319121.3	kelch-like family member 11	16	2	1	1	0	0	hsa-miR-873-3p	0.0127	0.0905	0.5271	-0.09	-0.14	N/A
MTBP	ENST00000305949.1	Mdm2, transformed 3T3 cell double minute 2, p53 binding protein (mouse) binding protein, 104kDa	58	1	0	1	0	0	hsa-miR-873-3p	0.0154	0.1059	0.5332	-0.09	-0.1	N/A
ABHD4	ENST00000428304.2	abhydrolase domain containing 4	102	1	0	1	0	0	hsa-miR-873-3p	0.0143	0.0989	0.5058	-0.09	-0.1	N/A
WARS2	ENST00000369426.5	tryptophanyl tRNA synthetase 2, mitochondrial	205	1	0	0	1	0	hsa-miR-873-3p	0.0032	0.0229	0.148	-0.09	-0.1	N/A
IL6ST	ENST00000381287.4	interleukin 6 signal transducer (gp130, oncostatin M receptor)	213	1	0	0	1	1	hsa-miR-873-3p	0.0052	0.0377	0.2416	-0.09	-0.1	N/A
SMG1	ENST00000446231.2	SMG1 phosphatidylinositol 3-kinase-related kinase	339	1	1	0	0	0	hsa-miR-873-3p	0.0083	0.0583	0.3282	-0.09	-0.14	N/A
ZFYVE27	ENST00000453958.2	zinc finger, FYVE domain containing 27	565	1	1	0	0	0	hsa-miR-873-3p	0.0098	0.0685	0.3575	-0.09	-0.09	N/A
FCRL6	ENST00000321935.6	Fc receptor-like 6	5	1	0	1	0	0	hsa-miR-873-3p	0.0129	0.0882	0.4295	-0.09	-0.09	N/A
SESN1	ENST00000436639.2	sestrin 1	96	1	0	1	0	0	hsa-miR-873-3p	0.0073	0.0517	0.2872	-0.09	-0.09	N/A
OR51E2	ENST00000396950.3	olfactory receptor, family 51, subfamily E, member 2	5	1	0	1	0	0	hsa-miR-873-3p	0.0069	0.0492	0.2987	-0.09	-0.09	N/A
SLC24A2	ENST00000341998.2	solute carrier family 24 (sodium/potassium/calcium exchanger), member 2	5	1	0	0	1	2	hsa-miR-873-3p	0.0185	0.1334	0.8343	-0.09	-0.09	N/A
TMEM14E	ENST00000408960.3	transmembrane protein 14E	5	1	0	1	0	0	hsa-miR-873-3p	0.0111	0.0779	0.4154	-0.09	-0.09	N/A
ABCC5	ENST00000334444.6	ATP-binding cassette, sub-family C (CFTR/MRP), member 5	453	1	0	1	0	1	hsa-miR-873-3p	0.0144	0.1005	0.5482	-0.09	-0.1	N/A
ZIC1	ENST00000282928.4	Zic family member 1	26	2	0	2	0	0	hsa-miR-873-3p	0.012	0.0824	0.3966	-0.09	-0.14	N/A
EIF2AK2	ENST00000233057.4	eukaryotic translation initiation factor 2-alpha kinase 2	292	3	1	0	2	1	hsa-miR-873-3p	0.0188	0.1272	0.6315	-0.09	-0.17	N/A
HN1	ENST00000476258.1	hematological and neurological expressed 1	15013	1	0	0	1	1	hsa-miR-873-3p	0.0016	0.0116	0.0771	-0.09	-0.18	N/A
AFF2	ENST00000370460.2	AF4/FMR2 family, member 2	8	2	1	1	0	0	hsa-miR-873-3p	0.0211	0.1468	0.783	-0.09	-0.15	N/A
ITGA1	ENST00000282588.6	integrin, alpha 1	400	1	0	1	0	1	hsa-miR-873-3p	0.0213	0.1412	0.6356	-0.09	-0.11	N/A
TPST1	ENST00000304842.5	tyrosylprotein sulfotransferase 1	423	1	0	1	0	0	hsa-miR-873-3p	0.0023	0.0168	0.112	-0.09	-0.09	N/A
CLEC4G	ENST00000328853.5	C-type lectin domain family 4, member G	5	1	0	0	1	0	hsa-miR-873-3p	0.0015	0.0112	0.0783	-0.09	-0.09	N/A
ASRGL1	ENST00000415229.2	asparaginase like 1	20	1	0	1	0	0	hsa-miR-873-3p	0.0171	0.1144	0.4964	-0.09	-0.09	N/A
PGAP3	ENST00000579146.1	post-GPI attachment to proteins 3	6	1	0	1	0	0	hsa-miR-873-3p	0.0053	0.0378	0.2248	-0.09	-0.09	N/A
ARL5A	ENST00000295087.8	ADP-ribosylation factor-like 5A	112	2	0	0	2	0	hsa-miR-873-3p	0.0017	0.0125	0.086	-0.09	-0.1	N/A
FLG2	ENST00000388718.5	filaggrin family member 2	5	1	0	1	0	0	hsa-miR-873-3p	0.0192	0.1314	0.6538	-0.09	-0.09	N/A
ZNF512	ENST00000355467.4	zinc finger protein 512	189	1	0	1	0	0	hsa-miR-873-3p	0.0182	0.1205	0.5068	-0.09	-0.09	N/A
KANK1	ENST00000382303.1	KN motif and ankyrin repeat domains 1	6	1	0	1	0	1	hsa-miR-873-3p	0.0148	0.1037	0.5704	-0.09	-0.09	N/A
ZSCAN30	ENST00000333206.5	zinc finger and SCAN domain containing 30	274	2	0	1	1	0	hsa-miR-873-3p	0.0103	0.0726	0.4092	-0.09	-0.09	N/A
PRR15L	ENST00000300557.2	proline rich 15-like	159	1	0	0	1	0	hsa-miR-873-3p	0.0019	0.0141	0.0954	-0.09	-0.09	N/A
EXO5	ENST00000296380.4	exonuclease 5	237	1	0	1	0	0	hsa-miR-873-3p	0.0044	0.0314	0.193	-0.09	-0.09	N/A
ZFHX4	ENST00000521891.2	zinc finger homeobox 4	194	2	0	0	2	0	hsa-miR-873-3p	0.0088	0.0641	0.4285	-0.09	-0.1	N/A
SEPT11	ENST00000264893.6	septin 11	515	1	0	0	1	2	hsa-miR-873-3p	0.011	0.0797	0.52	-0.09	-0.1	N/A
COL19A1	ENST00000322773.4	collagen, type XIX, alpha 1	5	2	0	1	1	0	hsa-miR-873-3p	0.0151	0.1036	0.5068	-0.09	-0.17	N/A
ANKH	ENST00000284268.6	ANKH inorganic pyrophosphate transport regulator	770	1	0	0	1	0	hsa-miR-873-3p	0.0026	0.0188	0.1224	-0.09	-0.1	N/A
ATP8B1	ENST00000283684.4	ATPase, aminophospholipid transporter, class I, type 8B, member 1	497	1	1	0	0	0	hsa-miR-873-3p	0.0073	0.0511	0.2749	-0.09	-0.11	N/A
KHDRBS2	ENST00000281156.4	KH domain containing, RNA binding, signal transduction associated 2	5	1	0	0	1	0	hsa-miR-873-3p	0.0012	0.009	0.0627	-0.09	-0.09	N/A
SMIM3	ENST00000526627.1	small integral membrane protein 3	3180	1	0	0	1	0	hsa-miR-873-3p	0.0008	0.0062	0.0443	-0.09	-0.09	N/A
DKFZP779L1853	ENST00000595310.1		5	2	0	1	1	0	hsa-miR-873-3p	0.0135	0.0943	0.5147	-0.09	-0.09	N/A
PEF1	ENST00000373703.4	penta-EF-hand domain containing 1	1094	1	0	1	0	0	hsa-miR-873-3p	0.0094	0.0655	0.341	-0.09	-0.09	N/A
ARL13B	ENST00000535334.1	ADP-ribosylation factor-like 13B	23	1	0	0	1	0	hsa-miR-873-3p	0.0027	0.0193	0.1271	-0.09	-0.09	N/A
RNF144A	ENST00000320892.6	ring finger protein 144A	124	1	1	0	0	1	hsa-miR-873-3p	0.018	0.1229	0.5989	-0.09	-0.1	N/A
FAM149A	ENST00000227065.4	family with sequence similarity 149, member A	7	1	0	0	1	0	hsa-miR-873-3p	0.0027	0.0198	0.1258	-0.09	-0.12	N/A
SMOC2	ENST00000356284.2	SPARC related modular calcium binding 2	5	1	0	1	0	0	hsa-miR-873-3p	0.0161	0.1086	0.4885	-0.09	-0.09	N/A
TET2	ENST00000545826.1	tet methylcytosine dioxygenase 2	558	2	1	0	1	2	hsa-miR-873-3p	0.016	0.1141	0.6902	-0.09	-0.09	N/A
ABCD4	ENST00000356924.4	ATP-binding cassette, sub-family D (ALD), member 4	134	1	0	1	0	0	hsa-miR-873-3p	0.0106	0.0735	0.3696	-0.09	-0.09	N/A
SIAH3	ENST00000400405.2	siah E3 ubiquitin protein ligase family member 3	5	2	0	0	2	1	hsa-miR-873-3p	0.0118	0.0852	0.5468	-0.09	-0.09	N/A
LYZ	ENST00000261267.2	lysozyme	255	1	0	1	0	0	hsa-miR-873-3p	0.0057	0.0404	0.2372	-0.09	-0.09	N/A
PGD	ENST00000270776.8	phosphogluconate dehydrogenase	2008	1	0	0	1	0	hsa-miR-873-3p	0.0029	0.0211	0.1373	-0.09	-0.09	N/A
CHI3L1	ENST00000255409.3	chitinase 3-like 1 (cartilage glycoprotein-39)	16	1	0	1	0	0	hsa-miR-873-3p	0.0143	0.0974	0.454	-0.09	-0.09	N/A
CSF1	ENST00000329608.6	colony stimulating factor 1 (macrophage)	290	1	0	1	0	0	hsa-miR-873-3p	0.019	0.1277	0.5808	-0.09	-0.09	N/A
CTSB	ENST00000353047.6	cathepsin B	23628	1	0	1	0	0	hsa-miR-873-3p	0.0083	0.058	0.315	-0.09	-0.09	N/A
GPR27	ENST00000304411.2	G protein-coupled receptor 27	781	1	0	0	1	0	hsa-miR-873-3p	0.003	0.0216	0.1431	-0.09	-0.09	N/A
ADPRHL1	ENST00000356501.4	ADP-ribosylhydrolase like 1	161	1	0	1	0	0	hsa-miR-873-3p	0.0102	0.0708	0.3602	-0.09	-0.09	N/A
POT1	ENST00000357628.3	protection of telomeres 1	142	1	0	0	1	1	hsa-miR-873-3p	0.0047	0.0336	0.1947	-0.09	-0.13	N/A
ZNF347	ENST00000334197.7	zinc finger protein 347	33	2	1	1	0	1	hsa-miR-873-3p	0.0142	0.0992	0.5379	-0.09	-0.11	N/A
CDK5R1	ENST00000313401.3	cyclin-dependent kinase 5, regulatory subunit 1 (p35)	335	2	0	1	1	0	hsa-miR-873-3p	0.014	0.098	0.5369	-0.09	-0.09	N/A
COX10	ENST00000261643.3	cytochrome c oxidase assembly homolog 10 (yeast)	72	2	0	1	1	0	hsa-miR-873-3p	0.016	0.1058	0.4395	-0.09	-0.1	N/A
PDLIM5	ENST00000437932.1	PDZ and LIM domain 5	1002	1	0	0	1	1	hsa-miR-873-3p	0.009	0.0656	0.4303	-0.09	-0.09	N/A
BACH1	ENST00000286800.3	BTB and CNC homology 1, basic leucine zipper transcription factor 1	273	1	0	1	0	0	hsa-miR-873-3p	0.0128	0.0903	0.501	-0.09	-0.09	N/A
KBTBD8	ENST00000295568.4	kelch repeat and BTB (POZ) domain containing 8	22	1	0	0	1	0	hsa-miR-873-3p	0.0072	0.0509	0.2836	-0.09	-0.09	N/A
SLC27A4	ENST00000300456.4	solute carrier family 27 (fatty acid transporter), member 4	523	1	0	0	1	0	hsa-miR-873-3p	0.0034	0.0246	0.166	-0.09	-0.09	N/A
ZNF624	ENST00000311331.7	zinc finger protein 624	167	1	1	0	0	0	hsa-miR-873-3p	0.0107	0.0739	0.3709	-0.09	-0.09	N/A
GAL3ST3	ENST00000312006.4	galactose-3-O-sulfotransferase 3	5	1	0	1	0	0	hsa-miR-873-3p	0.0065	0.0464	0.2643	-0.09	-0.09	N/A
FAM160A1	ENST00000435205.1	family with sequence similarity 160, member A1	18	1	0	0	1	0	hsa-miR-873-3p	0.002	0.0148	0.0976	-0.09	-0.13	N/A
SIRPB2	ENST00000359801.3	signal-regulatory protein beta 2	5	1	0	1	0	0	hsa-miR-873-3p	0.011	0.0758	0.3774	-0.09	-0.09	N/A
DIXDC1	ENST00000440460.2	DIX domain containing 1	307	1	0	1	0	0	hsa-miR-873-3p	0.0155	0.1079	0.5695	-0.09	-0.09	N/A
METTL20	ENST00000357721.3	methyltransferase like 20	47	3	1	0	2	1	hsa-miR-873-3p	0.0072	0.0506	0.286	-0.09	-0.2	N/A
QPCTL	ENST00000012049.5	glutaminyl-peptide cyclotransferase-like	62	3	0	1	2	3	hsa-miR-873-3p	0.0197	0.1385	0.7974	-0.09	-0.13	N/A
DIDO1	ENST00000266070.4	death inducer-obliterator 1	1279	1	0	1	0	0	hsa-miR-873-3p	0.0139	0.0949	0.4462	-0.09	-0.09	N/A
GRAMD3	ENST00000285689.3	GRAM domain containing 3	232	1	0	0	1	0	hsa-miR-873-3p	0.0032	0.0234	0.1654	-0.09	-0.09	N/A
USP6NL	ENST00000609104.1	USP6 N-terminal like	183	1	1	0	0	1	hsa-miR-873-3p	0.0065	0.0464	0.271	-0.09	-0.12	N/A
MTCH2	ENST00000302503.3	mitochondrial carrier 2	4079	1	0	0	1	0	hsa-miR-873-3p	0.0032	0.0232	0.1634	-0.09	-0.12	N/A
SP6	ENST00000342234.2	Sp6 transcription factor	5	1	0	0	1	1	hsa-miR-873-3p	0.0057	0.0413	0.2731	-0.09	-0.09	N/A
SNX15	ENST00000377244.3	sorting nexin 15	341	1	0	1	0	1	hsa-miR-873-3p	0.013	0.0901	0.4722	-0.09	-0.09	N/A
MEX3C	ENST00000592416.1	mex-3 RNA binding family member C	5	1	0	0	1	0	hsa-miR-873-3p	0.0069	0.0503	0.3369	-0.09	-0.09	N/A
CPLX3	ENST00000395018.4	complexin 3	5	1	0	1	0	0	hsa-miR-873-3p	0.0086	0.06	0.3207	-0.09	-0.09	N/A
ENAM	ENST00000396073.3	enamelin	5	1	0	0	1	1	hsa-miR-873-3p	0.0088	0.0637	0.3954	-0.09	-0.09	N/A
NDRG4	ENST00000258187.5	NDRG family member 4	68	1	0	1	0	0	hsa-miR-873-3p	0.0292	0.185	0.6955	-0.09	-0.09	N/A
TICRR	ENST00000268138.7	TOPBP1-interacting checkpoint and replication regulator	314	1	0	1	0	0	hsa-miR-873-3p	0.0203	0.1413	0.7669	-0.09	-0.09	N/A
FNBP1	ENST00000355681.3	formin binding protein 1	165	2	0	0	2	1	hsa-miR-873-3p	0.0039	0.0288	0.1976	-0.09	-0.1	N/A
GPR4	ENST00000323040.4	G protein-coupled receptor 4	5	1	0	0	1	0	hsa-miR-873-3p	0.0016	0.0115	0.0816	-0.09	-0.09	N/A
GAS7	ENST00000437099.2	growth arrest-specific 7	186	1	1	0	0	1	hsa-miR-873-3p	0.0157	0.1113	0.644	-0.09	-0.09	N/A
SLC1A2	ENST00000278379.3	solute carrier family 1 (glial high affinity glutamate transporter), member 2	5	1	0	0	1	1	hsa-miR-873-3p	0.0123	0.0893	0.5935	-0.09	-0.09	N/A
UBE2D4	ENST00000222402.3	ubiquitin-conjugating enzyme E2D 4 (putative)	20	2	0	1	1	0	hsa-miR-873-3p	0.015	0.1038	0.5274	-0.09	-0.09	N/A
CEP57	ENST00000325542.5	centrosomal protein 57kDa	289	1	0	0	1	0	hsa-miR-873-3p	0.0053	0.0383	0.2523	-0.09	-0.09	N/A
TLR5	ENST00000540964.1	toll-like receptor 5	5	1	0	1	0	0	hsa-miR-873-3p	0.0098	0.0693	0.4044	-0.09	-0.09	N/A
PNMAL2	ENST00000599531.1	paraneoplastic Ma antigen family-like 2	10	1	0	1	0	0	hsa-miR-873-3p	0.0228	0.1481	0.5812	-0.09	-0.09	N/A
EMCN	ENST00000296420.4	endomucin	5	1	0	0	1	0	hsa-miR-873-3p	0.0072	0.0526	0.3464	-0.09	-0.09	N/A
ABCB10	ENST00000344517.4	ATP-binding cassette, sub-family B (MDR/TAP), member 10	53	1	0	0	1	0	hsa-miR-873-3p	0.0047	0.0337	0.2054	-0.09	-0.09	N/A
RBMX2	ENST00000305536.6	RNA binding motif protein, X-linked 2	139	2	0	1	1	0	hsa-miR-873-3p	0.0073	0.05	0.2414	-0.09	-0.17	N/A
ZNF45	ENST00000269973.5	zinc finger protein 45	359	1	0	0	1	0	hsa-miR-873-3p	0.0021	0.0153	0.1051	-0.09	-0.09	N/A
AC012360.2	ENST00000595531.1	LOC644617 protein; Uncharacterized protein	430	1	0	0	1	0	hsa-miR-873-3p	0.0026	0.0187	0.1296	-0.09	-0.1	N/A
CEP104	ENST00000378230.3	centrosomal protein 104kDa	73	2	0	1	1	0	hsa-miR-873-3p	0.0288	0.1793	0.6451	-0.09	-0.1	N/A
SDR16C5	ENST00000396721.2	short chain dehydrogenase/reductase family 16C, member 5	5	1	1	0	0	0	hsa-miR-873-3p	0.0068	0.0482	0.2723	-0.09	-0.09	N/A
CTAGE1	ENST00000391403.2	cutaneous T-cell lymphoma-associated antigen 1	5	1	0	1	0	0	hsa-miR-873-3p	0.0113	0.0783	0.4035	-0.09	-0.09	N/A
CHRNB2	ENST00000368476.3	cholinergic receptor, nicotinic, beta 2 (neuronal)	16	2	0	1	1	1	hsa-miR-873-3p	0.0195	0.1334	0.6624	-0.09	-0.09	N/A
PLXNC1	ENST00000258526.4	plexin C1	47	1	0	1	0	0	hsa-miR-873-3p	0.0195	0.1294	0.5591	-0.09	-0.09	N/A
PIANP	ENST00000534837.1	PILR alpha associated neural protein	8	1	0	1	0	0	hsa-miR-873-3p	0.0074	0.0528	0.3164	-0.09	-0.09	N/A
CPNE5	ENST00000244751.2	copine V	13	1	0	1	0	0	hsa-miR-873-3p	0.0112	0.0788	0.4326	-0.09	-0.09	N/A
ADAMTSL4	ENST00000369038.2	ADAMTS-like 4	115	1	1	0	0	0	hsa-miR-873-3p	0.0081	0.0581	0.3542	-0.09	-0.09	N/A
ETV4	ENST00000319349.5	ets variant 4	206	1	0	0	1	0	hsa-miR-873-3p	0.0022	0.0161	0.1078	-0.09	-0.09	N/A
FOXE1	ENST00000375123.3	forkhead box E1 (thyroid transcription factor 2)	497	1	0	1	0	0	hsa-miR-873-3p	0.0169	0.113	0.4872	-0.09	-0.09	N/A
TBC1D14	ENST00000448507.1	TBC1 domain family, member 14	1583	1	0	1	0	0	hsa-miR-873-3p	0.0152	0.1056	0.5596	-0.09	-0.09	N/A
CSRNP3	ENST00000314499.7	cysteine-serine-rich nuclear protein 3	24	1	0	1	0	1	hsa-miR-873-3p	0.0226	0.1571	0.8382	-0.09	-0.09	N/A
MIDN	ENST00000591446.2	midnolin	621	1	0	1	0	0	hsa-miR-873-3p	0.0096	0.0675	0.3629	-0.09	-0.09	N/A
C16orf62	ENST00000543152.1	chromosome 16 open reading frame 62	599	1	0	1	0	0	hsa-miR-873-3p	0.007	0.0493	0.2628	-0.09	-0.12	N/A
TBC1D23	ENST00000344949.5	TBC1 domain family, member 23	238	1	0	0	1	0	hsa-miR-873-3p	0.005	0.0364	0.2408	-0.08	-0.09	N/A
CPLX2	ENST00000359546.4	complexin 2	5	1	0	0	1	0	hsa-miR-873-3p	0.0026	0.0189	0.1291	-0.08	-0.08	N/A
KLLN	ENST00000445946.3	killin, p53-regulated DNA replication inhibitor	5	2	0	0	2	0	hsa-miR-873-3p	0.0061	0.0441	0.2835	-0.08	-0.08	N/A
ITGB6	ENST00000283249.2	integrin, beta 6	5	1	0	0	1	0	hsa-miR-873-3p	0.0045	0.0326	0.2234	-0.08	-0.08	N/A
PPTC7	ENST00000354300.3	PTC7 protein phosphatase homolog (S. cerevisiae)	817	1	0	1	0	2	hsa-miR-873-3p	0.0065	0.0466	0.2718	-0.08	-0.08	N/A
RGS17	ENST00000367225.2	regulator of G-protein signaling 17	11	1	0	1	0	1	hsa-miR-873-3p	0.0339	0.2109	0.7501	-0.08	-0.09	N/A
SLCO2A1	ENST00000310926.4	solute carrier organic anion transporter family, member 2A1	113	1	0	1	0	0	hsa-miR-873-3p	0.0174	0.1178	0.5509	-0.08	-0.09	N/A
RAB21	ENST00000261263.3	RAB21, member RAS oncogene family	1823	1	0	0	1	2	hsa-miR-873-3p	0.0053	0.0377	0.2198	-0.08	-0.13	N/A
ZNF440	ENST00000304060.5	zinc finger protein 440	12	2	0	2	0	0	hsa-miR-873-3p	0.01	0.0696	0.3657	-0.08	-0.2	N/A
USP46	ENST00000441222.3	ubiquitin specific peptidase 46	180	2	0	0	2	1	hsa-miR-873-3p	0.0026	0.0194	0.1354	-0.08	-0.09	N/A
ALG10	ENST00000266483.2	ALG10, alpha-1,2-glucosyltransferase	13	1	0	1	0	0	hsa-miR-873-3p	0.0096	0.0659	0.3294	-0.08	-0.14	N/A
ANO3	ENST00000256737.3	anoctamin 3	5	1	1	0	0	1	hsa-miR-873-3p	0.0254	0.1691	0.7668	-0.08	-0.08	N/A
RNASE13	ENST00000382951.3	ribonuclease, RNase A family, 13 (non-active)	5	1	0	0	1	0	hsa-miR-873-3p	0.0026	0.0189	0.1308	-0.08	-0.08	N/A
CCR5	ENST00000292303.4	chemokine (C-C motif) receptor 5 (gene/pseudogene)	5	1	1	0	0	0	hsa-miR-873-3p	0.0106	0.0735	0.3789	-0.08	-0.08	N/A
ITGBL1	ENST00000545560.2	integrin, beta-like 1 (with EGF-like repeat domains)	106	1	0	0	1	0	hsa-miR-873-3p	0.0075	0.0542	0.3533	-0.08	-0.08	N/A
STOX2	ENST00000308497.4	storkhead box 2	379	1	1	0	0	0	hsa-miR-873-3p	0.0118	0.0853	0.5515	-0.08	-0.08	N/A
BTN3A3	ENST00000244519.2	butyrophilin, subfamily 3, member A3	16	1	0	1	0	0	hsa-miR-873-3p	0.0171	0.1142	0.4878	-0.08	-0.08	N/A
C12orf66	ENST00000544871.1	chromosome 12 open reading frame 66	98	1	0	0	1	0	hsa-miR-873-3p	0.0052	0.0378	0.2566	-0.08	-0.13	N/A
MINPP1	ENST00000371994.4	multiple inositol-polyphosphate phosphatase 1	1079	1	0	0	1	1	hsa-miR-873-3p	0.0027	0.0196	0.1383	-0.08	-0.08	N/A
PLIN3	ENST00000221957.4	perilipin 3	1241	1	0	0	1	0	hsa-miR-873-3p	0.0017	0.0126	0.086	-0.08	-0.08	N/A
CEBPA	ENST00000498907.2	CCAAT/enhancer binding protein (C/EBP), alpha	12449	1	0	0	1	0	hsa-miR-873-3p	0.0015	0.0111	0.0765	-0.08	-0.09	N/A
IFIT5	ENST00000371795.4	interferon-induced protein with tetratricopeptide repeats 5	160	1	0	0	1	0	hsa-miR-873-3p	0.0008	0.0059	0.0411	-0.08	-0.12	N/A
ZNF460	ENST00000360338.3	zinc finger protein 460	164	2	0	0	2	6	hsa-miR-873-3p	0.0308	0.2233	1.4522	-0.08	-0.09	N/A
KPNA6	ENST00000373625.3	karyopherin alpha 6 (importin alpha 7)	272	1	0	1	0	0	hsa-miR-873-3p	0.0109	0.0775	0.4524	-0.08	-0.1	N/A
PDPN	ENST00000294489.6	podoplanin	264	1	0	0	1	0	hsa-miR-873-3p	0.0046	0.0328	0.2046	-0.08	-0.15	N/A
MAX	ENST00000284165.6	MYC associated factor X	51	2	0	1	1	1	hsa-miR-873-3p	0.0109	0.0786	0.5007	-0.08	-0.14	N/A
UBE2E3	ENST00000410062.4	ubiquitin-conjugating enzyme E2E 3	15	1	0	0	1	0	hsa-miR-873-3p	0.0031	0.0227	0.1536	-0.08	-0.13	N/A
KCNAB3	ENST00000303790.2	potassium voltage-gated channel, shaker-related subfamily, beta member 3	35	1	1	0	0	0	hsa-miR-873-3p	0.0052	0.0372	0.218	-0.08	-0.2	N/A
ARHGAP29	ENST00000260526.6	Rho GTPase activating protein 29	451	2	0	0	2	2	hsa-miR-873-3p	0.0112	0.0809	0.5112	-0.08	-0.09	N/A
C9orf66	ENST00000382387.2	chromosome 9 open reading frame 66	13	1	0	1	0	1	hsa-miR-873-3p	0.0061	0.043	0.2533	-0.08	-0.22	N/A
PUM1	ENST00000424085.2	pumilio RNA-binding family member 1	202	1	0	0	1	0	hsa-miR-873-3p	0.0041	0.0296	0.1862	-0.08	-0.09	N/A
NHLH1	ENST00000302101.5	nescient helix loop helix 1	5	1	0	1	0	0	hsa-miR-873-3p	0.005	0.0361	0.2167	-0.08	-0.08	N/A
AC093802.1	ENST00000407524.1	Uncharacterized protein	5	1	0	1	0	0	hsa-miR-873-3p	0.0062	0.0442	0.2663	-0.08	-0.08	N/A
ERAP2	ENST00000437043.3	endoplasmic reticulum aminopeptidase 2	19	1	0	0	1	0	hsa-miR-873-3p	0.0043	0.031	0.2025	-0.08	-0.08	N/A
RNF165	ENST00000269439.7	ring finger protein 165	18	3	1	0	2	0	hsa-miR-873-3p	0.0178	0.124	0.6738	-0.08	-0.08	N/A
SLC26A2	ENST00000286298.4	solute carrier family 26 (anion exchanger), member 2	748	1	1	0	0	0	hsa-miR-873-3p	0.0169	0.1195	0.6918	-0.08	-0.08	N/A
UBFD1	ENST00000395878.3	ubiquitin family domain containing 1	6826	1	0	1	0	1	hsa-miR-873-3p	0.0157	0.1096	0.6019	-0.08	-0.08	N/A
NID1	ENST00000366595.3	nidogen 1	303	1	0	0	1	3	hsa-miR-873-3p	0.0153	0.1097	0.6659	-0.08	-0.09	N/A
L2HGDH	ENST00000267436.4	L-2-hydroxyglutarate dehydrogenase	893	1	0	1	0	0	hsa-miR-873-3p	0.0065	0.0464	0.289	-0.08	-0.09	N/A
MGAT5	ENST00000409645.1	mannosyl (alpha-1,6-)-glycoprotein beta-1,6-N-acetyl-glucosaminyltransferase	1627	2	0	1	1	0	hsa-miR-873-3p	0.0131	0.093	0.5347	-0.08	-0.08	N/A
CXADR	ENST00000356275.6	coxsackie virus and adenovirus receptor	56	2	0	1	1	1	hsa-miR-873-3p	0.015	0.1047	0.5651	-0.08	-0.08	N/A
SIX5	ENST00000560168.1	SIX homeobox 5	47	1	0	1	0	0	hsa-miR-873-3p	0.0127	0.0869	0.4127	-0.08	-0.08	N/A
TTC30B	ENST00000408939.3	tetratricopeptide repeat domain 30B	63	2	0	0	2	0	hsa-miR-873-3p	0.0036	0.0265	0.1801	-0.08	-0.09	N/A
PPM1H	ENST00000228705.6	protein phosphatase, Mg2+/Mn2+ dependent, 1H	45	1	0	1	0	0	hsa-miR-873-3p	0.0082	0.0581	0.3247	-0.08	-0.08	N/A
TPM3	ENST00000368531.2	tropomyosin 3	669	1	0	0	1	0	hsa-miR-873-3p	0.0024	0.0176	0.1201	-0.08	-0.08	N/A
GSK3B	ENST00000264235.8	glycogen synthase kinase 3 beta	498	1	0	1	0	0	hsa-miR-873-3p	0.0134	0.088	0.3573	-0.08	-0.12	N/A
MTFMT	ENST00000220058.4	mitochondrial methionyl-tRNA formyltransferase	629	1	0	0	1	0	hsa-miR-873-3p	0.0018	0.0133	0.0936	-0.08	-0.08	N/A
HIST1H2BF	ENST00000359985.1	histone cluster 1, H2bf	16	1	0	1	0	0	hsa-miR-873-3p	0.0046	0.0329	0.2017	-0.08	-0.12	N/A
TESC	ENST00000335209.7	tescalcin	22	1	0	1	0	0	hsa-miR-873-3p	0.0069	0.048	0.2428	-0.08	-0.14	N/A
TMC7	ENST00000421369.3	transmembrane channel-like 7	54	1	1	0	0	0	hsa-miR-873-3p	0.0038	0.0272	0.1596	-0.08	-0.15	N/A
DTYMK	ENST00000305784.2	deoxythymidylate kinase (thymidylate kinase)	257	1	0	1	0	0	hsa-miR-873-3p	0.0076	0.0537	0.2955	-0.08	-0.08	N/A
MYO1H	ENST00000310903.5	myosin IH	5	1	0	0	1	0	hsa-miR-873-3p	0.0036	0.0262	0.1743	-0.08	-0.08	N/A
ABCA1	ENST00000374736.3	ATP-binding cassette, sub-family A (ABC1), member 1	184	2	1	0	1	0	hsa-miR-873-3p	0.0178	0.1226	0.6282	-0.08	-0.08	N/A
CTNND1	ENST00000524630.1	catenin (cadherin-associated protein), delta 1	743	1	1	0	0	0	hsa-miR-873-3p	0.0113	0.0798	0.4481	-0.08	-0.08	N/A
LUZP2	ENST00000533227.1	leucine zipper protein 2	33	2	0	2	0	1	hsa-miR-873-3p	0.0354	0.2397	1.116	-0.08	-0.08	N/A
FCGR2A	ENST00000271450.6	Fc fragment of IgG, low affinity IIa, receptor (CD32)	5	1	0	0	1	1	hsa-miR-873-3p	0.0059	0.0428	0.2762	-0.08	-0.08	N/A
SLC22A17	ENST00000354772.3	solute carrier family 22, member 17	271	1	0	0	1	0	hsa-miR-873-3p	0.0022	0.0159	0.1068	-0.08	-0.08	N/A
ETNK2	ENST00000367201.3	ethanolamine kinase 2	7	1	0	1	0	0	hsa-miR-873-3p	0.0184	0.1216	0.5093	-0.08	-0.08	N/A
CTDSP2	ENST00000398073.2	CTD (carboxy-terminal domain, RNA polymerase II, polypeptide A) small phosphatase 2	991	1	0	0	1	0	hsa-miR-873-3p	0.0043	0.031	0.1957	-0.08	-0.08	N/A
TRAPPC3	ENST00000373166.3	trafficking protein particle complex 3	470	1	0	1	0	0	hsa-miR-873-3p	0.006	0.0418	0.227	-0.08	-0.16	N/A
ASXL2	ENST00000435504.4	additional sex combs like 2 (Drosophila)	139	2	0	0	2	4	hsa-miR-873-3p	0.0212	0.1526	0.954	-0.08	-0.1	N/A
ZNF529	ENST00000334116.7	zinc finger protein 529	120	2	1	1	0	1	hsa-miR-873-3p	0.0083	0.0595	0.3621	-0.08	-0.27	N/A
DCAF7	ENST00000310827.4	DDB1 and CUL4 associated factor 7	3289	1	1	0	0	0	hsa-miR-873-3p	0.0164	0.1132	0.5781	-0.08	-0.08	N/A
SLC38A7	ENST00000570101.1	solute carrier family 38, member 7	635	3	0	2	1	0	hsa-miR-873-3p	0.0105	0.0746	0.4314	-0.08	-0.1	N/A
FBXO44	ENST00000376770.1	F-box protein 44	161	1	0	1	0	1	hsa-miR-873-3p	0.0063	0.0449	0.2621	-0.08	-0.08	N/A
PCDHGA5	ENST00000518069.1	protocadherin gamma subfamily A, 5	145	1	0	0	1	0	hsa-miR-873-3p	0.0055	0.0402	0.2679	-0.08	-0.08	N/A
PCDHGB7	ENST00000398594.2	protocadherin gamma subfamily B, 7	145	1	0	0	1	0	hsa-miR-873-3p	0.0046	0.0331	0.2181	-0.08	-0.08	N/A
PCDHGB1	ENST00000523390.1	protocadherin gamma subfamily B, 1	145	1	0	0	1	0	hsa-miR-873-3p	0.0048	0.0352	0.2336	-0.08	-0.08	N/A
TAF1	ENST00000373790.4	TAF1 RNA polymerase II, TATA box binding protein (TBP)-associated factor, 250kDa	61	1	1	0	0	1	hsa-miR-873-3p	0.0083	0.0591	0.3589	-0.08	-0.08	N/A
DLL3	ENST00000205143.4	delta-like 3 (Drosophila)	36	1	0	1	0	0	hsa-miR-873-3p	0.007	0.0494	0.283	-0.08	-0.08	N/A
PCDHGB3	ENST00000576222.1	protocadherin gamma subfamily B, 3	145	1	0	0	1	0	hsa-miR-873-3p	0.0045	0.0325	0.2139	-0.08	-0.08	N/A
ZNF805	ENST00000535550.1	zinc finger protein 805	58	2	0	2	0	0	hsa-miR-873-3p	0.0132	0.0924	0.5137	-0.08	-0.16	N/A
PCDHGB2	ENST00000522605.1	protocadherin gamma subfamily B, 2	145	1	0	0	1	0	hsa-miR-873-3p	0.0047	0.0339	0.2242	-0.08	-0.08	N/A
CXorf23	ENST00000379687.3	chromosome X open reading frame 23	30	1	0	0	1	0	hsa-miR-873-3p	0.0041	0.0298	0.1986	-0.08	-0.08	N/A
CUX1	ENST00000437600.4	cut-like homeobox 1	1205	1	0	1	0	1	hsa-miR-873-3p	0.0074	0.0533	0.3227	-0.08	-0.08	N/A
PCDHGA1	ENST00000517417.1	protocadherin gamma subfamily A, 1	145	1	0	0	1	0	hsa-miR-873-3p	0.0053	0.0386	0.2585	-0.08	-0.08	N/A
PCDHGA4	ENST00000571252.1	protocadherin gamma subfamily A, 4	145	1	0	0	1	0	hsa-miR-873-3p	0.0053	0.0385	0.2568	-0.08	-0.08	N/A
MOSPD2	ENST00000380492.3	motile sperm domain containing 2	76	1	0	0	1	1	hsa-miR-873-3p	0.0088	0.0631	0.3933	-0.08	-0.08	N/A
ZNF605	ENST00000360187.4	zinc finger protein 605	147	1	0	0	1	0	hsa-miR-873-3p	0.0049	0.0356	0.2373	-0.08	-0.08	N/A
C6orf222	ENST00000437635.2	chromosome 6 open reading frame 222	5	1	0	0	1	0	hsa-miR-873-3p	0.0018	0.013	0.0919	-0.08	-0.08	N/A
PCDHGB6	ENST00000520790.1	protocadherin gamma subfamily B, 6	145	1	0	0	1	0	hsa-miR-873-3p	0.0045	0.0325	0.2139	-0.08	-0.08	N/A
PCDHGB4	ENST00000519479.1	protocadherin gamma subfamily B, 4	145	1	0	0	1	0	hsa-miR-873-3p	0.0064	0.0467	0.3139	-0.08	-0.08	N/A
ARRDC2	ENST00000379656.3	arrestin domain containing 2	144	2	0	0	2	0	hsa-miR-873-3p	0.0035	0.0256	0.1746	-0.08	-0.09	N/A
TNFRSF9	ENST00000377507.3	tumor necrosis factor receptor superfamily, member 9	16	2	0	2	0	0	hsa-miR-873-3p	0.0232	0.1588	0.7829	-0.08	-0.11	N/A
ZBTB6	ENST00000373659.3	zinc finger and BTB domain containing 6	55	1	0	0	1	1	hsa-miR-873-3p	0.0042	0.0306	0.2008	-0.08	-0.1	N/A
MOCS3	ENST00000244051.1	molybdenum cofactor synthesis 3	271	2	1	0	1	1	hsa-miR-873-3p	0.0038	0.0263	0.1361	-0.08	-0.18	N/A
SMIM13	ENST00000416247.2	small integral membrane protein 13	199	2	1	1	0	0	hsa-miR-873-3p	0.006	0.0428	0.2458	-0.08	-0.19	N/A
PGAP1	ENST00000354764.4	post-GPI attachment to proteins 1	106	5	1	2	2	1	hsa-miR-873-3p	0.0119	0.0853	0.5183	-0.08	-0.14	N/A
ZDHHC20	ENST00000320220.9	zinc finger, DHHC-type containing 20	1486	1	0	1	0	1	hsa-miR-873-3p	0.0088	0.063	0.3834	-0.08	-0.08	N/A
PALLD	ENST00000261509.6	palladin, cytoskeletal associated protein	4423	1	0	1	0	0	hsa-miR-873-3p	0.0082	0.0585	0.3506	-0.08	-0.08	N/A
ZNF550	ENST00000325134.5	zinc finger protein 550	76	1	0	1	0	0	hsa-miR-873-3p	0.0053	0.0378	0.2324	-0.08	-0.18	N/A
PCDHGA7	ENST00000518325.1	protocadherin gamma subfamily A, 7	145	1	0	0	1	0	hsa-miR-873-3p	0.0072	0.052	0.3456	-0.08	-0.08	N/A
LZTS3	ENST00000329152.3	Homo sapiens leucine zipper, putative tumor suppressor family member 3 (LZTS3), transcript variant 2, mRNA.	78	2	0	1	1	0	hsa-miR-873-3p	0.0067	0.0489	0.3147	-0.08	-0.08	N/A
PCDHGA9	ENST00000573521.1	protocadherin gamma subfamily A, 9	145	1	0	0	1	0	hsa-miR-873-3p	0.005	0.0361	0.2399	-0.08	-0.08	N/A
PCDHGA10	ENST00000398610.2	protocadherin gamma subfamily A, 10	145	1	0	0	1	0	hsa-miR-873-3p	0.007	0.0507	0.342	-0.08	-0.08	N/A
PCDHGA12	ENST00000252085.3	protocadherin gamma subfamily A, 12	145	1	0	0	1	0	hsa-miR-873-3p	0.0048	0.0349	0.2314	-0.08	-0.08	N/A
PCDHGA3	ENST00000253812.6	protocadherin gamma subfamily A, 3	145	1	0	0	1	0	hsa-miR-873-3p	0.0045	0.0325	0.2139	-0.08	-0.08	N/A
PCDHGA8	ENST00000398604.2	protocadherin gamma subfamily A, 8	145	1	0	0	1	0	hsa-miR-873-3p	0.005	0.0367	0.2442	-0.08	-0.08	N/A
PCDHGC4	ENST00000306593.1	protocadherin gamma subfamily C, 4	145	1	0	0	1	0	hsa-miR-873-3p	0.0057	0.0416	0.2782	-0.08	-0.08	N/A
UNC45B	ENST00000268876.5	unc-45 homolog B (C. elegans)	5	1	0	0	1	0	hsa-miR-873-3p	0.0063	0.0461	0.3234	-0.08	-0.08	N/A
B3GNT5	ENST00000326505.3	UDP-GlcNAc:betaGal beta-1,3-N-acetylglucosaminyltransferase 5	57	1	0	1	0	0	hsa-miR-873-3p	0.0104	0.074	0.4242	-0.08	-0.08	N/A
DNAAF3	ENST00000524407.2	dynein, axonemal, assembly factor 3	25	1	0	0	1	0	hsa-miR-873-3p	0.0027	0.0197	0.1329	-0.08	-0.08	N/A
RNF39	ENST00000376751.3	ring finger protein 39	7	1	0	0	1	0	hsa-miR-873-3p	0.0035	0.0253	0.1651	-0.08	-0.08	N/A
PCDHGA2	ENST00000394576.2	protocadherin gamma subfamily A, 2	145	1	0	0	1	0	hsa-miR-873-3p	0.0045	0.0325	0.2139	-0.08	-0.08	N/A
NELFB	ENST00000343053.4	negative elongation factor complex member B	1686	1	0	1	0	0	hsa-miR-873-3p	0.0042	0.0305	0.2056	-0.08	-0.08	N/A
AC110781.3	ENST00000402221.1	Protein LOC100128374	5	1	1	0	0	0	hsa-miR-873-3p	0.0052	0.0373	0.2268	-0.08	-0.08	N/A
PCDHGC5	ENST00000252087.1	protocadherin gamma subfamily C, 5	145	1	0	0	1	0	hsa-miR-873-3p	0.0059	0.0431	0.2869	-0.08	-0.08	N/A
CNOT6L	ENST00000504123.1	CCR4-NOT transcription complex, subunit 6-like	23	1	0	0	1	0	hsa-miR-873-3p	0.0049	0.035	0.2194	-0.08	-0.08	N/A
PCDHGA6	ENST00000517434.1	protocadherin gamma subfamily A, 6	145	1	0	0	1	0	hsa-miR-873-3p	0.007	0.0511	0.3463	-0.08	-0.08	N/A
CPNE8	ENST00000331366.5	copine VIII	343	1	0	1	0	0	hsa-miR-873-3p	0.0075	0.0534	0.3027	-0.08	-0.08	N/A
P2RY8	ENST00000381297.4	purinergic receptor P2Y, G-protein coupled, 8	5	1	0	0	1	1	hsa-miR-873-3p	0.0048	0.0352	0.2364	-0.08	-0.08	N/A
PCDHGC3	ENST00000308177.3	protocadherin gamma subfamily C, 3	145	1	0	0	1	0	hsa-miR-873-3p	0.0074	0.0537	0.3589	-0.08	-0.08	N/A
L3MBTL3	ENST00000529410.1	l(3)mbt-like 3 (Drosophila)	60	1	1	0	0	1	hsa-miR-873-3p	0.0125	0.0882	0.4928	-0.08	-0.1	N/A
TMEM194A	ENST00000379391.3	transmembrane protein 194A	43	1	1	0	0	0	hsa-miR-873-3p	0.0129	0.0889	0.4603	-0.08	-0.13	N/A
MICALCL	ENST00000256186.2	MICAL C-terminal like	62	1	1	0	0	0	hsa-miR-873-3p	0.0103	0.0708	0.352	-0.08	-0.11	N/A
PHF7	ENST00000327906.3	PHD finger protein 7	38	3	0	1	2	2	hsa-miR-873-3p	0.0131	0.0926	0.5399	-0.08	-0.09	N/A
FBXO45	ENST00000311630.6	F-box protein 45	72	2	0	2	0	0	hsa-miR-873-3p	0.0204	0.1391	0.6598	-0.08	-0.09	N/A
MYO5A	ENST00000399231.3	myosin VA (heavy chain 12, myoxin)	573	1	1	0	0	1	hsa-miR-873-3p	0.0182	0.1274	0.7111	-0.08	-0.09	N/A
TOR1AIP2	ENST00000367612.3	torsin A interacting protein 2	569	2	0	1	1	0	hsa-miR-873-3p	0.0102	0.0695	0.3422	-0.08	-0.12	N/A
FBXL17	ENST00000359660.5	F-box and leucine-rich repeat protein 17	182	1	0	0	1	0	hsa-miR-873-3p	0.0021	0.0157	0.1105	-0.08	-0.08	N/A
RGS12	ENST00000538395.1	regulator of G-protein signaling 12	635	1	1	0	0	1	hsa-miR-873-3p	0.0075	0.0543	0.3392	-0.08	-0.08	N/A
CCDC19	ENST00000368099.4	coiled-coil domain containing 19	5	1	0	1	0	0	hsa-miR-873-3p	0.008	0.0559	0.3044	-0.08	-0.08	N/A
PARP11	ENST00000427057.2	poly (ADP-ribose) polymerase family, member 11	75	1	0	0	1	1	hsa-miR-873-3p	0.0039	0.0283	0.197	-0.08	-0.08	N/A
SULT1C2	ENST00000251481.6	sulfotransferase family, cytosolic, 1C, member 2	16	1	1	0	0	1	hsa-miR-873-3p	0.0046	0.0324	0.1746	-0.08	-0.26	N/A
SCRG1	ENST00000296506.3	stimulator of chondrogenesis 1	5	1	0	0	1	0	hsa-miR-873-3p	0.0027	0.0199	0.139	-0.08	-0.08	N/A
IKBKG	ENST00000393549.2	inhibitor of kappa light polypeptide gene enhancer in B-cells, kinase gamma	5	1	0	1	0	1	hsa-miR-873-3p	0.0183	0.1293	0.7473	-0.08	-0.08	N/A
RILP	ENST00000301336.6	Rab interacting lysosomal protein	43	1	0	0	1	0	hsa-miR-873-3p	0.0047	0.0339	0.2197	-0.08	-0.08	N/A
SLC30A2	ENST00000374278.3	solute carrier family 30 (zinc transporter), member 2	5	1	1	0	0	1	hsa-miR-873-3p	0.0124	0.0866	0.4553	-0.08	-0.08	N/A
TGM5	ENST00000220420.5	transglutaminase 5	5	1	0	1	0	0	hsa-miR-873-3p	0.0101	0.0715	0.4103	-0.08	-0.08	N/A
ITGB3	ENST00000559488.1	integrin, beta 3 (platelet glycoprotein IIIa, antigen CD61)	176	2	1	0	1	0	hsa-miR-873-3p	0.013	0.0927	0.5465	-0.08	-0.08	N/A
MAPK6	ENST00000261845.5	mitogen-activated protein kinase 6	24	1	0	1	0	0	hsa-miR-873-3p	0.0042	0.0304	0.1889	-0.08	-0.1	N/A
ABHD5	ENST00000458276.2	abhydrolase domain containing 5	884	1	0	1	0	2	hsa-miR-873-3p	0.005	0.0362	0.2373	-0.08	-0.1	N/A
C19orf25	ENST00000588849.1	chromosome 19 open reading frame 25	498	1	0	0	1	0	hsa-miR-873-3p	0.0033	0.0239	0.168	-0.08	-0.08	N/A
SDAD1	ENST00000356260.5	SDA1 domain containing 1	91	1	0	0	1	0	hsa-miR-873-3p	0.0039	0.0284	0.1954	-0.08	-0.16	N/A
MFAP3L	ENST00000393704.3	microfibrillar-associated protein 3-like	69	1	0	0	1	0	hsa-miR-873-3p	0.0056	0.041	0.2785	-0.08	-0.08	N/A
OPA1	ENST00000392438.3	optic atrophy 1 (autosomal dominant)	962	1	1	0	0	0	hsa-miR-873-3p	0.006	0.0416	0.212	-0.08	-0.16	N/A
TPRG1L	ENST00000378344.2	tumor protein p63 regulated 1-like	203	1	0	0	1	0	hsa-miR-873-3p	0.0055	0.0396	0.2537	-0.08	-0.1	N/A
PRKAR2A	ENST00000265563.8	protein kinase, cAMP-dependent, regulatory, type II, alpha	583	1	0	1	0	0	hsa-miR-873-3p	0.0146	0.1019	0.5446	-0.08	-0.08	N/A
PI15	ENST00000260113.2	peptidase inhibitor 15	12	1	0	0	1	0	hsa-miR-873-3p	0.0077	0.0557	0.368	-0.08	-0.08	N/A
TSPYL5	ENST00000322128.3	TSPY-like 5	20	1	0	0	1	2	hsa-miR-873-3p	0.0075	0.0551	0.3785	-0.08	-0.08	N/A
TDRD10	ENST00000368480.3	tudor domain containing 10	14	1	0	0	1	0	hsa-miR-873-3p	0.0035	0.0255	0.174	-0.08	-0.08	N/A
TNNI1	ENST00000361379.4	troponin I type 1 (skeletal, slow)	5	1	1	0	0	2	hsa-miR-873-3p	0.0119	0.0847	0.5108	-0.08	-0.08	N/A
C6orf100	ENST00000377186.3	chromosome 6 open reading frame 100	112	1	1	0	0	0	hsa-miR-873-3p	0.0012	0.0083	0.0465	-0.08	-0.53	N/A
PCDHGA11	ENST00000398587.2	protocadherin gamma subfamily A, 11	145	1	0	0	1	0	hsa-miR-873-3p	0.0062	0.045	0.3035	-0.08	-0.08	N/A
ARHGEF7	ENST00000426073.2	Rho guanine nucleotide exchange factor (GEF) 7	361	1	0	1	0	0	hsa-miR-873-3p	0.0214	0.1432	0.6551	-0.08	-0.08	N/A
CIITA	ENST00000324288.8	class II, major histocompatibility complex, transactivator	5	3	0	2	1	0	hsa-miR-873-3p	0.0404	0.2723	1.2738	-0.07	-0.07	N/A
REEP6	ENST00000233596.3	receptor accessory protein 6	822	1	0	1	0	0	hsa-miR-873-3p	0.0087	0.0612	0.3461	-0.07	-0.07	N/A
ADAMTS18	ENST00000282849.5	ADAM metallopeptidase with thrombospondin type 1 motif, 18	7	1	0	0	1	1	hsa-miR-873-3p	0.0087	0.0631	0.4194	-0.07	-0.07	N/A
ARHGAP28	ENST00000419673.2	Rho GTPase activating protein 28	31	1	0	0	1	0	hsa-miR-873-3p	0.0034	0.0252	0.174	-0.07	-0.07	N/A
ZNF264	ENST00000263095.6	zinc finger protein 264	412	6	0	2	4	1	hsa-miR-873-3p	0.0326	0.2255	1.2243	-0.07	-0.12	N/A
TRAPPC2	ENST00000453655.2	trafficking protein particle complex 2	589	1	0	0	1	0	hsa-miR-873-3p	0.0035	0.0258	0.181	-0.07	-0.08	N/A
DNAJB14	ENST00000442697.2	DnaJ (Hsp40) homolog, subfamily B, member 14	10	2	0	1	1	1	hsa-miR-873-3p	0.0075	0.053	0.3122	-0.07	-0.15	N/A
NAPEPLD	ENST00000417955.1	N-acyl phosphatidylethanolamine phospholipase D	13	1	1	0	0	1	hsa-miR-873-3p	0.0117	0.0831	0.4903	-0.07	-0.15	N/A
KRT74	ENST00000549343.1	keratin 74	5	1	0	1	0	0	hsa-miR-873-3p	0.0071	0.05	0.28	-0.07	-0.07	N/A
ZFP91	ENST00000316059.6	ZFP91 zinc finger protein	688	2	1	1	0	0	hsa-miR-873-3p	0.0172	0.1218	0.6896	-0.07	-0.07	N/A
HOXD4	ENST00000306324.3	homeobox D4	214	1	0	0	1	0	hsa-miR-873-3p	0.0046	0.0334	0.2194	-0.07	-0.08	N/A
SAYSD1	ENST00000373249.1	SAYSVFN motif domain containing 1	543	1	0	0	1	0	hsa-miR-873-3p	0.0019	0.014	0.0954	-0.07	-0.08	N/A
RHOA	ENST00000454011.2	ras homolog family member A	8507	1	0	1	0	0	hsa-miR-873-3p	0.0043	0.0299	0.1641	-0.07	-0.17	N/A
EXOSC2	ENST00000372358.5	exosome component 2	852	2	1	0	1	0	hsa-miR-873-3p	0.006	0.042	0.2326	-0.07	-0.23	N/A
GATC	ENST00000551765.1	glutamyl-tRNA(Gln) amidotransferase, subunit C	781	1	0	0	1	0	hsa-miR-873-3p	0.0032	0.0236	0.1627	-0.07	-0.1	N/A
USP53	ENST00000450251.1	ubiquitin specific peptidase 53	300	1	1	0	0	0	hsa-miR-873-3p	0.0089	0.0603	0.2771	-0.07	-0.12	N/A
ATP11A	ENST00000487903.1	ATPase, class VI, type 11A	731	1	0	1	0	0	hsa-miR-873-3p	0.0215	0.1398	0.5927	-0.07	-0.1	N/A
SELV	ENST00000335426.4	Selenoprotein V	5	1	0	0	1	0	hsa-miR-873-3p	0.0009	0.0063	0.0456	-0.07	-0.07	N/A
RPH3A	ENST00000415485.3	rabphilin 3A homolog (mouse)	5	1	0	1	0	0	hsa-miR-873-3p	0.0079	0.0556	0.3064	-0.07	-0.07	N/A
GRK7	ENST00000264952.2	G protein-coupled receptor kinase 7	5	1	0	0	1	1	hsa-miR-873-3p	0.003	0.022	0.1529	-0.07	-0.07	N/A
ITGAL	ENST00000356798.6	integrin, alpha L (antigen CD11A (p180), lymphocyte function-associated antigen 1; alpha polypeptide)	340	2	0	1	1	0	hsa-miR-873-3p	0.0113	0.0812	0.5112	-0.07	-0.07	N/A
SGPL1	ENST00000373202.3	sphingosine-1-phosphate lyase 1	105	1	0	0	1	0	hsa-miR-873-3p	0.0042	0.0305	0.207	-0.07	-0.07	N/A
KRTAP5-8	ENST00000398534.3	keratin associated protein 5-8	5	1	0	1	0	0	hsa-miR-873-3p	0.0063	0.045	0.2582	-0.07	-0.07	N/A
ALG10B	ENST00000308742.4	ALG10B, alpha-1,2-glucosyltransferase	471	2	0	1	1	1	hsa-miR-873-3p	0.0195	0.1362	0.7431	-0.07	-0.07	N/A
SLC6A1	ENST00000287766.4	solute carrier family 6 (neurotransmitter transporter), member 1	5	1	0	0	1	2	hsa-miR-873-3p	0.012	0.0854	0.5171	-0.07	-0.07	N/A
ZNF286B	ENST00000285274.5	zinc finger protein 286B	5	1	0	0	1	1	hsa-miR-873-3p	0.0047	0.0344	0.237	-0.07	-0.07	N/A
GABRG2	ENST00000356592.3	gamma-aminobutyric acid (GABA) A receptor, gamma 2	24	1	0	0	1	0	hsa-miR-873-3p	0.0015	0.0113	0.0797	-0.07	-0.07	N/A
ZNF101	ENST00000592502.1	zinc finger protein 101	409	2	1	1	0	1	hsa-miR-873-3p	0.0234	0.1661	0.9615	-0.07	-0.07	N/A
MOB3A	ENST00000357066.3	MOB kinase activator 3A	13	2	0	2	0	1	hsa-miR-873-3p	0.0252	0.1747	0.8966	-0.07	-0.07	N/A
GPLD1	ENST00000230036.1	glycosylphosphatidylinositol specific phospholipase D1	51	2	0	1	1	0	hsa-miR-873-3p	0.0215	0.1426	0.6267	-0.07	-0.12	N/A
RBMS3	ENST00000396583.3	RNA binding motif, single stranded interacting protein 3	56	2	0	1	1	1	hsa-miR-873-3p	0.0064	0.0464	0.2942	-0.07	-0.15	N/A
CHMP5	ENST00000419016.2	charged multivesicular body protein 5	67	1	1	0	0	0	hsa-miR-873-3p	0.003	0.02	0.0886	-0.07	-0.5	N/A
ONECUT1	ENST00000560699.2	one cut homeobox 1	10	2	1	0	1	0	hsa-miR-873-3p	0.0042	0.0304	0.1855	-0.07	-0.15	N/A
FAM43A	ENST00000329759.4	family with sequence similarity 43, member A	287	1	0	0	1	0	hsa-miR-873-3p	0.0057	0.0409	0.2395	-0.07	-0.07	N/A
PSD3	ENST00000327040.8	pleckstrin and Sec7 domain containing 3	133	3	0	2	1	1	hsa-miR-873-3p	0.026	0.1764	0.8687	-0.07	-0.24	N/A
URB2	ENST00000258243.2	URB2 ribosome biogenesis 2 homolog (S. cerevisiae)	383	1	0	0	1	0	hsa-miR-873-3p	0.0049	0.0346	0.1976	-0.07	-0.15	N/A
MYPN	ENST00000358913.5	myopalladin	73	4	1	1	2	0	hsa-miR-873-3p	0.0142	0.0998	0.5699	-0.07	-0.1	N/A
NAA50	ENST00000240922.3	N(alpha)-acetyltransferase 50, NatE catalytic subunit	260	2	1	0	1	2	hsa-miR-873-3p	0.0027	0.0197	0.1297	-0.07	-0.32	N/A
BHLHA15	ENST00000609256.1	basic helix-loop-helix family, member a15	136	1	1	0	0	2	hsa-miR-873-3p	0.0061	0.044	0.2902	-0.07	-0.07	N/A
NFE2L1	ENST00000585291.1	nuclear factor, erythroid 2-like 1	1605	2	0	1	1	0	hsa-miR-873-3p	0.0021	0.0153	0.1026	-0.07	-0.13	N/A
CYP11B1	ENST00000292427.4	cytochrome P450, family 11, subfamily B, polypeptide 1	5	1	0	0	1	1	hsa-miR-873-3p	0.0058	0.0422	0.2681	-0.07	-0.07	N/A
CYP2B6	ENST00000324071.4	cytochrome P450, family 2, subfamily B, polypeptide 6	5	3	1	0	2	0	hsa-miR-873-3p	0.0067	0.0484	0.2952	-0.07	-0.07	N/A
GABRA3	ENST00000370314.4	gamma-aminobutyric acid (GABA) A receptor, alpha 3	55	1	0	0	1	0	hsa-miR-873-3p	0.0069	0.0492	0.2812	-0.07	-0.07	N/A
DEFB132	ENST00000382376.3	defensin, beta 132	5	1	0	0	1	0	hsa-miR-873-3p	0.0026	0.019	0.1255	-0.07	-0.07	N/A
AHRR	ENST00000316418.5	aryl-hydrocarbon receptor repressor	1049	2	0	1	1	0	hsa-miR-873-3p	0.0072	0.0518	0.3249	-0.07	-0.08	N/A
SEC24C	ENST00000345254.4	SEC24 family, member C (S. cerevisiae)	8215	2	0	2	0	0	hsa-miR-873-3p	0.011	0.0792	0.4867	-0.07	-0.07	N/A
HSPA1L	ENST00000375654.4	heat shock 70kDa protein 1-like	20	1	0	0	1	0	hsa-miR-873-3p	0.0006	0.0041	0.0293	-0.07	-0.07	N/A
FAM13B	ENST00000033079.3	family with sequence similarity 13, member B	220	1	0	1	0	0	hsa-miR-873-3p	0.0143	0.0971	0.459	-0.07	-0.09	N/A
DNAJC3	ENST00000602402.1	DnaJ (Hsp40) homolog, subfamily C, member 3	125	1	0	1	0	0	hsa-miR-873-3p	0.012	0.0861	0.5393	-0.07	-0.08	N/A
MEF2A	ENST00000354410.5	myocyte enhancer factor 2A	654	1	0	1	0	0	hsa-miR-873-3p	0.0161	0.1072	0.4693	-0.07	-0.08	N/A
FZR1	ENST00000441788.2	fizzy/cell division cycle 20 related 1 (Drosophila)	273	2	0	1	1	0	hsa-miR-873-3p	0.0089	0.0635	0.3876	-0.07	-0.07	N/A
IFT74	ENST00000380062.5	intraflagellar transport 74 homolog (Chlamydomonas)	246	1	0	0	1	1	hsa-miR-873-3p	0.002	0.0146	0.0988	-0.07	-0.16	N/A
SYTL3	ENST00000367081.3	synaptotagmin-like 3	16	1	0	1	0	2	hsa-miR-873-3p	0.0094	0.0673	0.4011	-0.07	-0.07	N/A
LIN28B	ENST00000345080.4	lin-28 homolog B (C. elegans)	118	1	0	1	0	1	hsa-miR-873-3p	0.0095	0.0684	0.434	-0.07	-0.07	N/A
CERS3	ENST00000284382.4	ceramide synthase 3	5	1	0	1	0	0	hsa-miR-873-3p	0.0086	0.0617	0.3677	-0.07	-0.07	N/A
ANKRD34C	ENST00000421388.2	ankyrin repeat domain 34C	5	1	0	0	1	1	hsa-miR-873-3p	0.0122	0.0886	0.5738	-0.07	-0.07	N/A
FSBP	ENST00000481490.2	fibrinogen silencer binding protein	36	1	0	0	1	0	hsa-miR-873-3p	0.0092	0.0663	0.4161	-0.07	-0.09	N/A
KCNC1	ENST00000379472.3	potassium voltage-gated channel, Shaw-related subfamily, member 1	42	3	1	2	0	1	hsa-miR-873-3p	0.0255	0.1815	1.0723	-0.07	-0.07	N/A
FUT9	ENST00000302103.5	fucosyltransferase 9 (alpha (1,3) fucosyltransferase)	5	3	1	2	0	4	hsa-miR-873-3p	0.0352	0.2521	1.5295	-0.07	-0.07	N/A
DNAJC5	ENST00000360864.4	DnaJ (Hsp40) homolog, subfamily C, member 5	1089	2	0	2	0	0	hsa-miR-873-3p	0.0075	0.0533	0.3067	-0.07	-0.11	N/A
KPNA3	ENST00000261667.3	karyopherin alpha 3 (importin alpha 4)	104	2	0	2	0	0	hsa-miR-873-3p	0.0112	0.079	0.4376	-0.07	-0.1	N/A
YEATS2	ENST00000305135.5	YEATS domain containing 2	499	1	0	1	0	0	hsa-miR-873-3p	0.0141	0.0972	0.4892	-0.07	-0.07	N/A
HSPA5	ENST00000324460.6	heat shock 70kDa protein 5 (glucose-regulated protein, 78kDa)	2715	1	0	1	0	1	hsa-miR-873-3p	0.007	0.0496	0.2961	-0.07	-0.09	N/A
NUGGC	ENST00000413272.2	nuclear GTPase, germinal center associated	10	2	1	1	0	1	hsa-miR-873-3p	0.0111	0.0779	0.425	-0.07	-0.3	N/A
CAPRIN1	ENST00000341394.4	cell cycle associated protein 1	650	2	0	0	2	1	hsa-miR-873-3p	0.0056	0.0407	0.2674	-0.07	-0.19	N/A
SRP9	ENST00000366838.1	signal recognition particle 9kDa	21	1	0	0	1	0	hsa-miR-873-3p	0.0011	0.0078	0.0536	-0.07	-0.1	N/A
STIL	ENST00000360380.3	SCL/TAL1 interrupting locus	344	1	0	0	1	0	hsa-miR-873-3p	0.0062	0.0454	0.3059	-0.07	-0.07	N/A
MAPK8IP2	ENST00000399908.2	mitogen-activated protein kinase 8 interacting protein 2	88	1	0	1	0	0	hsa-miR-873-3p	0.0129	0.0889	0.4354	-0.07	-0.07	N/A
PPAP2B	ENST00000371250.3	phosphatidic acid phosphatase type 2B	81	1	1	0	0	0	hsa-miR-873-3p	0.0024	0.0172	0.1151	-0.07	-0.07	N/A
ACSS1	ENST00000323482.4	acyl-CoA synthetase short-chain family member 1	12	1	0	1	0	0	hsa-miR-873-3p	0.0071	0.0505	0.2986	-0.07	-0.07	N/A
PIK3IP1	ENST00000441972.1	phosphoinositide-3-kinase interacting protein 1	22	1	0	1	0	0	hsa-miR-873-3p	0.0111	0.0768	0.3805	-0.07	-0.07	N/A
SP8	ENST00000418710.2	Sp8 transcription factor	95	2	0	2	0	1	hsa-miR-873-3p	0.015	0.1014	0.4828	-0.07	-0.13	N/A
TSKU	ENST00000333090.4	tsukushi, small leucine rich proteoglycan	293	2	0	1	1	0	hsa-miR-873-3p	0.0041	0.029	0.1666	-0.07	-0.12	N/A
ZNF621	ENST00000339296.5	zinc finger protein 621	39	1	0	1	0	0	hsa-miR-873-3p	0.0202	0.1353	0.623	-0.07	-0.08	N/A
MAP7D2	ENST00000379651.3	MAP7 domain containing 2	490	1	0	0	1	0	hsa-miR-873-3p	0.0053	0.0389	0.2584	-0.07	-0.07	N/A
PPP1R18	ENST00000399199.3	protein phosphatase 1, regulatory subunit 18	265	1	0	1	0	0	hsa-miR-873-3p	0.013	0.0892	0.4341	-0.07	-0.07	N/A
UNG	ENST00000242576.2	uracil-DNA glycosylase	2812	1	0	1	0	0	hsa-miR-873-3p	0.0058	0.0419	0.2634	-0.07	-0.07	N/A
STK40	ENST00000359297.2	serine/threonine kinase 40	214	1	0	0	1	1	hsa-miR-873-3p	0.0092	0.0666	0.4259	-0.07	-0.07	N/A
CTB-186H2.3	ENST00000591669.1	Uncharacterized protein	5	2	0	0	2	0	hsa-miR-873-3p	0.0065	0.0477	0.3349	-0.07	-0.07	N/A
GPR158	ENST00000376351.3	G protein-coupled receptor 158	5	1	1	0	0	0	hsa-miR-873-3p	0.0162	0.1118	0.5675	-0.07	-0.07	N/A
KCNA5	ENST00000252321.3	potassium voltage-gated channel, shaker-related subfamily, member 5	5	1	0	1	0	0	hsa-miR-873-3p	0.0079	0.0566	0.3354	-0.07	-0.07	N/A
C12orf60	ENST00000330828.2	chromosome 12 open reading frame 60	11	1	0	1	0	0	hsa-miR-873-3p	0.0022	0.0163	0.1143	-0.07	-0.07	N/A
C1orf200	ENST00000377320.3	chromosome 1 open reading frame 200	5	1	0	0	1	0	hsa-miR-873-3p	0.0008	0.0058	0.0418	-0.07	-0.07	N/A
VIPR1	ENST00000433647.1	vasoactive intestinal peptide receptor 1	37	1	0	0	1	0	hsa-miR-873-3p	0.0032	0.023	0.1548	-0.07	-0.07	N/A
PTEN	ENST00000371953.3	phosphatase and tensin homolog	118	1	0	0	1	0	hsa-miR-873-3p	0.0024	0.0173	0.1153	-0.07	-0.1	N/A
NUDC	ENST00000321265.5	nudC nuclear distribution protein	27	1	0	1	0	0	hsa-miR-873-3p	0.0024	0.0168	0.0953	-0.07	-0.2	N/A
YME1L1	ENST00000326799.3	YME1-like 1 ATPase	477	1	0	1	0	0	hsa-miR-873-3p	0.0072	0.0515	0.3227	-0.07	-0.09	N/A
AL021546.6	ENST00000551806.1	Glutamyl-tRNA(Gln) amidotransferase subunit C, mitochondrial	781	1	0	0	1	0	hsa-miR-873-3p	0.0032	0.0235	0.1621	-0.07	-0.09	N/A
GZF1	ENST00000338121.5	GDNF-inducible zinc finger protein 1	252	1	0	0	1	0	hsa-miR-873-3p	0.0044	0.0318	0.2115	-0.07	-0.07	N/A
EXOC2	ENST00000230449.4	exocyst complex component 2	192	1	0	1	0	0	hsa-miR-873-3p	0.0129	0.091	0.5013	-0.07	-0.08	N/A
TNFSF4	ENST00000367718.1	tumor necrosis factor (ligand) superfamily, member 4	85	1	0	0	1	0	hsa-miR-873-3p	0.0041	0.0299	0.1913	-0.07	-0.11	N/A
ST7L	ENST00000360743.4	suppression of tumorigenicity 7 like	45	1	1	0	0	0	hsa-miR-873-3p	0.0072	0.0463	0.1728	-0.07	-0.24	N/A
B3GNT9	ENST00000449549.3	UDP-GlcNAc:betaGal beta-1,3-N-acetylglucosaminyltransferase 9	56	1	0	1	0	0	hsa-miR-873-3p	0.0069	0.0485	0.2736	-0.07	-0.07	N/A
THEMIS2	ENST00000373925.1	thymocyte selection associated family member 2	41	1	0	0	1	0	hsa-miR-873-3p	0.0013	0.0094	0.0656	-0.07	-0.07	N/A
ENPP1	ENST00000360971.2	ectonucleotide pyrophosphatase/phosphodiesterase 1	159	1	0	1	0	1	hsa-miR-873-3p	0.0071	0.0504	0.2947	-0.07	-0.08	N/A
C20orf196	ENST00000303142.6	chromosome 20 open reading frame 196	18	1	0	0	1	0	hsa-miR-873-3p	0.0022	0.0161	0.1063	-0.07	-0.09	N/A
PGP	ENST00000333503.7	phosphoglycolate phosphatase	153	1	0	1	0	0	hsa-miR-873-3p	0.0054	0.0384	0.2158	-0.07	-0.11	N/A
HCCS	ENST00000321143.4	holocytochrome c synthase	1615	1	0	1	0	0	hsa-miR-873-3p	0.0046	0.0331	0.2039	-0.07	-0.11	N/A
C12orf4	ENST00000261250.3	chromosome 12 open reading frame 4	37	1	0	1	0	1	hsa-miR-873-3p	0.0051	0.0366	0.2301	-0.07	-0.08	N/A
ATF2	ENST00000487334.2	activating transcription factor 2	123	1	0	0	1	1	hsa-miR-873-3p	0.0043	0.0312	0.2117	-0.07	-0.1	N/A
WDR26	ENST00000414423.2	WD repeat domain 26	1229	1	0	1	0	2	hsa-miR-873-3p	0.0117	0.0824	0.458	-0.07	-0.14	N/A
AQP2	ENST00000199280.3	aquaporin 2 (collecting duct)	5	1	0	0	1	1	hsa-miR-873-3p	0.0047	0.034	0.2317	-0.07	-0.07	N/A
GOLGA6L10	ENST00000439287.4	Putative golgin subfamily A member 6-like protein 10	0	1	0	1	0	0	hsa-miR-873-3p	0.0054	0.0389	0.2418	-0.07	-0.07	N/A
PML	ENST00000565898.1	promyelocytic leukemia	83	1	0	0	1	1	hsa-miR-873-3p	0.0031	0.023	0.163	-0.07	-0.14	N/A
TDGF1	ENST00000296145.5	teratocarcinoma-derived growth factor 1	5	1	0	0	1	1	hsa-miR-873-3p	0.0041	0.0295	0.1928	-0.07	-0.07	N/A
ZRANB1	ENST00000359653.4	zinc finger, RAN-binding domain containing 1	724	1	0	0	1	0	hsa-miR-873-3p	0.0025	0.0179	0.1199	-0.07	-0.07	N/A
GAS6	ENST00000357389.3	growth arrest-specific 6	11013	1	0	1	0	0	hsa-miR-873-3p	0.0063	0.0448	0.2575	-0.07	-0.07	N/A
DENND6A	ENST00000311128.5	DENN/MADD domain containing 6A	139	1	0	1	0	0	hsa-miR-873-3p	0.0105	0.0737	0.4122	-0.07	-0.07	N/A
SSX2IP	ENST00000342203.3	synovial sarcoma, X breakpoint 2 interacting protein	197	1	0	1	0	0	hsa-miR-873-3p	0.0071	0.0497	0.2724	-0.07	-0.12	N/A
FKBP5	ENST00000536438.1	FK506 binding protein 5	32	1	1	0	0	0	hsa-miR-873-3p	0.0077	0.0542	0.3041	-0.07	-0.11	N/A
C5orf54	ENST00000408953.3	chromosome 5 open reading frame 54	15	1	0	0	1	0	hsa-miR-873-3p	0.0013	0.0095	0.0656	-0.07	-0.07	N/A
HMGN5	ENST00000358130.2	high mobility group nucleosome binding domain 5	46	1	0	1	0	0	hsa-miR-873-3p	0.0056	0.0386	0.1895	-0.07	-0.16	N/A
ZNF432	ENST00000594154.1	zinc finger protein 432	151	1	0	0	1	0	hsa-miR-873-3p	0.0031	0.0224	0.152	-0.07	-0.07	N/A
ERGIC1	ENST00000393784.3	endoplasmic reticulum-golgi intermediate compartment (ERGIC) 1	4614	1	0	1	0	1	hsa-miR-873-3p	0.0076	0.0549	0.3413	-0.07	-0.07	N/A
FCAR	ENST00000355524.3	Fc fragment of IgA, receptor for	5	1	0	0	1	0	hsa-miR-873-3p	0.0009	0.007	0.0501	-0.07	-0.07	N/A
KIAA1161	ENST00000297625.7	KIAA1161	18	3	0	1	2	0	hsa-miR-873-3p	0.016	0.1131	0.6464	-0.07	-0.07	N/A
ZNF783	ENST00000434415.1	zinc finger family member 783	88	3	0	1	2	0	hsa-miR-873-3p	0.0076	0.0553	0.3653	-0.07	-0.07	N/A
TRDN	ENST00000398178.3	triadin	5	1	0	0	1	0	hsa-miR-873-3p	0.0041	0.03	0.2057	-0.07	-0.07	N/A
GBP2	ENST00000370466.3	guanylate binding protein 2, interferon-inducible	1309	1	0	1	0	5	hsa-miR-873-3p	0.0319	0.2236	1.2249	-0.07	-0.07	N/A
FBXO18	ENST00000362091.4	F-box protein, helicase, 18	390	1	0	1	0	0	hsa-miR-873-3p	0.0069	0.0494	0.2957	-0.07	-0.07	N/A
PIAS4	ENST00000262971.2	protein inhibitor of activated STAT, 4	521	1	1	0	0	0	hsa-miR-873-3p	0.0053	0.0379	0.2306	-0.07	-0.07	N/A
BEND4	ENST00000504360.1	BEN domain containing 4	187	1	0	1	0	1	hsa-miR-873-3p	0.0086	0.0621	0.3885	-0.06	-0.07	N/A
MME	ENST00000460393.1	membrane metallo-endopeptidase	37	1	1	0	0	0	hsa-miR-873-3p	0.0025	0.0178	0.0958	-0.06	-0.25	N/A
RNF152	ENST00000312828.3	ring finger protein 152	57	1	0	1	0	2	hsa-miR-873-3p	0.0105	0.0745	0.4426	-0.06	-0.09	N/A
SPTBN2	ENST00000529997.1	spectrin, beta, non-erythrocytic 2	910	3	1	0	2	0	hsa-miR-873-3p	0.0143	0.1035	0.6726	-0.06	-0.08	N/A
NFATC2IP	ENST00000320805.4	nuclear factor of activated T-cells, cytoplasmic, calcineurin-dependent 2 interacting protein	754	1	1	0	0	0	hsa-miR-873-3p	0.0067	0.0478	0.2948	-0.06	-0.08	N/A
HDAC4	ENST00000345617.3	histone deacetylase 4	48	1	0	1	0	0	hsa-miR-873-3p	0.0143	0.0955	0.4136	-0.06	-0.08	N/A
NLGN1	ENST00000457714.1	neuroligin 1	36	2	0	1	1	2	hsa-miR-873-3p	0.0146	0.105	0.6595	-0.06	-0.08	N/A
WDR37	ENST00000358220.1	WD repeat domain 37	107	1	0	1	0	1	hsa-miR-873-3p	0.0103	0.0702	0.3396	-0.06	-0.1	N/A
GAREML	ENST00000401533.2	GRB2 associated, regulator of MAPK1-like	496	1	1	0	0	0	hsa-miR-873-3p	0.008	0.0561	0.3056	-0.06	-0.07	N/A
ALDH7A1	ENST00000409134.3	aldehyde dehydrogenase 7 family, member A1	2007	1	1	0	0	0	hsa-miR-873-3p	0.007	0.0494	0.2685	-0.06	-0.07	N/A
KAT7	ENST00000259021.4	K(lysine) acetyltransferase 7	48	4	2	1	1	1	hsa-miR-873-3p	0.0219	0.152	0.8042	-0.06	-0.12	N/A
CHRNA4	ENST00000370263.4	cholinergic receptor, nicotinic, alpha 4 (neuronal)	5	3	0	1	2	1	hsa-miR-873-3p	0.0097	0.0701	0.4449	-0.06	-0.07	N/A
ITGA6	ENST00000375221.2	integrin, alpha 6	1328	1	0	0	1	1	hsa-miR-873-3p	0.006	0.0437	0.289	-0.06	-0.06	N/A
GRIA1	ENST00000285900.5	glutamate receptor, ionotropic, AMPA 1	5	1	0	1	0	0	hsa-miR-873-3p	0.0088	0.0617	0.327	-0.06	-0.06	N/A
ADD3	ENST00000277900.8	adducin 3 (gamma)	537	1	0	0	1	0	hsa-miR-873-3p	0.0045	0.0324	0.2153	-0.06	-0.06	N/A
INO80D	ENST00000403263.1	INO80 complex subunit D	5	1	0	0	1	1	hsa-miR-873-3p	0.0092	0.0671	0.4526	-0.06	-0.06	N/A
SMCHD1	ENST00000320876.6	structural maintenance of chromosomes flexible hinge domain containing 1	270	1	0	0	1	0	hsa-miR-873-3p	0.0057	0.0411	0.27	-0.06	-0.07	N/A
RCAN3	ENST00000374395.4	RCAN family member 3	395	4	0	0	4	0	hsa-miR-873-3p	0.0075	0.0542	0.3603	-0.06	-0.07	N/A
MOCS2	ENST00000450852.3	molybdenum cofactor synthesis 2	100	1	0	0	1	1	hsa-miR-873-3p	0.0025	0.0183	0.1281	-0.06	-0.07	N/A
RNF32	ENST00000311822.8	ring finger protein 32	15	2	1	1	0	0	hsa-miR-873-3p	0.0055	0.0373	0.1737	-0.06	-0.34	N/A
SPIN1	ENST00000375859.3	spindlin 1	686	1	0	1	0	1	hsa-miR-873-3p	0.0108	0.0774	0.4618	-0.06	-0.06	N/A
NUDT16	ENST00000359850.3	nudix (nucleoside diphosphate linked moiety X)-type motif 16	622	2	0	2	0	0	hsa-miR-873-3p	0.011	0.0761	0.3929	-0.06	-0.15	N/A
TRIM67	ENST00000444294.3	tripartite motif containing 67	41	3	1	2	0	1	hsa-miR-873-3p	0.0236	0.1619	0.8037	-0.06	-0.09	N/A
ZNF488	ENST00000494156.1	zinc finger protein 488	61	1	0	0	1	0	hsa-miR-873-3p	0.0033	0.0245	0.1727	-0.06	-0.07	N/A
C1QTNF7	ENST00000429690.1	C1q and tumor necrosis factor related protein 7	5	2	0	0	2	0	hsa-miR-873-3p	0.0049	0.0353	0.2339	-0.06	-0.06	N/A
KCNS1	ENST00000306117.1	potassium voltage-gated channel, delayed-rectifier, subfamily S, member 1	5	1	0	0	1	0	hsa-miR-873-3p	0.0059	0.0425	0.2687	-0.06	-0.06	N/A
LDLRAD2	ENST00000344642.2	low density lipoprotein receptor class A domain containing 2	5	1	1	0	0	0	hsa-miR-873-3p	0.0081	0.058	0.3392	-0.06	-0.06	N/A
KCNQ1	ENST00000155840.5	potassium voltage-gated channel, KQT-like subfamily, member 1	196	1	1	0	0	0	hsa-miR-873-3p	0.0088	0.0621	0.3551	-0.06	-0.06	N/A
PDGFRB	ENST00000261799.4	platelet-derived growth factor receptor, beta polypeptide	320	2	0	1	1	0	hsa-miR-873-3p	0.0174	0.1201	0.6224	-0.06	-0.06	N/A
CD40	ENST00000372276.3	CD40 molecule, TNF receptor superfamily member 5	5	1	0	1	0	0	hsa-miR-873-3p	0.0043	0.0308	0.19	-0.06	-0.06	N/A
PRKACB	ENST00000370689.2	protein kinase, cAMP-dependent, catalytic, beta	344	1	0	0	1	0	hsa-miR-873-3p	0.0032	0.0234	0.1632	-0.06	-0.06	N/A
SLK	ENST00000335753.4	STE20-like kinase	260	1	0	1	0	0	hsa-miR-873-3p	0.008	0.0562	0.3105	-0.06	-0.06	N/A
CLCC1	ENST00000356970.2	chloride channel CLIC-like 1	849	1	0	1	0	1	hsa-miR-873-3p	0.009	0.063	0.3453	-0.06	-0.1	N/A
DDX19A	ENST00000302243.7	DEAD (Asp-Glu-Ala-Asp) box polypeptide 19A	148	4	2	0	2	0	hsa-miR-873-3p	0.0057	0.0405	0.2473	-0.06	-0.35	N/A
OSBPL6	ENST00000190611.4	oxysterol binding protein-like 6	85	1	1	0	0	0	hsa-miR-873-3p	0.0187	0.124	0.5731	-0.06	-0.11	N/A
GSTCD	ENST00000515279.1	glutathione S-transferase, C-terminal domain containing	411	1	0	0	1	0	hsa-miR-873-3p	0.0028	0.0204	0.1371	-0.06	-0.06	N/A
SLC6A5	ENST00000525748.1	solute carrier family 6 (neurotransmitter transporter), member 5	5	1	0	0	1	0	hsa-miR-873-3p	0.0048	0.0351	0.2387	-0.06	-0.06	N/A
AC010441.1	ENST00000600109.1		3180	1	0	0	1	0	hsa-miR-873-3p	0.0008	0.0062	0.0443	-0.06	-0.06	N/A
KMT2C	ENST00000262189.6	lysine (K)-specific methyltransferase 2C	417	1	0	0	1	0	hsa-miR-873-3p	0.0159	0.1157	0.7716	-0.06	-0.06	N/A
ACBD4	ENST00000398322.3	acyl-CoA binding domain containing 4	10	1	0	1	0	0	hsa-miR-873-3p	0.0127	0.0875	0.4304	-0.06	-0.06	N/A
STX3	ENST00000535361.1	syntaxin 3	564	1	0	1	0	1	hsa-miR-873-3p	0.0073	0.0529	0.3405	-0.06	-0.06	N/A
LRRC32	ENST00000260061.5	leucine rich repeat containing 32	10	1	0	1	0	0	hsa-miR-873-3p	0.0048	0.035	0.2264	-0.06	-0.06	N/A
AL031663.2	ENST00000595203.1	CDNA FLJ26875 fis, clone PRS08969; Uncharacterized protein	22	1	0	0	1	0	hsa-miR-873-3p	0.0017	0.0128	0.0872	-0.06	-0.06	N/A
SPINT1	ENST00000344051.4	serine peptidase inhibitor, Kunitz type 1	1591	1	0	0	1	0	hsa-miR-873-3p	0.0025	0.0185	0.1232	-0.06	-0.06	N/A
RPH3AL	ENST00000331302.7	rabphilin 3A-like (without C2 domains)	60	1	0	1	0	0	hsa-miR-873-3p	0.0095	0.0679	0.4036	-0.06	-0.06	N/A
TDG	ENST00000392872.3	thymine-DNA glycosylase	201	1	0	0	1	0	hsa-miR-873-3p	0.0007	0.0053	0.0381	-0.06	-0.06	N/A
CORO7	ENST00000251166.4	coronin 7	113	2	2	0	0	0	hsa-miR-873-3p	0.0129	0.0895	0.4591	-0.06	-0.13	N/A
NEU3	ENST00000532963.1	sialidase 3 (membrane sialidase)	243	2	0	2	0	3	hsa-miR-873-3p	0.029	0.2031	1.1007	-0.06	-0.06	N/A
ETV5	ENST00000306376.5	ets variant 5	1085	1	0	0	1	1	hsa-miR-873-3p	0.006	0.0435	0.2758	-0.06	-0.06	N/A
METTL8	ENST00000375258.4	methyltransferase like 8	124	1	0	0	1	1	hsa-miR-873-3p	0.0082	0.0592	0.3696	-0.06	-0.07	N/A
GAS2L3	ENST00000547754.1	growth arrest-specific 2 like 3	478	1	0	1	0	0	hsa-miR-873-3p	0.0122	0.0877	0.5507	-0.06	-0.06	N/A
PSME4	ENST00000404125.1	proteasome (prosome, macropain) activator subunit 4	146	2	0	0	2	0	hsa-miR-873-3p	0.0041	0.0303	0.2084	-0.06	-0.06	N/A
IDH3G	ENST00000370093.1	isocitrate dehydrogenase 3 (NAD+) gamma	391	1	0	1	0	0	hsa-miR-873-3p	0.0095	0.0663	0.3441	-0.06	-0.06	N/A
CHRNA7	ENST00000306901.3	cholinergic receptor, nicotinic, alpha 7 (neuronal)	5	1	0	1	0	0	hsa-miR-873-3p	0.0228	0.1504	0.6445	-0.06	-0.06	N/A
AK4	ENST00000545314.1	adenylate kinase 4	116	1	0	0	1	2	hsa-miR-873-3p	0.0128	0.0935	0.6293	-0.06	-0.06	N/A
KCTD1	ENST00000579973.1	potassium channel tetramerization domain containing 1	33	1	0	1	0	0	hsa-miR-873-3p	0.0063	0.0444	0.2509	-0.06	-0.15	N/A
RGS20	ENST00000297313.3	regulator of G-protein signaling 20	77	1	1	0	0	0	hsa-miR-873-3p	0.0034	0.0228	0.1046	-0.06	-0.29	N/A
GFM1	ENST00000486715.1	G elongation factor, mitochondrial 1	586	1	0	0	1	0	hsa-miR-873-3p	0.0013	0.0092	0.0629	-0.06	-0.1	N/A
IL1RAP	ENST00000072516.3	interleukin 1 receptor accessory protein	313	1	0	1	0	0	hsa-miR-873-3p	0.0113	0.0805	0.474	-0.06	-0.06	N/A
TNR	ENST00000367674.2	tenascin R	5	3	1	1	1	0	hsa-miR-873-3p	0.0285	0.1979	1.0344	-0.06	-0.06	N/A
RSF1	ENST00000308488.6	remodeling and spacing factor 1	216	2	1	1	0	0	hsa-miR-873-3p	0.0351	0.2275	0.9692	-0.06	-0.07	N/A
CHST11	ENST00000549260.1	carbohydrate (chondroitin 4) sulfotransferase 11	686	1	0	1	0	0	hsa-miR-873-3p	0.0179	0.1235	0.6293	-0.06	-0.07	N/A
RORA	ENST00000335670.6	RAR-related orphan receptor A	102	1	0	1	0	1	hsa-miR-873-3p	0.0236	0.1629	0.8253	-0.06	-0.07	N/A
TRIM68	ENST00000300747.5	tripartite motif containing 68	98	1	0	0	1	0	hsa-miR-873-3p	0.0033	0.0246	0.1762	-0.06	-0.06	N/A
AC137056.1	ENST00000593357.1	Uncharacterized protein; cDNA FLJ34659 fis, clone KIDNE2018863	5	1	0	0	1	0	hsa-miR-873-3p	0.0033	0.0245	0.1736	-0.06	-0.06	N/A
TMEM200A	ENST00000296978.3	transmembrane protein 200A	1609	1	0	0	1	0	hsa-miR-873-3p	0.0037	0.0269	0.1697	-0.06	-0.06	N/A
DGKE	ENST00000284061.3	diacylglycerol kinase, epsilon 64kDa	470	1	0	1	0	0	hsa-miR-873-3p	0.0091	0.0638	0.3533	-0.06	-0.1	N/A
WDFY3	ENST00000322366.6	WD repeat and FYVE domain containing 3	596	1	0	1	0	0	hsa-miR-873-3p	0.0355	0.2226	0.8377	-0.06	-0.06	N/A
SCN4B	ENST00000324727.4	sodium channel, voltage-gated, type IV, beta subunit	13	1	0	1	0	0	hsa-miR-873-3p	0.0137	0.095	0.4882	-0.06	-0.06	N/A
TET3	ENST00000409262.3	tet methylcytosine dioxygenase 3	1437	3	0	3	0	1	hsa-miR-873-3p	0.0151	0.1093	0.7136	-0.06	-0.06	N/A
TK2	ENST00000299697.7	thymidine kinase 2, mitochondrial	439	1	0	1	0	0	hsa-miR-873-3p	0.0149	0.1044	0.5738	-0.06	-0.06	N/A
RAB39A	ENST00000320578.2	RAB39A, member RAS oncogene family	15	2	1	0	1	0	hsa-miR-873-3p	0.0076	0.0545	0.3229	-0.06	-0.09	N/A
RPL12	ENST00000361436.5	ribosomal protein L12	30	1	0	0	1	1	hsa-miR-873-3p	0.0036	0.0257	0.1644	-0.06	-0.11	N/A
SMARCA5	ENST00000283131.3	SWI/SNF related, matrix associated, actin dependent regulator of chromatin, subfamily a, member 5	478	1	0	0	1	0	hsa-miR-873-3p	0.0027	0.0199	0.1375	-0.06	-0.07	N/A
TMED7	ENST00000456936.3	transmembrane emp24 protein transport domain containing 7	1571	3	0	0	3	2	hsa-miR-873-3p	0.0041	0.03	0.1943	-0.06	-0.22	N/A
HOXA2	ENST00000222718.5	homeobox A2	14	1	0	1	0	0	hsa-miR-873-3p	0.0079	0.0543	0.2814	-0.06	-0.13	N/A
KIAA0391	ENST00000534898.4	KIAA0391	822	2	0	0	2	1	hsa-miR-873-3p	0.0024	0.0177	0.1203	-0.06	-0.13	N/A
CLCN6	ENST00000312413.6	chloride channel, voltage-sensitive 6	227	2	0	2	0	0	hsa-miR-873-3p	0.0257	0.1739	0.8095	-0.06	-0.06	N/A
FBXL7	ENST00000504595.1	F-box and leucine-rich repeat protein 7	16	1	0	1	0	0	hsa-miR-873-3p	0.0169	0.1158	0.5734	-0.06	-0.06	N/A
RASGRF1	ENST00000558480.2	Ras protein-specific guanine nucleotide-releasing factor 1	5	1	1	0	0	1	hsa-miR-873-3p	0.0135	0.0953	0.5347	-0.06	-0.06	N/A
PCYT1B	ENST00000379145.1	phosphate cytidylyltransferase 1, choline, beta	5	1	0	1	0	0	hsa-miR-873-3p	0.0172	0.1175	0.5714	-0.06	-0.06	N/A
ASB16	ENST00000293414.1	ankyrin repeat and SOCS box containing 16	14	2	0	1	1	0	hsa-miR-873-3p	0.0123	0.0866	0.4904	-0.06	-0.09	N/A
PROSER2	ENST00000277570.5	proline and serine-rich protein 2	61	2	0	0	2	0	hsa-miR-873-3p	0.0035	0.0255	0.1763	-0.06	-0.07	N/A
KAT6A	ENST00000265713.2	K(lysine) acetyltransferase 6A	21	1	0	0	1	0	hsa-miR-873-3p	0.0055	0.0403	0.272	-0.06	-0.1	N/A
ANO1	ENST00000355303.5	anoctamin 1, calcium activated chloride channel	78	1	0	0	1	1	hsa-miR-873-3p	0.0041	0.03	0.1979	-0.06	-0.11	N/A
URM1	ENST00000372850.1	ubiquitin related modifier 1	345	1	0	1	0	1	hsa-miR-873-3p	0.0084	0.0599	0.3666	-0.06	-0.06	N/A
B3GALTL	ENST00000343307.4	beta 1,3-galactosyltransferase-like	200	1	0	0	1	1	hsa-miR-873-3p	0.0036	0.0261	0.1789	-0.06	-0.1	N/A
REXO1L1	ENST00000379010.2	REX1, RNA exonuclease 1 homolog (S. cerevisiae)-like 1	5	1	0	0	1	0	hsa-miR-873-3p	0.0054	0.0392	0.2516	-0.06	-0.06	N/A
CBX5	ENST00000209875.4	chromobox homolog 5	360	4	0	1	3	1	hsa-miR-873-3p	0.0068	0.0489	0.2988	-0.06	-0.13	N/A
REEP3	ENST00000373758.4	receptor accessory protein 3	1095	1	0	0	1	0	hsa-miR-873-3p	0.0052	0.0374	0.2419	-0.06	-0.07	N/A
PITPNA	ENST00000313486.7	phosphatidylinositol transfer protein, alpha	366	1	0	1	0	2	hsa-miR-873-3p	0.0063	0.0461	0.3048	-0.06	-0.13	N/A
ARPC4	ENST00000397261.3	actin related protein 2/3 complex, subunit 4, 20kDa	2513	1	1	0	0	1	hsa-miR-873-3p	0.0023	0.0167	0.1098	-0.06	-0.18	N/A
C2orf82	ENST00000409533.1	chromosome 2 open reading frame 82	72	1	0	1	0	0	hsa-miR-873-3p	0.006	0.0404	0.1778	-0.06	-0.16	N/A
TMED4	ENST00000457408.2	transmembrane emp24 protein transport domain containing 4	3117	2	0	1	1	1	hsa-miR-873-3p	0.0141	0.0957	0.4363	-0.06	-0.07	N/A
ANO6	ENST00000320560.8	anoctamin 6	2262	1	0	0	1	1	hsa-miR-873-3p	0.0063	0.0463	0.3137	-0.06	-0.06	N/A
VPS41	ENST00000310301.4	vacuolar protein sorting 41 homolog (S. cerevisiae)	163	1	0	1	0	1	hsa-miR-873-3p	0.0134	0.0941	0.5186	-0.06	-0.06	N/A
ZNF286A	ENST00000395894.2	Zinc finger protein 286A	19	1	0	0	1	0	hsa-miR-873-3p	0.0052	0.0384	0.2646	-0.06	-0.06	N/A
SP140L	ENST00000415673.2	SP140 nuclear body protein-like	7	2	0	0	2	1	hsa-miR-873-3p	0.0032	0.0237	0.1682	-0.06	-0.06	N/A
ATE1	ENST00000369043.3	arginyltransferase 1	237	1	0	0	1	1	hsa-miR-873-3p	0.0051	0.0372	0.2491	-0.06	-0.06	N/A
GCNT4	ENST00000322348.4	glucosaminyl (N-acetyl) transferase 4, core 2	19	2	0	1	1	1	hsa-miR-873-3p	0.0067	0.0486	0.3101	-0.06	-0.12	N/A
FTO	ENST00000471389.1	fat mass and obesity associated	240	2	1	0	1	1	hsa-miR-873-3p	0.0081	0.0581	0.3699	-0.06	-0.17	N/A
FRAS1	ENST00000264895.6	Fraser syndrome 1	709	1	1	0	0	0	hsa-miR-873-3p	0.0186	0.1289	0.6773	-0.06	-0.06	N/A
GLB1L3	ENST00000431683.2	galactosidase, beta 1-like 3	7	1	0	0	1	0	hsa-miR-873-3p	0.0016	0.0116	0.0833	-0.06	-0.06	N/A
ZNF841	ENST00000594295.1	zinc finger protein 841	21	1	0	0	1	1	hsa-miR-873-3p	0.0047	0.0342	0.2305	-0.06	-0.06	N/A
CYP11B2	ENST00000323110.2	cytochrome P450, family 11, subfamily B, polypeptide 2	5	1	0	0	1	1	hsa-miR-873-3p	0.0059	0.0423	0.2683	-0.06	-0.06	N/A
SMYD1	ENST00000419482.2	SET and MYND domain containing 1	5	2	0	1	1	0	hsa-miR-873-3p	0.0115	0.0799	0.4161	-0.06	-0.06	N/A
C11orf21	ENST00000381153.3	chromosome 11 open reading frame 21	5	1	0	1	0	0	hsa-miR-873-3p	0.0089	0.0628	0.3453	-0.06	-0.06	N/A
ADSL	ENST00000216194.7	adenylosuccinate lyase	2319	1	1	0	0	0	hsa-miR-873-3p	0.0029	0.0196	0.098	-0.06	-0.34	N/A
BMPR2	ENST00000374574.2	bone morphogenetic protein receptor, type II (serine/threonine kinase)	287	3	1	1	1	1	hsa-miR-873-3p	0.0159	0.1113	0.6361	-0.06	-0.23	N/A
ADAMTS5	ENST00000284987.5	ADAM metallopeptidase with thrombospondin type 1 motif, 5	68	1	0	0	1	1	hsa-miR-873-3p	0.0048	0.0349	0.2399	-0.06	-0.09	N/A
LONRF2	ENST00000393437.3	LON peptidase N-terminal domain and ring finger 2	394	3	1	1	1	2	hsa-miR-873-3p	0.0226	0.1597	0.925	-0.06	-0.06	N/A
BICD1	ENST00000548411.1	bicaudal D homolog 1 (Drosophila)	205	1	0	0	1	1	hsa-miR-873-3p	0.0132	0.0951	0.6138	-0.06	-0.07	N/A
SMG7	ENST00000367537.3	SMG7 nonsense mediated mRNA decay factor	305	2	1	1	0	0	hsa-miR-873-3p	0.0236	0.1659	0.9074	-0.06	-0.06	N/A
CELF1	ENST00000395290.2	CUGBP, Elav-like family member 1	153	2	0	1	1	0	hsa-miR-873-3p	0.0198	0.1299	0.5799	-0.06	-0.08	N/A
FUT1	ENST00000310160.3	fucosyltransferase 1 (galactoside 2-alpha-L-fucosyltransferase, H blood group)	17	1	0	1	0	0	hsa-miR-873-3p	0.0143	0.0985	0.4867	-0.06	-0.06	N/A
RASL10A	ENST00000401450.3	RAS-like, family 10, member A	5	1	0	1	0	1	hsa-miR-873-3p	0.0059	0.0427	0.2658	-0.06	-0.06	N/A
KCNN3	ENST00000271915.4	potassium intermediate/small conductance calcium-activated channel, subfamily N, member 3	5	3	0	0	3	3	hsa-miR-873-3p	0.0134	0.0976	0.6629	-0.06	-0.06	N/A
ZNF221	ENST00000251269.5	zinc finger protein 221	5	1	0	0	1	0	hsa-miR-873-3p	0.0014	0.0102	0.0727	-0.06	-0.06	N/A
HEATR6	ENST00000184956.6	HEAT repeat containing 6	385	1	0	0	1	0	hsa-miR-873-3p	0.0083	0.0604	0.3997	-0.06	-0.06	N/A
FAM65B	ENST00000259698.4	family with sequence similarity 65, member B	7	1	1	0	0	1	hsa-miR-873-3p	0.0081	0.0593	0.3986	-0.06	-0.06	N/A
TTBK1	ENST00000259750.4	tau tubulin kinase 1	7	1	0	1	0	0	hsa-miR-873-3p	0.0195	0.1316	0.6184	-0.06	-0.06	N/A
BSN	ENST00000296452.4	bassoon presynaptic cytomatrix protein	31	2	0	0	2	1	hsa-miR-873-3p	0.0163	0.1181	0.7649	-0.06	-0.06	N/A
FGD6	ENST00000343958.4	FYVE, RhoGEF and PH domain containing 6	21	1	0	1	0	1	hsa-miR-873-3p	0.0116	0.0811	0.4474	-0.06	-0.08	N/A
DDHD2	ENST00000397166.2	DDHD domain containing 2	961	1	0	0	1	0	hsa-miR-873-3p	0.0017	0.0125	0.0856	-0.06	-0.06	N/A
GMFB	ENST00000554908.1	glia maturation factor, beta	15	1	0	1	0	0	hsa-miR-873-3p	0.0045	0.0317	0.1807	-0.06	-0.17	N/A
ABT1	ENST00000274849.1	activator of basal transcription 1	138	1	1	0	0	0	hsa-miR-873-3p	0.0019	0.0134	0.0756	-0.06	-0.3	N/A
NR4A2	ENST00000409108.2	nuclear receptor subfamily 4, group A, member 2	1631	1	1	0	0	0	hsa-miR-873-3p	0.0079	0.0567	0.3554	-0.06	-0.06	N/A
VMAC	ENST00000339485.3	vimentin-type intermediate filament associated coiled-coil protein	28	2	1	0	1	0	hsa-miR-873-3p	0.0029	0.0209	0.1396	-0.06	-0.35	N/A
LPCAT2	ENST00000262134.5	lysophosphatidylcholine acyltransferase 2	360	1	0	0	1	1	hsa-miR-873-3p	0.0046	0.0338	0.2365	-0.06	-0.07	N/A
DDX18	ENST00000263239.2	DEAD (Asp-Glu-Ala-Asp) box polypeptide 18	141	1	0	0	1	0	hsa-miR-873-3p	0.0048	0.0347	0.2329	-0.06	-0.14	N/A
SLC2A14	ENST00000340749.5	solute carrier family 2 (facilitated glucose transporter), member 14	14	2	0	1	1	0	hsa-miR-873-3p	0.0095	0.062	0.2548	-0.06	-0.16	N/A
PRRC1	ENST00000296666.8	proline-rich coiled-coil 1	2351	1	1	0	0	0	hsa-miR-873-3p	0.0135	0.0911	0.4237	-0.06	-0.08	N/A
FOXP2	ENST00000408937.3	forkhead box P2	169	1	0	0	1	0	hsa-miR-873-3p	0.0019	0.0142	0.0994	-0.06	-0.06	N/A
C1QTNF1	ENST00000392445.2	C1q and tumor necrosis factor related protein 1	74	1	0	1	0	0	hsa-miR-873-3p	0.012	0.0835	0.4421	-0.06	-0.06	N/A
LRRC55	ENST00000497933.1	leucine rich repeat containing 55	5	1	0	0	1	0	hsa-miR-873-3p	0.0044	0.0316	0.2054	-0.06	-0.06	N/A
KIF4B	ENST00000435029.4	kinesin family member 4B	5	1	0	1	0	0	hsa-miR-873-3p	0.011	0.076	0.3781	-0.06	-0.06	N/A
IL36RN	ENST00000346807.3	interleukin 36 receptor antagonist	5	1	0	1	0	1	hsa-miR-873-3p	0.0074	0.0536	0.3465	-0.06	-0.06	N/A
QSOX1	ENST00000367602.3	quiescin Q6 sulfhydryl oxidase 1	9246	3	0	3	0	1	hsa-miR-873-3p	0.0082	0.058	0.317	-0.05	-0.09	N/A
TTC39B	ENST00000512701.2	tetratricopeptide repeat domain 39B	161	1	1	0	0	2	hsa-miR-873-3p	0.0124	0.0884	0.5239	-0.05	-0.12	N/A
ZBTB37	ENST00000367701.5	zinc finger and BTB domain containing 37	213	3	0	2	1	3	hsa-miR-873-3p	0.0332	0.2356	1.3941	-0.05	-0.06	N/A
BACH2	ENST00000257749.4	BTB and CNC homology 1, basic leucine zipper transcription factor 2	74	2	0	0	2	0	hsa-miR-873-3p	0.007	0.0508	0.345	-0.05	-0.07	N/A
QKI	ENST00000392127.2	QKI, KH domain containing, RNA binding	323	2	0	0	2	0	hsa-miR-873-3p	0.0094	0.0683	0.4505	-0.05	-0.06	N/A
AGGF1	ENST00000312916.7	angiogenic factor with G patch and FHA domains 1	890	1	0	0	1	0	hsa-miR-873-3p	0.0053	0.0386	0.2637	-0.05	-0.06	N/A
KLHL7	ENST00000339077.5	kelch-like family member 7	90	2	0	1	1	0	hsa-miR-873-3p	0.0035	0.0249	0.162	-0.05	-0.11	N/A
FRRS1L	ENST00000561981.2	ferric-chelate reductase 1-like	11	1	0	1	0	0	hsa-miR-873-3p	0.0119	0.0849	0.504	-0.05	-0.05	N/A
IL7R	ENST00000343305.4	interleukin 7 receptor	293	1	0	0	1	1	hsa-miR-873-3p	0.007	0.0509	0.3485	-0.05	-0.06	N/A
IHH	ENST00000295731.6	indian hedgehog	238	1	0	1	0	0	hsa-miR-873-3p	0.0072	0.051	0.2842	-0.05	-0.05	N/A
CCDC144A	ENST00000443444.2	coiled-coil domain containing 144A	5	1	0	0	1	0	hsa-miR-873-3p	0.0092	0.0669	0.4516	-0.05	-0.05	N/A
ZNF486	ENST00000335117.8	zinc finger protein 486	10	1	0	1	0	0	hsa-miR-873-3p	0.0069	0.0497	0.3091	-0.05	-0.05	N/A
DUSP19	ENST00000354221.4	dual specificity phosphatase 19	42	3	0	2	1	0	hsa-miR-873-3p	0.0173	0.1165	0.5436	-0.05	-0.07	N/A
CELF6	ENST00000287202.5	CUGBP, Elav-like family member 6	5	1	0	0	1	0	hsa-miR-873-3p	0.0025	0.0185	0.1301	-0.05	-0.05	N/A
MALT1	ENST00000348428.3	mucosa associated lymphoid tissue lymphoma translocation gene 1	295	1	0	0	1	0	hsa-miR-873-3p	0.002	0.0147	0.0953	-0.05	-0.08	N/A
RBM14-RBM4	ENST00000412278.2	RBM14-RBM4 readthrough	151	1	0	0	1	0	hsa-miR-873-3p	0.0008	0.0061	0.0431	-0.05	-0.06	N/A
RASSF2	ENST00000379400.3	Ras association (RalGDS/AF-6) domain family member 2	88	1	0	0	1	1	hsa-miR-873-3p	0.0094	0.0686	0.4562	-0.05	-0.06	N/A
INHBA	ENST00000242208.4	inhibin, beta A	1260	1	0	1	0	0	hsa-miR-873-3p	0.0146	0.1014	0.5326	-0.05	-0.07	N/A
ITGAV	ENST00000261023.3	integrin, alpha V	2407	1	0	1	0	0	hsa-miR-873-3p	0.0147	0.0994	0.4574	-0.05	-0.05	N/A
MUC3A	ENST00000319509.7	mucin 3A, cell surface associated	20	2	0	2	0	0	hsa-miR-873-3p	0.0253	0.1712	0.8025	-0.05	-0.07	N/A
SAMHD1	ENST00000262878.4	SAM domain and HD domain 1	448	1	0	1	0	0	hsa-miR-873-3p	0.0064	0.0458	0.2713	-0.05	-0.1	N/A
RAD9B	ENST00000409425.1	RAD9 homolog B (S. pombe)	10	2	0	0	2	0	hsa-miR-873-3p	0.0037	0.0265	0.1677	-0.05	-0.1	N/A
HOMEZ	ENST00000357460.5	homeobox and leucine zipper encoding	100	1	1	0	0	2	hsa-miR-873-3p	0.0057	0.0398	0.2132	-0.05	-0.16	N/A
ZNF564	ENST00000339282.7	zinc finger protein 564	5	1	0	0	1	0	hsa-miR-873-3p	0.0027	0.02	0.1382	-0.05	-0.05	N/A
BRI3BP	ENST00000341446.8	BRI3 binding protein	820	3	1	1	1	0	hsa-miR-873-3p	0.0097	0.0707	0.4747	-0.05	-0.06	N/A
GABRQ	ENST00000370306.2	gamma-aminobutyric acid (GABA) A receptor, theta	14	1	0	1	0	1	hsa-miR-873-3p	0.009	0.0632	0.3416	-0.05	-0.05	N/A
NCAPH	ENST00000240423.4	non-SMC condensin I complex, subunit H	217	1	0	1	0	1	hsa-miR-873-3p	0.0083	0.0595	0.3696	-0.05	-0.05	N/A
PRKX	ENST00000262848.5	protein kinase, X-linked	12	2	0	0	2	0	hsa-miR-873-3p	0.0049	0.0356	0.2459	-0.05	-0.05	N/A
ALDH3B1	ENST00000539229.1	aldehyde dehydrogenase 3 family, member B1	1512	1	0	0	1	0	hsa-miR-873-3p	0.0019	0.0136	0.0926	-0.05	-0.05	N/A
RP11-114H20.1	ENST00000375644.3		5	2	0	1	1	1	hsa-miR-873-3p	0.0123	0.0885	0.5457	-0.05	-0.05	N/A
CASP3	ENST00000393585.2	caspase 3, apoptosis-related cysteine peptidase	43	1	0	0	1	0	hsa-miR-873-3p	0.0021	0.0151	0.1018	-0.05	-0.05	N/A
PARP12	ENST00000263549.3	poly (ADP-ribose) polymerase family, member 12	16	1	0	0	1	0	hsa-miR-873-3p	0.0013	0.0094	0.0652	-0.05	-0.06	N/A
DIAPH2	ENST00000324765.8	diaphanous-related formin 2	91	2	1	0	1	2	hsa-miR-873-3p	0.0154	0.1114	0.7196	-0.05	-0.06	N/A
DPH3	ENST00000488423.1	diphthamide biosynthesis 3	1281	1	0	1	0	0	hsa-miR-873-3p	0.004	0.0275	0.132	-0.05	-0.17	N/A
BZW1	ENST00000409600.1	basic leucine zipper and W2 domains 1	470	4	1	1	2	2	hsa-miR-873-3p	0.0064	0.0451	0.2615	-0.05	-0.2	N/A
CYP1B1	ENST00000260630.3	cytochrome P450, family 1, subfamily B, polypeptide 1	111	1	0	0	1	0	hsa-miR-873-3p	0.0034	0.0247	0.1677	-0.05	-0.06	N/A
EPB41L4A	ENST00000261486.5	erythrocyte membrane protein band 4.1 like 4A	103	1	0	0	1	0	hsa-miR-873-3p	0.0061	0.044	0.2831	-0.05	-0.09	N/A
FAM182B	ENST00000376403.1	family with sequence similarity 182, member B	9	1	0	1	0	0	hsa-miR-873-3p	0.0033	0.0233	0.1279	-0.05	-0.12	N/A
TCHP	ENST00000405876.4	trichoplein, keratin filament binding	140	2	0	0	2	0	hsa-miR-873-3p	0.0036	0.026	0.1798	-0.05	-0.06	N/A
MCC	ENST00000302475.4	mutated in colorectal cancers	115	1	0	0	1	0	hsa-miR-873-3p	0.0047	0.0342	0.2346	-0.05	-0.1	N/A
MFAP5	ENST00000359478.2	microfibrillar associated protein 5	216	2	0	1	1	0	hsa-miR-873-3p	0.0025	0.0175	0.0904	-0.05	-0.42	N/A
LONP2	ENST00000285737.4	lon peptidase 2, peroxisomal	1004	2	1	1	0	0	hsa-miR-873-3p	0.0115	0.0786	0.375	-0.05	-0.1	N/A
CD1A	ENST00000289429.5	CD1a molecule	5	1	0	1	0	0	hsa-miR-873-3p	0.0063	0.0454	0.2883	-0.05	-0.05	N/A
BSDC1	ENST00000341071.7	BSD domain containing 1	714	1	0	1	0	0	hsa-miR-873-3p	0.0113	0.0792	0.4184	-0.05	-0.05	N/A
RP11-363G10.2	ENST00000375625.3		5	2	0	1	1	1	hsa-miR-873-3p	0.0123	0.0885	0.5457	-0.05	-0.05	N/A
TACR1	ENST00000305249.5	tachykinin receptor 1	5	1	0	1	0	0	hsa-miR-873-3p	0.0115	0.0803	0.4218	-0.05	-0.05	N/A
TBR1	ENST00000389554.3	T-box, brain, 1	5	1	0	1	0	1	hsa-miR-873-3p	0.0108	0.0757	0.418	-0.05	-0.05	N/A
MKS1	ENST00000313863.6	Meckel syndrome, type 1	142	1	0	0	1	0	hsa-miR-873-3p	0.0017	0.0124	0.0878	-0.05	-0.05	N/A
SH3BP2	ENST00000356331.5	SH3-domain binding protein 2	449	4	2	0	2	1	hsa-miR-873-3p	0.0071	0.0516	0.3318	-0.05	-0.1	N/A
PIGV	ENST00000078527.4	phosphatidylinositol glycan anchor biosynthesis, class V	122	3	1	2	0	0	hsa-miR-873-3p	0.0063	0.0434	0.233	-0.05	-0.32	N/A
RBM4	ENST00000310092.7	RNA binding motif protein 4	151	1	0	0	1	0	hsa-miR-873-3p	0.0008	0.0061	0.0431	-0.05	-0.05	N/A
TCEB1	ENST00000518127.1	transcription elongation factor B (SIII), polypeptide 1 (15kDa, elongin C)	637	1	1	0	0	1	hsa-miR-873-3p	0.0034	0.0223	0.098	-0.05	-0.51	N/A
C17orf107	ENST00000381365.3	chromosome 17 open reading frame 107	11	1	0	1	0	3	hsa-miR-873-3p	0.0116	0.0832	0.5038	-0.05	-0.09	N/A
ST13	ENST00000216218.3	suppression of tumorigenicity 13 (colon carcinoma) (Hsp70 interacting protein)	83	1	1	0	0	0	hsa-miR-873-3p	0.0039	0.0266	0.1213	-0.05	-0.21	N/A
MSANTD1	ENST00000507492.1	Myb/SANT-like DNA-binding domain containing 1	7	1	0	1	0	0	hsa-miR-873-3p	0.0065	0.0464	0.2643	-0.05	-0.05	N/A
ARHGEF3	ENST00000296315.3	Rho guanine nucleotide exchange factor (GEF) 3	359	1	0	1	0	0	hsa-miR-873-3p	0.0058	0.041	0.2402	-0.05	-0.05	N/A
CCNI2	ENST00000378731.1	cyclin I family, member 2	5	1	0	1	0	0	hsa-miR-873-3p	0.0082	0.0576	0.311	-0.05	-0.05	N/A
UTP14C	ENST00000521776.2	UTP14, U3 small nucleolar ribonucleoprotein, homolog C (yeast)	174	2	0	1	1	1	hsa-miR-873-3p	0.0184	0.1281	0.6788	-0.05	-0.05	N/A
ARRDC4	ENST00000268042.6	arrestin domain containing 4	10	1	1	0	0	0	hsa-miR-873-3p	0.0077	0.055	0.3233	-0.05	-0.05	N/A
SFTPB	ENST00000519937.2	surfactant protein B	5	1	0	1	0	1	hsa-miR-873-3p	0.0092	0.0661	0.4002	-0.05	-0.05	N/A
TMOD3	ENST00000308580.7	tropomodulin 3 (ubiquitous)	1533	2	0	0	2	0	hsa-miR-873-3p	0.0052	0.0378	0.2601	-0.05	-0.07	N/A
FRMD6	ENST00000395718.2	FERM domain containing 6	508	1	0	1	0	1	hsa-miR-873-3p	0.0086	0.0611	0.3564	-0.05	-0.05	N/A
SHROOM4	ENST00000376020.2	shroom family member 4	5	4	2	1	1	0	hsa-miR-873-3p	0.0108	0.0783	0.5219	-0.05	-0.1	N/A
OLFML2A	ENST00000288815.5	olfactomedin-like 2A	155	2	1	1	0	1	hsa-miR-873-3p	0.0225	0.156	0.8301	-0.05	-0.05	N/A
FZD4	ENST00000531380.1	frizzled family receptor 4	5	2	1	1	0	0	hsa-miR-873-3p	0.0385	0.2544	1.0796	-0.05	-0.05	N/A
SCN2B	ENST00000278947.5	sodium channel, voltage-gated, type II, beta subunit	5	2	1	1	0	2	hsa-miR-873-3p	0.0331	0.2274	1.13	-0.05	-0.05	N/A
PTPN23	ENST00000265562.4	protein tyrosine phosphatase, non-receptor type 23	808	1	0	1	0	0	hsa-miR-873-3p	0.007	0.0507	0.3227	-0.05	-0.05	N/A
SRRM4	ENST00000267260.4	serine/arginine repetitive matrix 4	22	2	1	1	0	1	hsa-miR-873-3p	0.0221	0.1572	0.9263	-0.05	-0.05	N/A
ZNF648	ENST00000339948.3	zinc finger protein 648	5	1	0	0	1	0	hsa-miR-873-3p	0.0022	0.0157	0.1058	-0.05	-0.05	N/A
VPS13B	ENST00000395996.1	vacuolar protein sorting 13 homolog B (yeast)	262	3	0	2	1	2	hsa-miR-873-3p	0.044	0.3086	1.7252	-0.05	-0.05	N/A
C3orf72	ENST00000383165.3	chromosome 3 open reading frame 72	11	3	0	2	1	1	hsa-miR-873-3p	0.0152	0.1089	0.6553	-0.05	-0.05	N/A
TXLNB	ENST00000358430.3	taxilin beta	5	1	0	0	1	0	hsa-miR-873-3p	0.0045	0.0329	0.2239	-0.05	-0.05	N/A
MTF1	ENST00000373036.4	metal-regulatory transcription factor 1	98	2	1	1	0	0	hsa-miR-873-3p	0.0169	0.1208	0.7228	-0.05	-0.05	N/A
POGK	ENST00000367875.1	pogo transposable element with KRAB domain	377	2	0	0	2	0	hsa-miR-873-3p	0.0044	0.0322	0.2193	-0.05	-0.05	N/A
ENTPD1	ENST00000371207.3	ectonucleoside triphosphate diphosphohydrolase 1	15	4	0	2	2	2	hsa-miR-873-3p	0.011	0.0781	0.4572	-0.05	-0.15	N/A
CYCS	ENST00000305786.2	cytochrome c, somatic	320	1	0	0	1	1	hsa-miR-873-3p	0.011	0.0802	0.5325	-0.05	-0.06	N/A
POLR3H	ENST00000396504.2	polymerase (RNA) III (DNA directed) polypeptide H (22.9kD)	216	1	0	1	0	1	hsa-miR-873-3p	0.0144	0.1003	0.5365	-0.05	-0.05	N/A
KDM2A	ENST00000398645.2	lysine (K)-specific demethylase 2A	729	2	1	1	0	1	hsa-miR-873-3p	0.0182	0.1279	0.7138	-0.05	-0.05	N/A
SPTLC2	ENST00000216484.2	serine palmitoyltransferase, long chain base subunit 2	95	1	0	1	0	1	hsa-miR-873-3p	0.01	0.0701	0.3862	-0.05	-0.16	N/A
ACVR2B	ENST00000352511.4	activin A receptor, type IIB	21	1	1	0	0	0	hsa-miR-873-3p	0.0089	0.0615	0.3251	-0.05	-0.11	N/A
PHYHIPL	ENST00000373880.4	phytanoyl-CoA 2-hydroxylase interacting protein-like	26	1	0	0	1	0	hsa-miR-873-3p	0.004	0.0282	0.1622	-0.05	-0.13	N/A
ZBTB16	ENST00000335953.4	zinc finger and BTB domain containing 16	73	1	0	0	1	0	hsa-miR-873-3p	0.0112	0.0812	0.5378	-0.05	-0.05	N/A
THNSL1	ENST00000524413.1	threonine synthase-like 1 (S. cerevisiae)	140	1	0	0	1	0	hsa-miR-873-3p	0.0017	0.0121	0.0826	-0.05	-0.07	N/A
RCSD1	ENST00000367854.3	RCSD domain containing 1	32	1	1	0	0	3	hsa-miR-873-3p	0.0052	0.0382	0.2615	-0.05	-0.4	N/A
AEBP1	ENST00000450684.2	AE binding protein 1	246	1	0	1	0	0	hsa-miR-873-3p	0.0018	0.0131	0.0894	-0.05	-0.05	N/A
PEG10	ENST00000482108.1	paternally expressed 10	8778	1	0	1	0	0	hsa-miR-873-3p	0.0154	0.1038	0.4662	-0.05	-0.05	N/A
AAK1	ENST00000409085.4	AP2 associated kinase 1	27	3	0	1	2	3	hsa-miR-873-3p	0.0102	0.0748	0.5094	-0.05	-0.07	N/A
TNFSF15	ENST00000374045.4	tumor necrosis factor (ligand) superfamily, member 15	29	1	0	0	1	0	hsa-miR-873-3p	0.0058	0.0425	0.2825	-0.05	-0.05	N/A
SLC7A1	ENST00000380752.5	solute carrier family 7 (cationic amino acid transporter, y+ system), member 1	338	2	0	1	1	1	hsa-miR-873-3p	0.0181	0.1245	0.6439	-0.05	-0.06	N/A
GLTSCR1	ENST00000396720.3	glioma tumor suppressor candidate region gene 1	36	1	1	0	0	0	hsa-miR-873-3p	0.0156	0.1051	0.4645	-0.05	-0.05	N/A
TMPRSS4	ENST00000534111.1	transmembrane protease, serine 4	5	2	0	1	1	0	hsa-miR-873-3p	0.0138	0.0984	0.5939	-0.05	-0.05	N/A
SH2D5	ENST00000375031.1	SH2 domain containing 5	7	1	0	1	0	1	hsa-miR-873-3p	0.0109	0.076	0.394	-0.05	-0.05	N/A
CSRNP1	ENST00000273153.5	cysteine-serine-rich nuclear protein 1	544	1	0	1	0	0	hsa-miR-873-3p	0.0126	0.0866	0.4288	-0.05	-0.05	N/A
C1orf216	ENST00000270815.4	chromosome 1 open reading frame 216	203	1	0	1	0	0	hsa-miR-873-3p	0.0159	0.1068	0.4724	-0.05	-0.05	N/A
TLL1	ENST00000061240.2	tolloid-like 1	247	1	0	0	1	0	hsa-miR-873-3p	0.0053	0.0382	0.251	-0.05	-0.05	N/A
MSR1	ENST00000350896.3	macrophage scavenger receptor 1	5	1	0	0	1	0	hsa-miR-873-3p	0.005	0.0368	0.2477	-0.05	-0.05	N/A
ARFGAP2	ENST00000426335.2	ADP-ribosylation factor GTPase activating protein 2	3549	1	1	0	0	0	hsa-miR-873-3p	0.0046	0.0331	0.2158	-0.05	-0.05	N/A
TFAM	ENST00000487519.1	transcription factor A, mitochondrial	1323	3	0	1	2	2	hsa-miR-873-3p	0.0058	0.0423	0.2693	-0.05	-0.33	N/A
ACOX1	ENST00000293217.5	acyl-CoA oxidase 1, palmitoyl	287	2	0	2	0	1	hsa-miR-873-3p	0.0168	0.1159	0.5866	-0.05	-0.07	N/A
SPATA5	ENST00000274008.4	spermatogenesis associated 5	168	4	1	0	3	2	hsa-miR-873-3p	0.0115	0.0831	0.5335	-0.05	-0.06	N/A
SBSPON	ENST00000297354.6	somatomedin B and thrombospondin, type 1 domain containing	8	2	0	0	2	1	hsa-miR-873-3p	0.0052	0.0376	0.2414	-0.05	-0.08	N/A
MCM8	ENST00000378896.3	minichromosome maintenance complex component 8	85	2	0	0	2	1	hsa-miR-873-3p	0.0096	0.0697	0.4532	-0.05	-0.08	N/A
FDXR	ENST00000455107.2	ferredoxin reductase	224	1	0	1	0	0	hsa-miR-873-3p	0.0027	0.0196	0.1299	-0.05	-0.05	N/A
GLDN	ENST00000335449.6	gliomedin	9	1	0	0	1	0	hsa-miR-873-3p	0.0031	0.0227	0.1565	-0.05	-0.05	N/A
UBE2QL1	ENST00000399816.3	ubiquitin-conjugating enzyme E2Q family-like 1	10	1	0	1	0	0	hsa-miR-873-3p	0.0162	0.1082	0.4727	-0.05	-0.05	N/A
LY75-CD302	ENST00000504764.1	LY75-CD302 readthrough	855	2	1	0	1	1	hsa-miR-873-3p	0.0158	0.1059	0.4862	-0.05	-0.07	N/A
LY75	ENST00000554112.1	lymphocyte antigen 75	855	2	1	0	1	1	hsa-miR-873-3p	0.0158	0.1059	0.4862	-0.05	-0.07	N/A
GDAP1	ENST00000220822.7	ganglioside induced differentiation associated protein 1	37	1	0	1	0	0	hsa-miR-873-3p	0.0084	0.0595	0.3375	-0.05	-0.05	N/A
WSCD1	ENST00000574946.1	WSC domain containing 1	403	1	1	0	0	1	hsa-miR-873-3p	0.0122	0.0844	0.4408	-0.05	-0.06	N/A
OTUD3	ENST00000375120.3	OTU domain containing 3	438	2	1	1	0	1	hsa-miR-873-3p	0.0185	0.1301	0.726	-0.05	-0.05	N/A
CXXC4	ENST00000394767.2	CXXC finger protein 4	121	1	0	1	0	0	hsa-miR-873-3p	0.0138	0.0932	0.4187	-0.05	-0.06	N/A
HIPK2	ENST00000406875.3	homeodomain interacting protein kinase 2	48	2	0	1	1	0	hsa-miR-873-3p	0.0188	0.1329	0.7642	-0.05	-0.05	N/A
NLGN2	ENST00000302926.2	neuroligin 2	20	1	0	1	0	0	hsa-miR-873-3p	0.0085	0.0617	0.3903	-0.05	-0.05	N/A
PHF21B	ENST00000403565.1	PHD finger protein 21B	8	2	0	2	0	1	hsa-miR-873-3p	0.0224	0.1566	0.8346	-0.05	-0.05	N/A
MFSD8	ENST00000296468.3	major facilitator superfamily domain containing 8	260	1	0	1	0	0	hsa-miR-873-3p	0.007	0.0509	0.3324	-0.05	-0.05	N/A
GPR55	ENST00000392040.1	G protein-coupled receptor 55	5	1	1	0	0	0	hsa-miR-873-3p	0.0061	0.0431	0.2503	-0.05	-0.05	N/A
SUSD5	ENST00000309558.3	sushi domain containing 5	23	1	0	0	1	1	hsa-miR-873-3p	0.0101	0.0732	0.473	-0.05	-0.05	N/A
TPBGL	ENST00000562197.2	trophoblast glycoprotein-like	8	1	1	0	0	0	hsa-miR-873-3p	0.0084	0.0591	0.317	-0.05	-0.05	N/A
IFNAR1	ENST00000270139.3	interferon (alpha, beta and omega) receptor 1	372	3	2	0	1	0	hsa-miR-873-3p	0.0086	0.0612	0.3495	-0.05	-0.17	N/A
IL17RD	ENST00000296318.7	interleukin 17 receptor D	108	2	0	1	1	1	hsa-miR-873-3p	0.0178	0.127	0.7581	-0.05	-0.05	N/A
SLC2A13	ENST00000280871.4	solute carrier family 2 (facilitated glucose transporter), member 13	47	2	0	1	1	0	hsa-miR-873-3p	0.0113	0.0795	0.4349	-0.05	-0.06	N/A
AGFG1	ENST00000310078.8	ArfGAP with FG repeats 1	2019	1	0	0	1	0	hsa-miR-873-3p	0.0047	0.0341	0.2147	-0.05	-0.05	N/A
LPGAT1	ENST00000366997.4	lysophosphatidylglycerol acyltransferase 1	135	2	0	2	0	0	hsa-miR-873-3p	0.0203	0.1394	0.7011	-0.05	-0.06	N/A
MYLK3	ENST00000394809.4	myosin light chain kinase 3	21	2	0	0	2	0	hsa-miR-873-3p	0.0066	0.0479	0.3251	-0.05	-0.07	N/A
HS6ST3	ENST00000376705.2	heparan sulfate 6-O-sulfotransferase 3	598	1	0	1	0	1	hsa-miR-873-3p	0.0188	0.1307	0.6903	-0.05	-0.05	N/A
STXBP3	ENST00000370008.3	syntaxin binding protein 3	10	1	0	0	1	0	hsa-miR-873-3p	0.0019	0.014	0.0963	-0.05	-0.09	N/A
SLC12A8	ENST00000430155.2	solute carrier family 12, member 8	11	1	0	0	1	2	hsa-miR-873-3p	0.0059	0.0434	0.296	-0.05	-0.1	N/A
CALD1	ENST00000361388.2	caldesmon 1	1013	2	0	0	2	0	hsa-miR-873-3p	0.0048	0.0354	0.2458	-0.05	-0.06	N/A
LRIG2	ENST00000361127.5	leucine-rich repeats and immunoglobulin-like domains 2	348	2	1	1	0	1	hsa-miR-873-3p	0.0275	0.1915	1.0369	-0.05	-0.05	N/A
KLF12	ENST00000377669.2	Kruppel-like factor 12	251	1	1	0	0	2	hsa-miR-873-3p	0.0199	0.1406	0.8072	-0.05	-0.05	N/A
NMNAT2	ENST00000294868.4	nicotinamide nucleotide adenylyltransferase 2	18	1	0	1	0	2	hsa-miR-873-3p	0.0229	0.1578	0.8187	-0.05	-0.05	N/A
NWD1	ENST00000524140.2	NACHT and WD repeat domain containing 1	5	1	0	0	1	0	hsa-miR-873-3p	0.0047	0.0347	0.2401	-0.05	-0.05	N/A
FCRL3	ENST00000368184.3	Fc receptor-like 3	5	1	0	0	1	0	hsa-miR-873-3p	0.0094	0.0678	0.4131	-0.05	-0.05	N/A
C10orf54	ENST00000394957.3	chromosome 10 open reading frame 54	78	1	0	0	1	0	hsa-miR-873-3p	0.0022	0.0161	0.1092	-0.05	-0.05	N/A
APOL6	ENST00000409652.4	apolipoprotein L, 6	5	2	0	2	0	1	hsa-miR-873-3p	0.0321	0.2227	1.1728	-0.05	-0.05	N/A
SLC44A2	ENST00000586078.1	solute carrier family 44 (choline transporter), member 2	720	1	0	0	1	0	hsa-miR-873-3p	0.002	0.0149	0.1066	-0.05	-0.05	N/A
C17orf102	ENST00000357754.1	chromosome 17 open reading frame 102	5	1	0	0	1	0	hsa-miR-873-3p	0.0048	0.0354	0.2455	-0.05	-0.05	N/A
MARVELD2	ENST00000325631.5	MARVEL domain containing 2	227	1	0	0	1	1	hsa-miR-873-3p	0.0041	0.0296	0.199	-0.05	-0.05	N/A
BLOC1S2	ENST00000441611.1	biogenesis of lysosomal organelles complex-1, subunit 2	83	1	0	0	1	0	hsa-miR-873-3p	0.002	0.0147	0.097	-0.05	-0.1	N/A
RAB23	ENST00000317483.3	RAB23, member RAS oncogene family	32	1	0	1	0	1	hsa-miR-873-3p	0.0039	0.0276	0.1599	-0.05	-0.11	N/A
CAMSAP1	ENST00000389532.4	calmodulin regulated spectrin-associated protein 1	966	2	0	2	0	0	hsa-miR-873-3p	0.0058	0.0405	0.2168	-0.05	-0.09	N/A
LUZP1	ENST00000418342.1	leucine zipper protein 1	434	2	0	2	0	0	hsa-miR-873-3p	0.0223	0.1519	0.7294	-0.05	-0.05	N/A
ALG1	ENST00000262374.5	ALG1, chitobiosyldiphosphodolichol beta-mannosyltransferase	275	3	0	1	2	0	hsa-miR-873-3p	0.0098	0.0669	0.3261	-0.05	-0.06	N/A
TNRC6B	ENST00000335727.9	trinucleotide repeat containing 6B	69	3	0	3	0	2	hsa-miR-873-3p	0.0532	0.3657	1.8905	-0.05	-0.06	N/A
TMEM139	ENST00000359333.3	transmembrane protein 139	17	2	0	2	0	1	hsa-miR-873-3p	0.0073	0.0515	0.2808	-0.05	-0.12	N/A
GMPS	ENST00000496455.2	guanine monphosphate synthase	867	2	1	1	0	1	hsa-miR-873-3p	0.0244	0.168	0.8554	-0.05	-0.05	N/A
TMEM38A	ENST00000187762.2	transmembrane protein 38A	158	1	1	0	0	1	hsa-miR-873-3p	0.0116	0.0828	0.5018	-0.04	-0.04	N/A
STAT2	ENST00000314128.4	signal transducer and activator of transcription 2, 113kDa	33	1	0	1	0	1	hsa-miR-873-3p	0.0196	0.1346	0.6726	-0.04	-0.04	N/A
IL1R1	ENST00000410023.1	interleukin 1 receptor, type I	1713	1	0	1	0	1	hsa-miR-873-3p	0.0203	0.1368	0.6401	-0.04	-0.04	N/A
GTF2E1	ENST00000283875.5	general transcription factor IIE, polypeptide 1, alpha 56kDa	218	1	0	0	1	1	hsa-miR-873-3p	0.0051	0.0375	0.2557	-0.04	-0.04	N/A
WDR20	ENST00000335263.5	WD repeat domain 20	288	1	0	1	0	0	hsa-miR-873-3p	0.0081	0.0582	0.3539	-0.04	-0.04	N/A
ATP13A1	ENST00000291503.5	ATPase type 13A1	69	1	0	1	0	0	hsa-miR-873-3p	0.0036	0.0257	0.1634	-0.04	-0.04	N/A
CCDC152	ENST00000361970.5	coiled-coil domain containing 152	5	1	0	0	1	0	hsa-miR-873-3p	0.0033	0.024	0.1617	-0.04	-0.04	N/A
CCDC122	ENST00000444614.3	coiled-coil domain containing 122	103	1	0	1	0	2	hsa-miR-873-3p	0.0029	0.0211	0.1472	-0.04	-0.04	N/A
STRIP2	ENST00000249344.2	striatin interacting protein 2	87	1	0	1	0	0	hsa-miR-873-3p	0.0093	0.0655	0.3631	-0.04	-0.06	N/A
LRP10	ENST00000359591.4	low density lipoprotein receptor-related protein 10	939	2	1	1	0	1	hsa-miR-873-3p	0.0121	0.0873	0.5556	-0.04	-0.09	N/A
NMNAT1	ENST00000377205.1	nicotinamide nucleotide adenylyltransferase 1	72	2	0	1	1	1	hsa-miR-873-3p	0.01	0.0702	0.3821	-0.04	-0.06	N/A
AHI1	ENST00000417892.2	Abelson helper integration site 1	72	1	1	0	0	0	hsa-miR-873-3p	0.006	0.039	0.1583	-0.04	-0.23	N/A
KLHL38	ENST00000325995.7	kelch-like family member 38	13	1	0	1	0	1	hsa-miR-873-3p	0.0153	0.1028	0.4785	-0.04	-0.08	N/A
RAD51L3-RFFL	ENST00000593039.1	Uncharacterized protein	670	1	0	0	1	1	hsa-miR-873-3p	0.0038	0.0282	0.1957	-0.04	-0.05	N/A
PRLR	ENST00000342362.5	prolactin receptor	95	5	0	1	4	0	hsa-miR-873-3p	0.0138	0.0997	0.6413	-0.04	-0.06	N/A
ZBTB7C	ENST00000535628.2	zinc finger and BTB domain containing 7C	23	2	0	2	0	2	hsa-miR-873-3p	0.0288	0.196	0.93	-0.04	-0.06	N/A
SH2D4A	ENST00000265807.3	SH2 domain containing 4A	131	1	0	0	1	0	hsa-miR-873-3p	0.0015	0.0108	0.0755	-0.04	-0.04	N/A
WWP2	ENST00000359154.2	WW domain containing E3 ubiquitin protein ligase 2	405	1	0	1	0	0	hsa-miR-873-3p	0.0161	0.1094	0.5114	-0.04	-0.04	N/A
CD274	ENST00000381573.4	CD274 molecule	351	1	0	0	1	0	hsa-miR-873-3p	0.0032	0.0236	0.1651	-0.04	-0.04	N/A
KRTAP1-3	ENST00000344363.5	keratin associated protein 1-3	5	1	0	0	1	0	hsa-miR-873-3p	0.0008	0.0061	0.0437	-0.04	-0.04	N/A
YPEL1	ENST00000339468.3	yippee-like 1 (Drosophila)	81	1	0	0	1	2	hsa-miR-873-3p	0.0055	0.04	0.2726	-0.04	-0.08	N/A
LRRD1	ENST00000343318.5	leucine-rich repeats and death domain containing 1	9	3	0	1	2	1	hsa-miR-873-3p	0.0067	0.0474	0.2826	-0.04	-0.1	N/A
ZNF81	ENST00000338637.7	zinc finger protein 81	10	2	0	2	0	2	hsa-miR-873-3p	0.0193	0.1384	0.8471	-0.04	-0.04	N/A
AICDA	ENST00000229335.6	activation-induced cytidine deaminase	5	1	0	0	1	0	hsa-miR-873-3p	0.0015	0.0109	0.078	-0.04	-0.04	N/A
FAM20B	ENST00000263733.4	family with sequence similarity 20, member B	113	2	0	1	1	0	hsa-miR-873-3p	0.0107	0.0756	0.442	-0.04	-0.09	N/A
ATG10	ENST00000282185.3	autophagy related 10	25	1	0	1	0	0	hsa-miR-873-3p	0.0048	0.0337	0.1852	-0.04	-0.08	N/A
ZFP28	ENST00000301318.3	ZFP28 zinc finger protein	79	2	1	0	1	0	hsa-miR-873-3p	0.0049	0.0349	0.196	-0.04	-0.08	N/A
RTCA	ENST00000370128.4	RNA 3'-terminal phosphate cyclase	1093	2	0	1	1	0	hsa-miR-873-3p	0.0047	0.0338	0.2068	-0.04	-0.08	N/A
CCND2	ENST00000261254.3	cyclin D2	66	1	0	1	0	1	hsa-miR-873-3p	0.0097	0.0704	0.4557	-0.04	-0.05	N/A
CHMP3	ENST00000263856.4	charged multivesicular body protein 3	2466	1	1	0	0	0	hsa-miR-873-3p	0.0031	0.0216	0.1168	-0.04	-0.15	N/A
RCVRN	ENST00000226193.5	recoverin	5	1	0	0	1	1	hsa-miR-873-3p	0.0013	0.0097	0.0688	-0.04	-0.04	N/A
RAB20	ENST00000267328.3	RAB20, member RAS oncogene family	119	1	0	1	0	0	hsa-miR-873-3p	0.0038	0.0275	0.1729	-0.04	-0.04	N/A
ZNF329	ENST00000598312.1	zinc finger protein 329	163	1	0	0	1	0	hsa-miR-873-3p	0.0029	0.021	0.1445	-0.04	-0.04	N/A
SLC33A1	ENST00000392845.3	solute carrier family 33 (acetyl-CoA transporter), member 1	145	2	1	0	1	0	hsa-miR-873-3p	0.0056	0.04	0.2513	-0.04	-0.13	N/A
NUP43	ENST00000367403.3	nucleoporin 43kDa	113	1	0	1	0	0	hsa-miR-873-3p	0.0128	0.0886	0.447	-0.04	-0.05	N/A
ARHGAP12	ENST00000311380.4	Rho GTPase activating protein 12	190	1	0	0	1	0	hsa-miR-873-3p	0.0045	0.0328	0.2069	-0.04	-0.04	N/A
FAM83A	ENST00000518448.1	family with sequence similarity 83, member A	22	1	0	1	0	0	hsa-miR-873-3p	0.0173	0.1152	0.4993	-0.04	-0.04	N/A
SHCBP1	ENST00000303383.3	SHC SH2-domain binding protein 1	59	2	1	1	0	0	hsa-miR-873-3p	0.01	0.0699	0.3752	-0.04	-0.07	N/A
ESRP1	ENST00000358397.5	epithelial splicing regulatory protein 1	74	1	0	1	0	0	hsa-miR-873-3p	0.0049	0.0355	0.2276	-0.04	-0.04	N/A
BLCAP	ENST00000397137.1	bladder cancer associated protein	38	1	1	0	0	0	hsa-miR-873-3p	0.0013	0.0095	0.0515	-0.04	-0.36	N/A
CYP20A1	ENST00000356079.4	cytochrome P450, family 20, subfamily A, polypeptide 1	170	6	2	0	4	3	hsa-miR-873-3p	0.0082	0.06	0.4172	-0.04	-0.27	N/A
DDAH2	ENST00000375789.2	dimethylarginine dimethylaminohydrolase 2	26	1	0	1	0	0	hsa-miR-873-3p	0.0035	0.0249	0.1505	-0.04	-0.11	N/A
CAMKV	ENST00000296471.7	CaM kinase-like vesicle-associated	47	1	0	1	0	1	hsa-miR-873-3p	0.0054	0.0392	0.2445	-0.04	-0.07	N/A
BTBD7	ENST00000334746.5	BTB (POZ) domain containing 7	590	2	1	1	0	1	hsa-miR-873-3p	0.0194	0.1372	0.767	-0.04	-0.05	N/A
ZNF620	ENST00000314529.6	zinc finger protein 620	78	1	0	0	1	2	hsa-miR-873-3p	0.0078	0.0562	0.3657	-0.04	-0.05	N/A
MTX3	ENST00000509852.1	metaxin 3	304	1	0	1	0	2	hsa-miR-873-3p	0.009	0.0653	0.4354	-0.04	-0.04	N/A
TAF13	ENST00000338366.5	TAF13 RNA polymerase II, TATA box binding protein (TBP)-associated factor, 18kDa	745	1	0	0	1	0	hsa-miR-873-3p	0.0013	0.0095	0.0681	-0.04	-0.04	N/A
POLH	ENST00000372226.1	polymerase (DNA directed), eta	450	1	0	0	1	2	hsa-miR-873-3p	0.0113	0.0813	0.5033	-0.04	-0.05	N/A
SH3PXD2A	ENST00000369774.4	SH3 and PX domains 2A	152	2	1	1	0	0	hsa-miR-873-3p	0.011	0.0786	0.4743	-0.04	-0.05	N/A
TLK2	ENST00000582809.1	tousled-like kinase 2	5	1	0	1	0	1	hsa-miR-873-3p	0.0059	0.0428	0.2822	-0.04	-0.08	N/A
MAB21L1	ENST00000379919.4	mab-21-like 1 (C. elegans)	25	1	0	1	0	0	hsa-miR-873-3p	0.0022	0.0154	0.0794	-0.04	-0.22	N/A
NFATC3	ENST00000329524.4	nuclear factor of activated T-cells, cytoplasmic, calcineurin-dependent 3	221	1	1	0	0	0	hsa-miR-873-3p	0.0075	0.0542	0.3399	-0.04	-0.04	N/A
NECAB1	ENST00000417640.2	N-terminal EF-hand calcium binding protein 1	5	1	0	1	0	0	hsa-miR-873-3p	0.0137	0.0957	0.5154	-0.04	-0.04	N/A
CDC25A	ENST00000302506.3	cell division cycle 25A	5	1	0	1	0	0	hsa-miR-873-3p	0.0072	0.0513	0.3	-0.04	-0.04	N/A
C17orf105	ENST00000449302.3	chromosome 17 open reading frame 105	5	2	0	1	1	0	hsa-miR-873-3p	0.0105	0.0751	0.4574	-0.04	-0.04	N/A
CYP1A1	ENST00000379727.3	cytochrome P450, family 1, subfamily A, polypeptide 1	837	1	0	0	1	0	hsa-miR-873-3p	0.0011	0.0078	0.0546	-0.04	-0.04	N/A
RBM28	ENST00000223073.2	RNA binding motif protein 28	297	6	1	2	3	0	hsa-miR-873-3p	0.0075	0.054	0.3335	-0.04	-0.14	N/A
SFXN3	ENST00000393459.1	sideroflexin 3	154	1	0	1	0	1	hsa-miR-873-3p	0.0141	0.0968	0.4721	-0.04	-0.04	N/A
SLC39A14	ENST00000381237.1	solute carrier family 39 (zinc transporter), member 14	2413	1	0	1	0	0	hsa-miR-873-3p	0.0056	0.0398	0.2344	-0.04	-0.04	N/A
MAP3K9	ENST00000554752.2	mitogen-activated protein kinase kinase kinase 9	44	2	0	1	1	1	hsa-miR-873-3p	0.0179	0.1259	0.7224	-0.04	-0.05	N/A
AL161915.1	ENST00000391366.1	Uncharacterized protein	18	1	0	0	1	1	hsa-miR-873-3p	0.0061	0.0442	0.2951	-0.04	-0.05	N/A
THUMPD3	ENST00000345094.3	THUMP domain containing 3	445	1	0	0	1	0	hsa-miR-873-3p	0.003	0.0221	0.1538	-0.04	-0.07	N/A
GPC6	ENST00000377047.4	glypican 6	410	1	0	0	1	0	hsa-miR-873-3p	0.0024	0.0173	0.1189	-0.04	-0.04	N/A
CNTLN	ENST00000380641.4	centlein, centrosomal protein	42	2	0	1	1	0	hsa-miR-873-3p	0.0088	0.0627	0.3685	-0.04	-0.07	N/A
NCK1	ENST00000469404.1	NCK adaptor protein 1	415	2	0	2	0	0	hsa-miR-873-3p	0.0042	0.0277	0.1146	-0.04	-0.25	N/A
HS3ST3B1	ENST00000360954.2	heparan sulfate (glucosamine) 3-O-sulfotransferase 3B1	1489	1	0	0	1	0	hsa-miR-873-3p	0.0032	0.0231	0.1586	-0.04	-0.04	N/A
GAREM	ENST00000399218.4	GRB2 associated, regulator of MAPK1	536	1	0	1	0	0	hsa-miR-873-3p	0.0183	0.1241	0.6058	-0.04	-0.06	N/A
TRIM25	ENST00000316881.4	tripartite motif containing 25	247	1	0	1	0	0	hsa-miR-873-3p	0.0115	0.0802	0.4327	-0.04	-0.04	N/A
TULP4	ENST00000367094.2	tubby like protein 4	93	1	0	1	0	1	hsa-miR-873-3p	0.0105	0.0748	0.4536	-0.04	-0.05	N/A
CASP2	ENST00000310447.5	caspase 2, apoptosis-related cysteine peptidase	274	1	0	0	1	1	hsa-miR-873-3p	0.0032	0.0233	0.1672	-0.04	-0.04	N/A
ZSCAN22	ENST00000329665.4	zinc finger and SCAN domain containing 22	45	1	0	1	0	1	hsa-miR-873-3p	0.0074	0.0513	0.2695	-0.04	-0.08	N/A
SLIT3	ENST00000519560.1	slit homolog 3 (Drosophila)	13	2	1	1	0	0	hsa-miR-873-3p	0.0221	0.1508	0.7188	-0.04	-0.05	N/A
HBEGF	ENST00000230990.6	heparin-binding EGF-like growth factor	28	1	0	0	1	0	hsa-miR-873-3p	0.0017	0.0126	0.0845	-0.04	-0.1	N/A
COMMD2	ENST00000473414.1	COMM domain containing 2	833	1	0	0	1	1	hsa-miR-873-3p	0.0051	0.0375	0.2597	-0.04	-0.04	N/A
SLC35E2B	ENST00000378662.1	solute carrier family 35, member E2B	5	2	0	1	1	0	hsa-miR-873-3p	0.0295	0.1931	0.8277	-0.04	-0.04	N/A
C11orf87	ENST00000327419.6	chromosome 11 open reading frame 87	5	1	1	0	0	1	hsa-miR-873-3p	0.0071	0.051	0.3145	-0.04	-0.04	N/A
TNFRSF1B	ENST00000376259.3	tumor necrosis factor receptor superfamily, member 1B	243	1	1	0	0	0	hsa-miR-873-3p	0.0122	0.0844	0.4324	-0.04	-0.04	N/A
RPL7L1	ENST00000493763.1	ribosomal protein L7-like 1	824	2	1	0	1	0	hsa-miR-873-3p	0.0134	0.0955	0.564	-0.04	-0.04	N/A
MTMR11	ENST00000406732.3	myotubularin related protein 11	16	1	0	1	0	0	hsa-miR-873-3p	0.0031	0.0221	0.1432	-0.04	-0.04	N/A
VANGL2	ENST00000368061.2	VANGL planar cell polarity protein 2	560	1	0	1	0	0	hsa-miR-873-3p	0.009	0.0639	0.3602	-0.04	-0.04	N/A
UNC80	ENST00000439458.1	unc-80 homolog (C. elegans)	5	1	0	1	0	0	hsa-miR-873-3p	0.0288	0.1859	0.75	-0.04	-0.04	N/A
CHRNA10	ENST00000250699.2	cholinergic receptor, nicotinic, alpha 10 (neuronal)	5	1	0	1	0	0	hsa-miR-873-3p	0.0031	0.0223	0.1506	-0.04	-0.04	N/A
SLCO1A2	ENST00000307378.6	solute carrier organic anion transporter family, member 1A2	5	2	0	1	1	0	hsa-miR-873-3p	0.0242	0.1593	0.6827	-0.04	-0.04	N/A
SERF1A	ENST00000354833.3	small EDRK-rich factor 1A (telomeric)	5	1	0	0	1	1	hsa-miR-873-3p	0.001	0.0076	0.0547	-0.04	-0.04	N/A
PLXNA2	ENST00000367033.3	plexin A2	8	2	0	1	1	1	hsa-miR-873-3p	0.0213	0.1435	0.669	-0.04	-0.04	N/A
APOLD1	ENST00000356591.4	apolipoprotein L domain containing 1	27	3	1	0	2	1	hsa-miR-873-3p	0.0073	0.0533	0.357	-0.04	-0.14	N/A
C1orf173	ENST00000326665.5	chromosome 1 open reading frame 173	5	1	0	0	1	0	hsa-miR-873-3p	0.0066	0.0477	0.3085	-0.04	-0.04	N/A
ATP2B4	ENST00000367218.3	ATPase, Ca++ transporting, plasma membrane 4	7311	1	0	1	0	0	hsa-miR-873-3p	0.0118	0.0818	0.4262	-0.04	-0.04	N/A
ZC3H8	ENST00000409573.2	zinc finger CCCH-type containing 8	216	1	0	0	1	1	hsa-miR-873-3p	0.0032	0.0237	0.1636	-0.04	-0.11	N/A
RNASEH2B	ENST00000336617.3	ribonuclease H2, subunit B	131	1	0	0	1	1	hsa-miR-873-3p	0.0004	0.0026	0.0187	-0.04	-0.07	N/A
MASTL	ENST00000342386.6	microtubule associated serine/threonine kinase-like	317	1	1	0	0	0	hsa-miR-873-3p	0.0026	0.0184	0.1151	-0.04	-0.17	N/A
DNAL1	ENST00000553645.2	dynein, axonemal, light chain 1	81	3	1	0	2	3	hsa-miR-873-3p	0.0023	0.0157	0.081	-0.04	-0.36	N/A
MMP16	ENST00000286614.6	matrix metallopeptidase 16 (membrane-inserted)	12	3	0	1	2	1	hsa-miR-873-3p	0.0114	0.0821	0.523	-0.04	-0.06	N/A
PTAR1	ENST00000377200.5	protein prenyltransferase alpha subunit repeat containing 1	161	2	0	1	1	0	hsa-miR-873-3p	0.0136	0.0906	0.4085	-0.04	-0.07	N/A
PRSS16	ENST00000230582.3	protease, serine, 16 (thymus)	77	1	0	1	0	0	hsa-miR-873-3p	0.0044	0.0297	0.1358	-0.04	-0.14	N/A
NFKBIE	ENST00000275015.5	nuclear factor of kappa light polypeptide gene enhancer in B-cells inhibitor, epsilon	49	1	0	1	0	0	hsa-miR-873-3p	0.0037	0.0253	0.131	-0.04	-0.19	N/A
GRPEL1	ENST00000264954.4	GrpE-like 1, mitochondrial (E. coli)	1416	1	0	1	0	0	hsa-miR-873-3p	0.0036	0.0255	0.1359	-0.04	-0.11	N/A
RPL32	ENST00000429711.2	ribosomal protein L32	2274	1	0	1	0	0	hsa-miR-873-3p	0.0037	0.0243	0.103	-0.04	-0.2	N/A
ST3GAL2	ENST00000342907.2	ST3 beta-galactoside alpha-2,3-sialyltransferase 2	102	1	0	1	0	0	hsa-miR-873-3p	0.008	0.0561	0.3117	-0.04	-0.05	N/A
PNPLA3	ENST00000216180.3	patatin-like phospholipase domain containing 3	147	2	0	2	0	0	hsa-miR-873-3p	0.0264	0.1788	0.8304	-0.04	-0.05	N/A
RC3H1	ENST00000367696.2	ring finger and CCCH-type domains 1	165	2	1	1	0	0	hsa-miR-873-3p	0.0213	0.1486	0.8112	-0.04	-0.05	N/A
BCKDHB	ENST00000545529.1	branched chain keto acid dehydrogenase E1, beta polypeptide	143	3	0	1	2	0	hsa-miR-873-3p	0.0106	0.0742	0.4064	-0.04	-0.04	N/A
ZNF844	ENST00000439326.3	zinc finger protein 844	11	2	0	2	0	1	hsa-miR-873-3p	0.0332	0.2297	1.1928	-0.04	-0.04	N/A
IYD	ENST00000344419.3	iodotyrosine deiodinase	5	2	1	0	1	0	hsa-miR-873-3p	0.0143	0.1008	0.5719	-0.04	-0.04	N/A
CALN1	ENST00000329008.5	calneuron 1	5	2	0	2	0	2	hsa-miR-873-3p	0.0235	0.1684	1.0236	-0.04	-0.04	N/A
KCND3	ENST00000369697.1	potassium voltage-gated channel, Shal-related subfamily, member 3	23	2	0	2	0	0	hsa-miR-873-3p	0.0131	0.0932	0.5566	-0.04	-0.04	N/A
KREMEN1	ENST00000400335.4	kringle containing transmembrane protein 1	606	2	0	2	0	0	hsa-miR-873-3p	0.0219	0.1542	0.8512	-0.04	-0.04	N/A
DOK6	ENST00000382713.5	docking protein 6	8	2	0	2	0	0	hsa-miR-873-3p	0.0205	0.1436	0.7751	-0.04	-0.04	N/A
KLF3	ENST00000261438.5	Kruppel-like factor 3 (basic)	515	1	0	1	0	1	hsa-miR-873-3p	0.0066	0.0468	0.2608	-0.04	-0.05	N/A
DRAXIN	ENST00000294485.5	dorsal inhibitory axon guidance protein	5	2	1	0	1	1	hsa-miR-873-3p	0.0133	0.0953	0.5817	-0.04	-0.04	N/A
SYT2	ENST00000367267.1	synaptotagmin II	5	2	1	0	1	0	hsa-miR-873-3p	0.0144	0.1008	0.5507	-0.04	-0.04	N/A
TMEM132B	ENST00000299308.3	transmembrane protein 132B	5	2	1	0	1	1	hsa-miR-873-3p	0.027	0.1852	0.9615	-0.04	-0.04	N/A
AL133373.1	ENST00000596306.1	Uncharacterized protein	5	2	0	1	1	1	hsa-miR-873-3p	0.0123	0.0869	0.4992	-0.04	-0.04	N/A
RIMS1	ENST00000348717.5	regulating synaptic membrane exocytosis 1	45	2	0	2	0	1	hsa-miR-873-3p	0.0276	0.1922	1.0201	-0.04	-0.04	N/A
ZNF365	ENST00000395254.3	zinc finger protein 365	173	1	0	1	0	0	hsa-miR-873-3p	0.0092	0.0649	0.3709	-0.04	-0.04	N/A
ZNF609	ENST00000326648.3	zinc finger protein 609	103	2	0	1	1	2	hsa-miR-873-3p	0.0184	0.1315	0.7912	-0.04	-0.04	N/A
PPARD	ENST00000448077.2	peroxisome proliferator-activated receptor delta	239	2	0	0	2	1	hsa-miR-873-3p	0.0058	0.0419	0.2722	-0.04	-0.04	N/A
PLCXD1	ENST00000381657.2	phosphatidylinositol-specific phospholipase C, X domain containing 1	5	2	1	0	1	1	hsa-miR-873-3p	0.0057	0.0419	0.288	-0.04	-0.04	N/A
KCNK3	ENST00000302909.3	potassium channel, subfamily K, member 3	19	2	0	1	1	1	hsa-miR-873-3p	0.0145	0.1037	0.6285	-0.04	-0.04	N/A
WDR52	ENST00000393845.2	WD repeat domain 52	5	1	0	1	0	1	hsa-miR-873-3p	0.0369	0.2417	1.0833	-0.04	-0.04	N/A
GRIN2B	ENST00000609686.1	glutamate receptor, ionotropic, N-methyl D-aspartate 2B	5	2	0	2	0	7	hsa-miR-873-3p	0.0486	0.3441	2.0034	-0.04	-0.04	N/A
PITPNB	ENST00000335272.5	phosphatidylinositol transfer protein, beta	80	1	0	1	0	0	hsa-miR-873-3p	0.0015	0.0106	0.0702	-0.04	-0.16	N/A
ARL4C	ENST00000390645.2	ADP-ribosylation factor-like 4C	84	1	0	0	1	0	hsa-miR-873-3p	0.0024	0.0178	0.1219	-0.04	-0.06	N/A
TAPBP	ENST00000434618.2	TAP binding protein (tapasin)	1144	2	0	0	2	2	hsa-miR-873-3p	0.0061	0.0444	0.2813	-0.04	-0.04	N/A
NCR3LG1	ENST00000338965.4	natural killer cell cytotoxicity receptor 3 ligand 1	214	2	1	0	1	2	hsa-miR-873-3p	0.0113	0.082	0.5339	-0.04	-0.04	N/A
RNF103-CHMP3	ENST00000604011.1	RNF103-CHMP3 readthrough	2466	1	1	0	0	0	hsa-miR-873-3p	0.0031	0.0214	0.116	-0.04	-0.14	N/A
MINA	ENST00000333396.7	MYC induced nuclear antigen	209	2	0	1	1	0	hsa-miR-873-3p	0.0079	0.0554	0.2984	-0.04	-0.1	N/A
PTBP3	ENST00000374257.1	polypyrimidine tract binding protein 3	214	1	0	0	1	1	hsa-miR-873-3p	0.006	0.0436	0.2967	-0.04	-0.11	N/A
ZNF738	ENST00000380870.4	zinc finger protein 738	28	2	0	1	1	2	hsa-miR-873-3p	0.0051	0.0369	0.2467	-0.04	-0.07	N/A
RFFL	ENST00000315249.7	ring finger and FYVE-like domain containing E3 ubiquitin protein ligase	670	1	0	0	1	1	hsa-miR-873-3p	0.0039	0.0287	0.1996	-0.04	-0.05	N/A
MLEC	ENST00000228506.3	malectin	12084	1	0	0	1	1	hsa-miR-873-3p	0.005	0.0365	0.255	-0.04	-0.04	N/A
FAM118A	ENST00000216214.3	family with sequence similarity 118, member A	202	1	0	0	1	0	hsa-miR-873-3p	0.0018	0.0132	0.0924	-0.04	-0.04	N/A
ARHGEF39	ENST00000343259.3	Rho guanine nucleotide exchange factor (GEF) 39	141	1	0	1	0	0	hsa-miR-873-3p	0.0105	0.07	0.3182	-0.04	-0.09	N/A
RPRD2	ENST00000539519.1	regulation of nuclear pre-mRNA domain containing 2	280	1	0	1	0	0	hsa-miR-873-3p	0.0112	0.0806	0.5074	-0.04	-0.04	N/A
FAM78A	ENST00000372269.3	family with sequence similarity 78, member A	7	1	0	0	1	2	hsa-miR-873-3p	0.0047	0.034	0.2278	-0.04	-0.06	N/A
PIK3CG	ENST00000359195.3	phosphatidylinositol-4,5-bisphosphate 3-kinase, catalytic subunit gamma	5	2	0	0	2	0	hsa-miR-873-3p	0.0048	0.035	0.2387	-0.04	-0.09	N/A
CCNJ	ENST00000265992.5	cyclin J	5	1	0	0	1	0	hsa-miR-873-3p	0.0042	0.0309	0.2193	-0.04	-0.04	N/A
C2CD4C	ENST00000332235.6	C2 calcium-dependent domain containing 4C	70	1	0	1	0	0	hsa-miR-873-3p	0.0133	0.0904	0.4257	-0.04	-0.04	N/A
FAXDC2	ENST00000326080.5	fatty acid hydroxylase domain containing 2	43	1	0	1	0	1	hsa-miR-873-3p	0.013	0.0931	0.5616	-0.04	-0.04	N/A
SERF1B	ENST00000380750.3	small EDRK-rich factor 1B (centromeric)	5	1	0	0	1	1	hsa-miR-873-3p	0.001	0.0075	0.0539	-0.04	-0.04	N/A
IQGAP3	ENST00000361170.2	IQ motif containing GTPase activating protein 3	7	1	0	1	0	0	hsa-miR-873-3p	0.0087	0.0621	0.366	-0.04	-0.04	N/A
CLSPN	ENST00000318121.3	claspin	92	3	1	0	2	0	hsa-miR-873-3p	0.0067	0.0487	0.3292	-0.04	-0.07	N/A
ZIK1	ENST00000307468.4	zinc finger protein interacting with K protein 1	64	1	0	0	1	0	hsa-miR-873-3p	0.005	0.0367	0.2553	-0.04	-0.05	N/A
TEF	ENST00000266304.4	thyrotrophic embryonic factor	60	2	0	2	0	1	hsa-miR-873-3p	0.0186	0.1312	0.7427	-0.04	-0.04	N/A
AMT	ENST00000458307.2	aminomethyltransferase	63	1	0	1	0	0	hsa-miR-873-3p	0.0016	0.0112	0.0662	-0.04	-0.2	N/A
TCEANC2	ENST00000234827.1	transcription elongation factor A (SII) N-terminal and central domain containing 2	78	1	1	0	0	1	hsa-miR-873-3p	0.0019	0.0135	0.0803	-0.04	-0.32	N/A
GPR180	ENST00000376958.4	G protein-coupled receptor 180	161	1	0	0	1	0	hsa-miR-873-3p	0.0055	0.0398	0.2565	-0.04	-0.04	N/A
TAF1B	ENST00000263663.5	TATA box binding protein (TBP)-associated factor, RNA polymerase I, B, 63kDa	214	3	0	2	1	1	hsa-miR-873-3p	0.0147	0.0988	0.4682	-0.04	-0.09	N/A
EEF2K	ENST00000263026.5	eukaryotic elongation factor-2 kinase	115	2	0	2	0	3	hsa-miR-873-3p	0.0241	0.1693	0.9333	-0.04	-0.04	N/A
TMEM79	ENST00000295694.5	transmembrane protein 79	11	1	0	1	0	0	hsa-miR-873-3p	0.0042	0.0297	0.1757	-0.04	-0.07	N/A
ATP6V1B2	ENST00000276390.2	ATPase, H+ transporting, lysosomal 56/58kDa, V1 subunit B2	97	1	0	1	0	1	hsa-miR-873-3p	0.0039	0.028	0.1662	-0.04	-0.12	N/A
UBTF	ENST00000343638.5	upstream binding transcription factor, RNA polymerase I	1090	2	0	2	0	0	hsa-miR-873-3p	0.015	0.1054	0.5753	-0.04	-0.04	N/A
GRPEL2	ENST00000416916.2	GrpE-like 2, mitochondrial (E. coli)	79	1	0	0	1	2	hsa-miR-873-3p	0.0057	0.0417	0.2885	-0.04	-0.04	N/A
HTR6	ENST00000289753.1	5-hydroxytryptamine (serotonin) receptor 6, G protein-coupled	16	1	0	1	0	1	hsa-miR-873-3p	0.0113	0.0773	0.386	-0.04	-0.06	N/A
LEPREL4	ENST00000355468.3	leprecan-like 4	221	2	0	1	1	0	hsa-miR-873-3p	0.0092	0.0645	0.3461	-0.04	-0.04	N/A
CTD-2368P22.1	ENST00000550135.1	HCG1811579; Uncharacterized protein	25	1	1	0	0	1	hsa-miR-873-3p	0.0121	0.0873	0.5428	-0.04	-0.04	N/A
RLIM	ENST00000332687.6	ring finger protein, LIM domain interacting	662	1	0	0	1	2	hsa-miR-873-3p	0.0065	0.0473	0.3288	-0.04	-0.15	N/A
KAT2A	ENST00000225916.5	K(lysine) acetyltransferase 2A	468	1	0	1	0	0	hsa-miR-873-3p	0.0097	0.068	0.3761	-0.04	-0.04	N/A
TMEM221	ENST00000341130.5	transmembrane protein 221	5	1	0	0	1	0	hsa-miR-873-3p	0.0018	0.0129	0.0915	-0.04	-0.04	N/A
TBXA2R	ENST00000375190.4	thromboxane A2 receptor	169	2	0	0	2	0	hsa-miR-873-3p	0.0011	0.0083	0.0583	-0.04	-0.05	N/A
C4orf32	ENST00000309733.5	chromosome 4 open reading frame 32	325	1	0	0	1	1	hsa-miR-873-3p	0.0009	0.0064	0.0436	-0.04	-0.09	N/A
MUC20	ENST00000320736.6	mucin 20, cell surface associated	11	2	0	1	1	0	hsa-miR-873-3p	0.0121	0.083	0.4309	-0.04	-0.09	N/A
WDR43	ENST00000407426.3	WD repeat domain 43	426	1	0	0	1	0	hsa-miR-873-3p	0.0014	0.0098	0.0638	-0.04	-0.08	N/A
CD44	ENST00000278386.6	CD44 molecule (Indian blood group)	1543	1	0	0	1	0	hsa-miR-873-3p	0.0021	0.015	0.0981	-0.04	-0.07	N/A
NICN1	ENST00000273598.3	nicolin 1	244	1	0	1	0	1	hsa-miR-873-3p	0.0141	0.0968	0.4732	-0.04	-0.04	N/A
STC2	ENST00000265087.4	stanniocalcin 2	1112	1	0	0	1	0	hsa-miR-873-3p	0.0033	0.0238	0.1607	-0.04	-0.04	N/A
MTAP	ENST00000380172.4	methylthioadenosine phosphorylase	1575	1	1	0	0	0	hsa-miR-873-3p	0.003	0.0201	0.0927	-0.04	-0.18	N/A
DUSP27	ENST00000443333.1	dual specificity phosphatase 27 (putative)	16	2	1	0	1	1	hsa-miR-873-3p	0.0022	0.0162	0.1161	-0.04	-0.16	N/A
RACGAP1	ENST00000427314.2	Rac GTPase activating protein 1	19	1	0	1	0	0	hsa-miR-873-3p	0.0026	0.0185	0.1079	-0.04	-0.12	N/A
APOL2	ENST00000358502.5	apolipoprotein L, 2	12	1	0	1	0	1	hsa-miR-873-3p	0.0122	0.0839	0.4132	-0.04	-0.04	N/A
MFN2	ENST00000444836.1	mitofusin 2	1096	1	0	1	0	0	hsa-miR-873-3p	0.0067	0.0475	0.2826	-0.04	-0.04	N/A
RBM39	ENST00000253363.6	RNA binding motif protein 39	182	1	0	0	1	1	hsa-miR-873-3p	0.0015	0.0113	0.0768	-0.04	-0.18	N/A
PSMD14	ENST00000409682.3	proteasome (prosome, macropain) 26S subunit, non-ATPase, 14	194	1	1	0	0	0	hsa-miR-873-3p	0.0012	0.0085	0.042	-0.04	-0.51	N/A
FAM210B	ENST00000371384.3	family with sequence similarity 210, member B	55	1	0	1	0	0	hsa-miR-873-3p	0.0033	0.0235	0.1391	-0.04	-0.09	N/A
CCNB1IP1	ENST00000398160.2	cyclin B1 interacting protein 1, E3 ubiquitin protein ligase	20	1	0	0	1	2	hsa-miR-873-3p	0.0056	0.0404	0.2547	-0.04	-0.07	N/A
YIPF4	ENST00000238831.4	Yip1 domain family, member 4	3482	2	0	0	2	2	hsa-miR-873-3p	0.0046	0.0335	0.2197	-0.04	-0.1	N/A
DDX3X	ENST00000399959.2	DEAD (Asp-Glu-Ala-Asp) box helicase 3, X-linked	965	1	0	1	0	2	hsa-miR-873-3p	0.0054	0.035	0.1384	-0.04	-0.15	N/A
GOLT1B	ENST00000540141.1	golgi transport 1B	848	1	0	0	1	0	hsa-miR-873-3p	0.0012	0.0088	0.058	-0.04	-0.13	N/A
ARL10	ENST00000310389.5	ADP-ribosylation factor-like 10	236	3	0	1	2	2	hsa-miR-873-3p	0.0234	0.1649	0.9402	-0.04	-0.04	N/A
RTN4IP1	ENST00000539449.1	reticulon 4 interacting protein 1	19	1	0	1	0	0	hsa-miR-873-3p	0.0033	0.0227	0.1121	-0.04	-0.14	N/A
PLXDC2	ENST00000377252.4	plexin domain containing 2	506	2	0	1	1	2	hsa-miR-873-3p	0.0127	0.0906	0.5474	-0.04	-0.1	N/A
B3GALT5	ENST00000380620.4	UDP-Gal:betaGlcNAc beta 1,3-galactosyltransferase, polypeptide 5	5	2	0	1	1	0	hsa-miR-873-3p	0.0266	0.1857	1.0401	-0.04	-0.04	N/A
SLC25A22	ENST00000320230.5	solute carrier family 25 (mitochondrial carrier: glutamate), member 22	319	1	0	1	0	0	hsa-miR-873-3p	0.011	0.0767	0.4051	-0.04	-0.04	N/A
XIAP	ENST00000371199.3	X-linked inhibitor of apoptosis	153	1	1	0	0	0	hsa-miR-873-3p	0.0121	0.0848	0.4638	-0.04	-0.06	N/A
PPFIBP2	ENST00000533792.1	PTPRF interacting protein, binding protein 2 (liprin beta 2)	90	2	0	1	1	0	hsa-miR-873-3p	0.0054	0.0392	0.2631	-0.04	-0.07	N/A
ASCL5	ENST00000449188.2	achaete-scute complex homolog 5 (Drosophila)	12	1	0	1	0	0	hsa-miR-873-3p	0.0045	0.0323	0.1978	-0.04	-0.04	N/A
TXNRD3NB	ENST00000383572.2	thioredoxin reductase 3 neighbor	10	1	0	1	0	2	hsa-miR-873-3p	0.0035	0.0252	0.1699	-0.04	-0.07	N/A
TEX22	ENST00000451127.2	testis expressed 22	9	2	0	2	0	2	hsa-miR-873-3p	0.011	0.0791	0.4909	-0.04	-0.06	N/A
ZNF250	ENST00000292579.7	zinc finger protein 250	67	2	0	2	0	1	hsa-miR-873-3p	0.0082	0.0576	0.3203	-0.04	-0.07	N/A
SAR1B	ENST00000402673.2	SAR1 homolog B (S. cerevisiae)	1404	2	0	1	1	0	hsa-miR-873-3p	0.0039	0.0283	0.1799	-0.04	-0.17	N/A
CDK19	ENST00000368911.3	cyclin-dependent kinase 19	51	1	0	1	0	1	hsa-miR-873-3p	0.0106	0.0752	0.427	-0.04	-0.04	N/A
WDR17	ENST00000393643.2	WD repeat domain 17	113	2	1	0	1	0	hsa-miR-873-3p	0.0076	0.0551	0.3586	-0.04	-0.04	N/A
EXOC7	ENST00000607838.1	exocyst complex component 7	1483	2	1	1	0	0	hsa-miR-873-3p	0.0101	0.0713	0.3946	-0.04	-0.06	N/A
SBNO1	ENST00000420886.2	strawberry notch homolog 1 (Drosophila)	87	2	1	1	0	0	hsa-miR-873-3p	0.0097	0.0692	0.4129	-0.04	-0.22	N/A
UBE2Q1	ENST00000292211.4	ubiquitin-conjugating enzyme E2Q family member 1	3046	2	0	1	1	0	hsa-miR-873-3p	0.0056	0.0399	0.244	-0.04	-0.05	N/A
ZNF490	ENST00000311437.6	zinc finger protein 490	97	2	0	2	0	0	hsa-miR-873-3p	0.017	0.1103	0.4916	-0.04	-0.1	N/A
CCDC69	ENST00000355417.2	coiled-coil domain containing 69	22	1	0	1	0	0	hsa-miR-873-3p	0.011	0.0766	0.4051	-0.04	-0.04	N/A
UST	ENST00000367463.4	uronyl-2-sulfotransferase	933	1	1	0	0	1	hsa-miR-873-3p	0.0043	0.0314	0.2122	-0.04	-0.04	N/A
GPD2	ENST00000540309.1	glycerol-3-phosphate dehydrogenase 2 (mitochondrial)	196	1	0	0	1	0	hsa-miR-873-3p	0.0024	0.0172	0.1204	-0.04	-0.04	N/A
KRBA2	ENST00000396267.1	KRAB-A domain containing 2	14	2	0	1	1	0	hsa-miR-873-3p	0.0091	0.0653	0.3962	-0.04	-0.05	N/A
FBXO48	ENST00000377957.3	F-box protein 48	13	1	0	0	1	1	hsa-miR-873-3p	0.0047	0.034	0.2223	-0.04	-0.09	N/A
CIAPIN1	ENST00000565961.1	cytokine induced apoptosis inhibitor 1	423	1	0	0	1	0	hsa-miR-873-3p	0.0013	0.0093	0.0661	-0.04	-0.04	N/A
RP11-276H1.3	ENST00000312019.2		5	1	0	0	1	0	hsa-miR-873-3p	0.0016	0.0117	0.0833	-0.04	-0.04	N/A
RAB22A	ENST00000244040.3	RAB22A, member RAS oncogene family	484	1	0	0	1	1	hsa-miR-873-3p	0.0043	0.0314	0.223	-0.04	-0.06	N/A
SYCE2	ENST00000293695.7	synaptonemal complex central element protein 2	5	1	0	1	0	0	hsa-miR-873-3p	0.0041	0.0299	0.1917	-0.04	-0.04	N/A
GGA2	ENST00000309859.4	golgi-associated, gamma adaptin ear containing, ARF binding protein 2	645	1	1	0	0	0	hsa-miR-873-3p	0.007	0.0499	0.301	-0.04	-0.13	N/A
MX2	ENST00000330714.3	myxovirus (influenza virus) resistance 2 (mouse)	7	1	0	1	0	0	hsa-miR-873-3p	0.0079	0.0557	0.3035	-0.04	-0.04	N/A
KIF5A	ENST00000455537.2	kinesin family member 5A	5	1	0	0	1	0	hsa-miR-873-3p	0.006	0.0433	0.2857	-0.04	-0.04	N/A
LRRC14	ENST00000292524.1	leucine rich repeat containing 14	469	2	0	2	0	0	hsa-miR-873-3p	0.0055	0.0404	0.271	-0.03	-0.04	N/A
TMEM251	ENST00000415050.2	transmembrane protein 251	14	3	1	1	1	1	hsa-miR-873-3p	0.0051	0.0358	0.2001	-0.03	-0.18	N/A
FZD3	ENST00000240093.3	frizzled family receptor 3	192	3	0	1	2	1	hsa-miR-873-3p	0.0296	0.2019	1.0446	-0.03	-0.04	N/A
SLC30A7	ENST00000370112.4	solute carrier family 30 (zinc transporter), member 7	204	2	1	1	0	3	hsa-miR-873-3p	0.0107	0.0748	0.4182	-0.03	-0.14	N/A
GLRB	ENST00000541722.1	glycine receptor, beta	118	1	0	0	1	0	hsa-miR-873-3p	0.0008	0.0061	0.0415	-0.03	-0.07	N/A
MAGI3	ENST00000307546.9	membrane associated guanylate kinase, WW and PDZ domain containing 3	70	1	1	0	0	0	hsa-miR-873-3p	0.0089	0.0624	0.3495	-0.03	-0.13	N/A
TIRAP	ENST00000392679.1	toll-interleukin 1 receptor (TIR) domain containing adaptor protein	82	3	0	2	1	0	hsa-miR-873-3p	0.0148	0.1018	0.5098	-0.03	-0.07	N/A
[truncated: 2,299 more rows]
