# Supplementary material for: Identification of a novel intermittent hypoxia-related prognostic lncRNA signature and the ceRNA of lncRNA GSEC/miR-873-3p/EGLN3 regulatory axis in lung adenocarcinoma
Source: PeerJ journal article supplement (doi:10.7717/peerj.16242), 2023-10-10
Supplement: Rawdata.zip [file Rawdata.zip]

## Sheet: Figure9
Figure 9A Relative expression of GSEC						Figure 9E Relative GSEC level							Figure 9H Migration rate
HBE	0.892	1.023	0.923			A549			PC9				si-ctrl	si-GSEC
A549	2.405	3.124	2.782		si-ctrl	1.12	1.23	1.345	1.353	1.401	1.384		0.887	0.345
PC9	1.987	2.254	2.672		si-GSEC	0.452	0.523	0.483	0.78	0.82	0.798		0.85	0.324
NCI-H1299	2.235	1.672	1.567										0.793	0.382
Figure 9B Relative expression of miR-873-3p						Figure 9F CCK8 A549							Figure 9I Migration rate
HBE	1.231	1.342	1.125			Time	si-ctrl	si-GSEC					si-ctrl	si-GSEC
A549	0.56	0.654	0.712			0h	0	0					0.768	0.507
PC9	0.532	0.598	0.512			12h	1	0.9					0.824	0.436
NCI-H1299	0.782	0.867	0.734			24h	2	1.34					0.715	0.462
						48h	2.89	2.02
						72h	3.34	2.67
Figure 9C Relative expression of EGLN3													Figure 9J colony number
HBE	0.592	0.623	0.573										si-ctrl	si-GSEC
A549	1.105	1.224	1.012										899	123
PC9	0.987	1.094	0.872			Figure 9G CCK8 PC9							892	136
NCI-H1299	0.835	0.692	0.767			Time	si-ctrl	si-GSEC					1012	92
						0h	0	0
						12h	1	0.9
Figure 7D Relative EGLN3 protein level						24h	2	1.34					Figure 9K colony number
HBE	0.125	0.265	0.234			48h	2.89	2.02					si-ctrl	si-GSEC
A549	0.782	0.712	0.698			72h	3.34	2.67					819	163
PC9	0.653	0.573	0.612										872	204
NCI-H1299	0.453	0.563	0.612										802	146

## Sheet: Figure10
	Figure 10A Relative miR-873-3p level									Figure 10E Relative luciferase activity(PC9)
	A549			PC9						ctrl mimics			miR-873-3p mimics
si-ctrl	1.45	1.23	1.32	1.235	1.345	1.567			GSEC mut	0.979	1.064	1.043	0.884	1.081	0.998
si-GSEC	5.578	6.125	5.234	4.789	3.89	4.567			GSEC wt	0.805	0.902	0.915	0.553	0.497	0.501
	Figure 10B Relative GSEC level									Figure 10F Relative RNA enrichment(A549)
	A549			PC9						GSEC			miR-873-3p
ctrl mimics	1.324	1.23	1.32	1.235	1.345	1.324			IgG	1.312	1.254	1.341	1.579	1.427	1.433
miR-873-3P mimics	0.489	0.425	0.502	0.678	0.782	0.653			Ago2	6.789	6.436	6.545	5.758	6.016	6.078
	Figure 10D Relative luciferase activity(A549)									Figure 10G Relative RNA enrichment(PC9)
	ctrl mimics			miR-873-3P mimics						GSEC			miR-873-3p
GSEC mut	0.987	1.078	1.056	0.887	1.093	1.002			IgG	1.342	1.287	1.452	1.212	1.456	1.123
GSEC wt	0.889	0.923	1.015	0.542	0.489	0.5023			Ago2	3.789	4.12	4.04	4.892	5.012	4.567

## Sheet: Figure11
	Figure 11A Relative miR-873-3p level								Figure 11D Migration rate A549
	A549			PC9					si-ctrl+ctrl inhibitor	si-GSEC+ctrl inhibitor	si-GSEC+miR-873-3p inhibitor
ctrl-inhibitor	0.987	1.089	1.12	1.098	1.123	1.154			0.991	0.354	0.681
miR-873-3P inhibitor	0.245	0.412	0.389	0.523	0.587	0.682			0.965	0.401	0.734
									1.189	0.355	0.603
Figure 11B Cell viability A549									Figure 11E Migration rate PC9
Time	si-ctrl+ctrl inhibitor	si-GSEC+ctrl inhibitor	si-GSEC+miR-873-3p inhibitor						si-ctrl+ctrl inhibitor	si-GSEC+ctrl inhibitor	si-GSEC+miR-873-3p inhibitor
0h	0	0	0						0.987	0.367	0.812
12h	1.23	0.87	1						0.878	0.412	0.723
24h	2.34	1.45	2.12						0.978	0.3345	0.678
48h	3.05	2.12	2.69
72h	3.56	2.67	3.12
Figure 11C Cell viability PC9									Figure 11F Colony number A549
Time	si-ctrl+ctrl inhibitor	si-GSEC+ctrl inhibitor	si-GSEC+miR-873-3p inhibitor						si-ctrl+ctrl inhibitor	si-GSEC+ctrl inhibitor	si-GSEC+miR-873-3p inhibitor
0h	0	0	0						1157	107	376
12h	1.345	0.92	1.12						1203	106	330
24h	2.245	1.352	1.982						1102	145	272
48h	3.123	2.452	2.92
72h	3.782	3.082	3.452
									Figure 112F Colony number PC9
									si-ctrl+ctrl inhibitor	si-GSEC+ctrl inhibitor	si-GSEC+miR-873-3p inhibitor
									1157	107	376
									1203	106	330
									1102	145	272

## Sheet: Figure12
	Figure 12B Relative luciferase activity A549									Figure 12F Relative EGLN3 protein level
	ctrl mimics			miR-873-3p mimics						A549			PC9
EGLN3 mut	0.926	1.088	1.082	1.092	1.0542	0.982			ctrl mimics	0.987	1.054	1.012	1.234	1.234	1.002
EGLN3 wt	0.983	1.045	0.985	0.452	0.489	0.402			miR-873-3p mimics	0.345	0.312	0.423	0.564	0.456	0.478
	Figure 12C Relative luciferase activity PC9
	ctrl mimics			miR-873-3p mimics						Figure 12G EGLN3 mRNA level
EGLN3 mut	0.856	1.0234	0.9872	0.912	1.0342	0.892				A549			PC9
EGLN3 wt	0.783	0.8234	0.865	0.435	0.534	0.467			si-ctrl+ctrl inhibitor	1.0256	1.3678	1.2456	1.123	1.398	1.056
									si-GSEC+ctrl inhibitor	0.345	0.412	0.3987	0.423	0.5124	0.4987
									si-GSEC+miR-873-3p inhibitor	0.678	0.8123	0.7892	0.812	0.7456	0.7123
	Figure 12D Relative EGLN3 mRNA level
	A549			PC9
ctrl mimics	1.023	1.124	0.987	1.123	1.234	1.256
miR-873-3p mimics	0.564	0.623	0.487	0.435	0.382	0.354
										Figure 12I EGLN3 protein level
										A549			PC9
									si-ctrl+ctrl inhibitor	1.0256	1.1256	1.0978	0.698	0.765	0.812
									si-GSEC+ctrl inhibitor	0.4897	0.5123	0.4678	0.236	0.256	0.2098
									si-GSEC+miR-873-3p inhibitor	0.912	0.8345	0.935	0.453	0.512	0.412
